# Supplementary material for: Aberrant splicing in human cancer has a large-scale functional impact on transcription factors
Source: bioRxiv preprint, doi:10.1101/2025.10.16.682783, version 1 (2025-10-16)
Supplement: Supplementary Table S6 [file 682783_file03.xlsx]

## Sheet: Supplementary Table S6
Supplementary Table S6: List of PTSEs correlating with TF footprinting

## Sheet: TF footprinting
CANCER	TF	AS_ID	AS_TYPE	DNA_MOTIF	SPEARMAN_COR	P_VALUE	FOOTPRINT	FDR
BLCA	ARNT	7513	ES	M2957_1.02	0.0424242	0.46	Depth	0.496757
BLCA	ARNT	7513	ES	M6151_1.02	-0.0787879	0.51	Depth	0.521273
BLCA	NR1I3	8624	AT	M6387_1.02	0.139394	0.31	Depth	0.468376
BLCA	NR1I3	8624	AT	M6388_1.02	0.345455	0.15	Depth	0.438663
BLCA	ATF3	9737	AA	M4552_1.02	-0.175758	0.3	Depth	0.467189
BLCA	ATF3	9737	AA	M4684_1.02	-0.260606	0.23	Depth	0.456646
BLCA	ATF3	9737	AA	M6153_1.02	-0.0666667	0.45	Depth	0.494677
BLCA	CREM	11229	AP	M6181_1.02	0.357576	0.15	Depth	0.438663
BLCA	CREM	11237	AT	M6181_1.02	-0.0545455	0.44	Depth	0.491324
BLCA	CREM	11238	AT	M6181_1.02	0.163636	0.37	Depth	0.4769
BLCA	TCF7L2	13156	ES	M6512_1.02	0.0182372	0.4	Depth	0.48512
BLCA	NR1H3	15703	ES	M6383_1.02	-0.260606	0.27	Depth	0.463037
BLCA	NR1H3	15705	RI	M6383_1.02	-0.187879	0.33	Depth	0.468733
BLCA	RELA	16898	RI	M4444_1.02	-0.309091	0.18	Depth	0.449969
BLCA	NR4A1	21884	AP	M6393_1.02	0.563636	0.02	Depth	0.275872
BLCA	NR4A1	21887	AP	M6393_1.02	-0.612121	0.07	Depth	0.390174
BLCA	HMGA2	22881	AT	M6280_1.02	0.684848	0.03	Depth	0.320116
BLCA	NR2C1	23741	AT	M6389_1.02	-0.406061	0.13	Depth	0.430329
BLCA	NR2C1	23742	AT	M6389_1.02	0.406061	0.18	Depth	0.449969
BLCA	NFATC4	26983	AP	M6365_1.02	-0.345455	0.18	Depth	0.449969
BLCA	NFATC4	26991	RI	M6365_1.02	-0.0545455	0.47	Depth	0.501079
BLCA	FOS	28499	RI	M2278_1.02	0.321212	0.21	Depth	0.456646
BLCA	FOS	28499	RI	M6231_1.02	0.29697	0.15	Depth	0.438663
BLCA	MEIS2	29905	AP	M5619_1.02	0.0424242	0.52	Depth	0.527461
BLCA	MEIS2	29905	AP	M5620_1.02	-0.418182	0.1	Depth	0.410039
BLCA	MAZ	35942	ES	M6336_1.02	0.224242	0.27	Depth	0.463037
BLCA	SREBF1	39505	ES	M2387_1.02	0.00606061	0.43	Depth	0.489072
BLCA	SREBF1	39505	ES	M3944_1.02	0.175758	0.41	Depth	0.486495
BLCA	RARA	40858	AP	M5763_1.02	0.127273	0.38	Depth	0.480523
BLCA	RARA	40858	AP	M5762_1.02	0.2	0.22	Depth	0.456646
BLCA	RARA	40858	AP	M5761_1.02	0.0545455	0.41	Depth	0.486495
BLCA	RARA	40858	AP	M6443_1.02	0.139394	0.3	Depth	0.467189
BLCA	NFE2L1	42158	AP	M4030_1.02	-0.272727	0.22	Depth	0.456646
BLCA	TGIF1	44497	AP	M4064_1.02	0.139394	0.27	Depth	0.463037
BLCA	TGIF1	44497	AP	M5933_1.02	0.0787879	0.47	Depth	0.501079
BLCA	TGIF1	44497	AP	M6519_1.02	0.381818	0.11	Depth	0.417512
BLCA	TGIF1	44497	AP	M6520_1.02	-0.151515	0.35	Depth	0.474663
BLCA	TGIF1	44503	AP	M4064_1.02	-0.175758	0.31	Depth	0.468376
BLCA	TGIF1	44503	AP	M5933_1.02	-0.224242	0.27	Depth	0.463037
BLCA	TGIF1	44503	AP	M6519_1.02	-0.333333	0.15	Depth	0.438663
BLCA	TGIF1	44503	AP	M6520_1.02	0.127273	0.24	Depth	0.4595
BLCA	TCF3	46539	RI	M3155_1.02	0.418182	0.14	Depth	0.43632
BLCA	TCF3	46539	RI	M3154_1.02	-0.0181818	0.42	Depth	0.487425
BLCA	TCF3	46539	RI	M6516_1.02	-0.406061	0.12	Depth	0.425792
BLCA	ZNF333	48022	ES	M6555_1.02	-0.103344	0.33	Depth	0.468733
BLCA	USF2	49098	ES	M4579_1.02	-0.030303	0.54	Depth	0.54288
BLCA	FOSB	50450	AT	M6228_1.02	-0.248485	0.32	Depth	0.46856
BLCA	FOSB	50451	AT	M6228_1.02	0.248485	0.21	Depth	0.456646
BLCA	BCL11A	53658	AT	M4453_1.02	0.139394	0.44	Depth	0.491324
BLCA	BCL11A	53659	AT	M4453_1.02	-0.139394	0.4	Depth	0.48512
BLCA	NR4A2	55613	AP	M5687_1.02	-0.418182	0.11	Depth	0.417512
BLCA	NR4A2	55613	AP	M5685_1.02	-0.793939	0	Depth	0
BLCA	NR4A2	55613	AP	M5686_1.02	-0.539394	0.03	Depth	0.320116
BLCA	NR4A2	55614	AP	M5687_1.02	0.50303	0.04	Depth	0.339193
BLCA	NR4A2	55614	AP	M5685_1.02	0.321212	0.15	Depth	0.438663
BLCA	NR4A2	55614	AP	M5686_1.02	0.0666667	0.44	Depth	0.491324
BLCA	STAT1	56594	AT	M6493_1.02	0.187879	0.27	Depth	0.463037
BLCA	STAT1	56594	AT	M3966_1.02	0.6	0.05	Depth	0.363241
BLCA	STAT1	56594	AT	M3968_1.02	0.357576	0.17	Depth	0.44765
BLCA	STAT1	56594	AT	M4707_1.02	0.224242	0.31	Depth	0.468376
BLCA	STAT1	56595	AT	M6493_1.02	-0.187879	0.34	Depth	0.472261
BLCA	STAT1	56595	AT	M3966_1.02	-0.6	0.05	Depth	0.363241
BLCA	STAT1	56595	AT	M3968_1.02	-0.357576	0.16	Depth	0.44356
BLCA	STAT1	56595	AT	M4707_1.02	-0.224242	0.29	Depth	0.466743
BLCA	SIM2	60533	AT	M5234_1.02	0.44985	0.09	Depth	0.405939
BLCA	SIM2	60533	AT	M5234_1.02	0.44985	0.09	Depth	0.405939
BLCA	SIM2	60534	AT	M5234_1.02	-0.44985	0.13	Depth	0.430329
BLCA	SIM2	60534	AT	M5234_1.02	-0.44985	0.12	Depth	0.425792
BLCA	KLF3	69020	AT	M6323_1.02	-0.127273	0.42	Depth	0.487425
BLCA	KLF3	69021	AT	M6323_1.02	0.127273	0.42	Depth	0.487425
BLCA	MEF2C	72747	AP	M2297_1.02	0.0424242	0.5	Depth	0.515062
BLCA	MEF2C	72749	AP	M2297_1.02	-0.0424242	0.5	Depth	0.515062
BRCA	HES4	6	RI	M0191_1.02	-0.0902988	0.25	Depth	0.462506
BRCA	TP73	325	ES	M6116_1.02	0.00323715	0.55	Depth	0.552178
BRCA	TP73	325	ES	M6117_1.02	-0.00031582	0.48	Depth	0.505364
BRCA	TP73	325	ES	M6405_1.02	-0.0202519	0.47	Depth	0.501079
BRCA	GMEB1	1390	AA	M1545_1.02	0.0596962	0.3	Depth	0.467189
BRCA	HEYL	1898	AP	M0183_1.02	0.0417891	0.41	Depth	0.486495
BRCA	HEYL	1899	AP	M0183_1.02	-0.0417891	0.42	Depth	0.487425
BRCA	FOXJ3	2064	AP	M5456_1.02	0.124236	0.15	Depth	0.438663
BRCA	FOXJ3	2064	AP	M5457_1.02	-0.060852	0.28	Depth	0.464162
BRCA	FOXJ3	2064	AP	M5458_1.02	-0.0147354	0.47	Depth	0.501079
BRCA	FOXJ3	2064	AP	M6242_1.02	-0.0931958	0.18	Depth	0.449969
BRCA	FOXJ3	2064	AP	M6243_1.02	-0.102615	0.24	Depth	0.4595
BRCA	ARNT	7513	ES	M2957_1.02	-0.0439991	0.4	Depth	0.48512
BRCA	ARNT	7513	ES	M6151_1.02	-0.0644405	0.33	Depth	0.468733
BRCA	RFX5	7601	AP	M4510_1.02	-0.0614023	0.29	Depth	0.466743
BRCA	RFX5	7601	AP	M5780_1.02	-0.0940819	0.2	Depth	0.455938
BRCA	RFX5	7603	AP	M4510_1.02	0.0838699	0.22	Depth	0.456646
BRCA	RFX5	7603	AP	M5780_1.02	0.0785379	0.28	Depth	0.464162
BRCA	RORC	7674	ES	M6455_1.02	-0.0339853	0.41	Depth	0.486495
BRCA	CREB3L4	7768	AP	M5323_1.02	-0.193444	0.03	Depth	0.320116
BRCA	CREB3L4	7769	AP	M5323_1.02	0.193444	0.03	Depth	0.320116
BRCA	ZBTB7B	7876	AP	M5961_1.02	0.0161977	0.44	Depth	0.491324
BRCA	ZBTB7B	7876	AP	M6539_1.02	0.0240035	0.4	Depth	0.48512
BRCA	ZBTB7B	7877	AP	M5961_1.02	-0.145873	0.12	Depth	0.425792
BRCA	ZBTB7B	7877	AP	M6539_1.02	-0.0745254	0.31	Depth	0.468376
BRCA	PBX1	8790	ES	M1898_1.02	-0.139993	0.09	Depth	0.405939
BRCA	ELF3	9394	RI	M5376_1.02	-0.0349032	0.39	Depth	0.483684
BRCA	ELF3	9394	RI	M6205_1.02	-0.159749	0.07	Depth	0.390174
BRCA	ESRRG	9832	ES	M5413_1.02	0.0928173	0.29	Depth	0.466743
BRCA	ESRRG	9832	ES	M5411_1.02	-0.0843444	0.37	Depth	0.4769
BRCA	ESRRG	9832	ES	M5412_1.02	-0.0130946	0.46	Depth	0.496757
BRCA	CREM	11229	AP	M6181_1.02	-0.025635	0.45	Depth	0.494677
BRCA	CREM	11231	AP	M6181_1.02	0.209998	0.06	Depth	0.374783
BRCA	CREM	11237	AT	M6181_1.02	-0.0742403	0.24	Depth	0.4595
BRCA	CREM	11238	AT	M6181_1.02	0.0883531	0.22	Depth	0.456646
BRCA	CREM	11242	ES	M6181_1.02	-0.0256807	0.5	Depth	0.515062
BRCA	CREM	11258	ES	M6181_1.02	-0.109028	0.21	Depth	0.456646
BRCA	CREM	11261	ES	M6181_1.02	-0.195384	0.03	Depth	0.320116
BRCA	CREM	11264	ES	M6181_1.02	-0.190226	0.05	Depth	0.363241
BRCA	ARID5B	11865	AP	M3574_1.02	-0.0211541	0.49	Depth	0.51005
BRCA	ARID5B	11865	AP	M6149_1.02	-0.15744	0.1	Depth	0.410039
BRCA	ARID5B	11866	AP	M3574_1.02	0.0211541	0.45	Depth	0.494677
BRCA	ARID5B	11866	AP	M6149_1.02	0.15744	0.1	Depth	0.410039
BRCA	HHEX	12536	AP	M1110_1.02	-0.150626	0.16	Depth	0.44356
BRCA	HHEX	12537	AP	M1110_1.02	0.150626	0.08	Depth	0.398482
BRCA	MXI1	13079	AP	M4543_1.02	0.334197	0	Depth	0
BRCA	MXI1	13079	AP	M4678_1.02	0.345736	0	Depth	0
BRCA	MXI1	13079	AP	M4679_1.02	0.258762	0.02	Depth	0.275872
BRCA	MXI1	13080	AP	M4543_1.02	-0.30356	0.01	Depth	0.203094
BRCA	MXI1	13080	AP	M4678_1.02	-0.326762	0	Depth	0
BRCA	MXI1	13080	AP	M4679_1.02	-0.259102	0.01	Depth	0.203094
BRCA	TCF7L2	13125	ES	M6512_1.02	-0.328223	0.03	Depth	0.320116
BRCA	TCF7L2	13138	ES	M6512_1.02	-0.109799	0.26	Depth	0.463037
BRCA	TCF7L2	13139	ES	M6512_1.02	0.0679543	0.39	Depth	0.483684
BRCA	TCF7L2	13141	ES	M6512_1.02	0.175455	0.03	Depth	0.320116
BRCA	TCF7L2	13142	ES	M6512_1.02	-0.0584985	0.28	Depth	0.464162
BRCA	TCF7L2	13146	ES	M6512_1.02	-0.199199	0.08	Depth	0.398482
BRCA	TCF7L2	13147	ES	M6512_1.02	0.0343547	0.48	Depth	0.505364
BRCA	TCF7L2	13148	ES	M6512_1.02	0.0191871	0.47	Depth	0.501079
BRCA	IRF7	13707	RI	M3480_1.02	0.0641536	0.24	Depth	0.4595
BRCA	IRF7	13707	RI	M5576_1.02	-0.0461777	0.36	Depth	0.474663
BRCA	IRF7	13707	RI	M5577_1.02	-0.00959892	0.49	Depth	0.51005
BRCA	IRF7	13707	RI	M6312_1.02	-0.0212559	0.42	Depth	0.487425
BRCA	IRF7	13715	ES	M3480_1.02	-0.049983	0.36	Depth	0.474663
BRCA	IRF7	13715	ES	M5576_1.02	-0.0042504	0.55	Depth	0.552178
BRCA	IRF7	13715	ES	M5577_1.02	-0.000888586	0.48	Depth	0.505364
BRCA	IRF7	13715	ES	M6312_1.02	-0.00784918	0.57	Depth	0.57101
BRCA	IRF7	13720	RI	M3480_1.02	0.169062	0.14	Depth	0.43632
BRCA	IRF7	13720	RI	M5576_1.02	0.0731382	0.22	Depth	0.456646
BRCA	IRF7	13720	RI	M5577_1.02	0.0852328	0.19	Depth	0.452944
BRCA	IRF7	13720	RI	M6312_1.02	0.0940877	0.26	Depth	0.463037
BRCA	TEAD1	14433	AP	M1916_1.02	0.098259	0.29	Depth	0.466743
BRCA	TEAD1	14433	AP	M5905_1.02	0.0866219	0.32	Depth	0.46856
BRCA	TEAD1	14434	AP	M1916_1.02	-0.098259	0.28	Depth	0.464162
BRCA	TEAD1	14434	AP	M5905_1.02	-0.0866219	0.28	Depth	0.464162
BRCA	TEAD1	14436	ES	M1916_1.02	-0.206132	0.13	Depth	0.430329
BRCA	TEAD1	14436	ES	M5905_1.02	0.0463915	0.37	Depth	0.4769
BRCA	NR1H3	15692	AP	M6383_1.02	-0.0707926	0.31	Depth	0.468376
BRCA	NR1H3	15694	AP	M6383_1.02	0.00993818	0.4	Depth	0.48512
BRCA	NR1H3	15695	AP	M6383_1.02	0.0886187	0.2	Depth	0.455938
BRCA	CREBZF	18138	AA	M0307_1.02	-0.0222127	0.44	Depth	0.491324
BRCA	CREBZF	18139	RI	M0307_1.02	0.137773	0.12	Depth	0.425792
BRCA	CREBZF	18140	RI	M0307_1.02	0.0214441	0.47	Depth	0.501079
BRCA	ETS1	19408	AP	M5418_1.02	0.10777	0.24	Depth	0.4595
BRCA	ETS1	19408	AP	M4461_1.02	-0.106597	0.29	Depth	0.466743
BRCA	ETS1	19408	AP	M5419_1.02	0.276705	0.01	Depth	0.203094
BRCA	ETS1	19409	AP	M5418_1.02	-0.10777	0.22	Depth	0.456646
BRCA	ETS1	19409	AP	M4461_1.02	0.106597	0.17	Depth	0.44765
BRCA	ETS1	19409	AP	M5419_1.02	-0.276705	0	Depth	0
BRCA	FLI1	19413	AP	M5431_1.02	0.00338086	0.42	Depth	0.487425
BRCA	FLI1	19413	AP	M5432_1.02	0.0391765	0.28	Depth	0.464162
BRCA	FLI1	19413	AP	M2277_1.02	-0.0946196	0.18	Depth	0.449969
BRCA	FLI1	19413	AP	M6227_1.02	-0.00960876	0.48	Depth	0.505364
BRCA	FLI1	19416	AP	M5431_1.02	-0.0311988	0.42	Depth	0.487425
BRCA	FLI1	19416	AP	M5432_1.02	-0.0591651	0.35	Depth	0.474663
BRCA	FLI1	19416	AP	M2277_1.02	0.0750462	0.26	Depth	0.463037
BRCA	FLI1	19416	AP	M6227_1.02	-0.0141462	0.42	Depth	0.487425
BRCA	FOXM1	19720	ES	M6244_1.02	0.0461537	0.28	Depth	0.464162
BRCA	FOXM1	19721	ES	M6244_1.02	0.184426	0.03	Depth	0.320116
BRCA	ZNF384	19923	ES	M6557_1.02	0.197114	0.02	Depth	0.275872
BRCA	POU6F1	21805	AP	M3780_1.02	0.0706372	0.32	Depth	0.46856
BRCA	POU6F1	21805	AP	M0899_1.02	-0.0658885	0.32	Depth	0.46856
BRCA	POU6F1	21806	AP	M3780_1.02	-0.158554	0.18	Depth	0.449969
BRCA	POU6F1	21806	AP	M0899_1.02	-0.0151695	0.44	Depth	0.491324
BRCA	NR4A1	21884	AP	M6393_1.02	-0.086916	0.18	Depth	0.449969
BRCA	NR4A1	21887	AP	M6393_1.02	0.0845761	0.28	Depth	0.464162
BRCA	ATF7	22094	AT	M5293_1.02	-0.041629	0.34	Depth	0.472261
BRCA	ATF7	22095	AT	M5293_1.02	0.0676638	0.23	Depth	0.456646
BRCA	HOXC6	22115	AP	M6299_1.02	-0.165114	0.06	Depth	0.374783
BRCA	HOXC6	22116	AP	M6299_1.02	0.165114	0.1	Depth	0.410039
BRCA	DDIT3	22625	RI	M6187_1.02	-0.0181414	0.44	Depth	0.491324
BRCA	DDIT3	22628	RI	M6187_1.02	0.049275	0.33	Depth	0.468733
BRCA	HMGA2	22877	AT	M6280_1.02	-0.0898088	0.25	Depth	0.462506
BRCA	HMGA2	22880	AT	M6280_1.02	-0.0314091	0.46	Depth	0.496757
BRCA	HMGA2	22881	AT	M6280_1.02	0.041684	0.33	Depth	0.468733
BRCA	NR2C1	23741	AT	M6389_1.02	-0.21632	0.03	Depth	0.320116
BRCA	NR2C1	23742	AT	M6389_1.02	0.21632	0.02	Depth	0.275872
BRCA	NFYB	24093	AP	M6372_1.02	-0.234494	0.01	Depth	0.203094
BRCA	NFYB	24094	AP	M6372_1.02	0.234463	0.02	Depth	0.275872
BRCA	TBX5	24649	AP	M5898_1.02	-0.151739	0.13	Depth	0.430329
BRCA	TBX5	24649	AP	M5899_1.02	-0.0480729	0.48	Depth	0.505364
BRCA	TBX5	24650	AP	M5898_1.02	0.151739	0.09	Depth	0.405939
BRCA	TBX5	24650	AP	M5899_1.02	0.0480729	0.35	Depth	0.474663
BRCA	KDM2B	24879	RI	M0607_1.02	-0.0129741	0.47	Depth	0.501079
BRCA	TFDP1	26387	AD	M6515_1.02	0.286444	0.01	Depth	0.203094
BRCA	TFDP1	26388	ES	M6515_1.02	0.115813	0.19	Depth	0.452944
BRCA	ZNF219	26526	AP	M6553_1.02	-0.0366547	0.4	Depth	0.48512
BRCA	ZNF219	26527	AP	M6553_1.02	0.00586269	0.54	Depth	0.54288
BRCA	ZNF219	26528	AP	M6553_1.02	0.0149943	0.45	Depth	0.494677
BRCA	NFATC4	26983	AP	M6365_1.02	0.0620054	0.31	Depth	0.468376
BRCA	NFATC4	26985	AP	M6365_1.02	-0.0539755	0.32	Depth	0.46856
BRCA	NFATC4	26986	AP	M6365_1.02	0.069117	0.27	Depth	0.463037
BRCA	NFATC4	26991	RI	M6365_1.02	-0.0867382	0.29	Depth	0.466743
BRCA	NPAS3	27142	AT	M5234_1.02	-0.226569	0.07	Depth	0.390174
BRCA	NPAS3	27143	AT	M5234_1.02	0.226569	0.01	Depth	0.203094
BRCA	ESR2	27867	AT	M2065_1.02	0.0640207	0.25	Depth	0.462506
BRCA	ESR2	27867	AT	M6219_1.02	-0.105428	0.2	Depth	0.455938
BRCA	ESR2	27868	AT	M2065_1.02	0.0356461	0.42	Depth	0.487425
BRCA	ESR2	27868	AT	M6219_1.02	0.0411551	0.34	Depth	0.472261
BRCA	ESR2	27869	AT	M2065_1.02	-0.0749796	0.31	Depth	0.468376
BRCA	ESR2	27869	AT	M6219_1.02	-0.0323584	0.39	Depth	0.483684
BRCA	ZBTB1	27894	ES	M0413_1.02	0.197661	0.03	Depth	0.320116
BRCA	MAX	27937	RI	M4646_1.02	-0.0278604	0.47	Depth	0.501079
BRCA	MAX	27937	RI	M1889_1.02	-0.226944	0.04	Depth	0.339193
BRCA	MAX	27937	RI	M5613_1.02	-0.0195136	0.45	Depth	0.494677
BRCA	MAX	27942	ES	M4646_1.02	0.206716	0.1	Depth	0.410039
BRCA	MAX	27942	ES	M1889_1.02	0.229935	0.1	Depth	0.410039
BRCA	MAX	27942	ES	M5613_1.02	0.226779	0.11	Depth	0.417512
BRCA	ZNF410	28328	ES	M5972_1.02	-0.0838961	0.31	Depth	0.468376
BRCA	FOXN3	28792	ES	M0726_1.02	0.0432077	0.33	Depth	0.468733
BRCA	FOXN3	28792	ES	M0756_1.02	-0.0646427	0.26	Depth	0.463037
BRCA	FOXN3	28792	ES	M5453_1.02	-0.0828938	0.15	Depth	0.438663
BRCA	FOXN3	28792	ES	M5458_1.02	-0.070303	0.2	Depth	0.455938
BRCA	FOXN3	28792	ES	M6241_1.02	-0.0460861	0.28	Depth	0.464162
BRCA	FOXN3	28792	ES	M3257_1.02	-0.0417122	0.37	Depth	0.4769
BRCA	FOXN3	28792	ES	M6014_1.02	0.0581141	0.23	Depth	0.456646
BRCA	FOXN3	28792	ES	M6242_1.02	-0.169615	0.08	Depth	0.398482
BRCA	FOXN3	28792	ES	M6243_1.02	-0.179102	0.04	Depth	0.339193
BRCA	MEIS2	29906	AP	M5619_1.02	0.0556737	0.31	Depth	0.468376
BRCA	MEIS2	29906	AP	M5620_1.02	0.0560936	0.34	Depth	0.472261
BRCA	MEIS2	29912	ES	M5619_1.02	0.178937	0.09	Depth	0.405939
BRCA	MEIS2	29912	ES	M5620_1.02	-0.0504476	0.3	Depth	0.467189
BRCA	TCF12	30783	AP	M4479_1.02	0.132312	0.12	Depth	0.425792
BRCA	TCF12	30784	AP	M4479_1.02	-0.0962205	0.22	Depth	0.456646
BRCA	TCF12	30789	ES	M4479_1.02	0.0316398	0.31	Depth	0.468376
BRCA	SMAD3	31299	AP	M5808_1.02	-0.234725	0.01	Depth	0.203094
BRCA	SMAD3	31299	AP	M6465_1.02	-0.24239	0.03	Depth	0.320116
BRCA	ARNT2	32182	AP	M6150_1.02	-0.0537547	0.27	Depth	0.463037
BRCA	ARNT2	32183	AP	M6150_1.02	0.0537547	0.39	Depth	0.483684
BRCA	ZNF263	33506	AP	M4604_1.02	-0.0751016	0.27	Depth	0.463037
BRCA	ZNF263	33506	AP	M2324_1.02	-0.102636	0.18	Depth	0.449969
BRCA	ZNF263	33507	AP	M4604_1.02	0.0751016	0.25	Depth	0.462506
BRCA	ZNF263	33507	AP	M2324_1.02	0.102636	0.13	Depth	0.430329
BRCA	ZNF263	33510	ES	M4604_1.02	0.0670377	0.34	Depth	0.472261
BRCA	ZNF263	33510	ES	M2324_1.02	0.0118508	0.42	Depth	0.487425
BRCA	ZNF263	33511	ES	M4604_1.02	-0.0446501	0.34	Depth	0.472261
BRCA	ZNF263	33511	ES	M2324_1.02	-0.14793	0.06	Depth	0.374783
BRCA	ZNF263	33512	ES	M4604_1.02	-0.144854	0.1	Depth	0.410039
BRCA	ZNF263	33512	ES	M2324_1.02	-0.155342	0.1	Depth	0.410039
BRCA	ZNF263	33513	ES	M4604_1.02	0.113984	0.13	Depth	0.430329
BRCA	ZNF263	33513	ES	M2324_1.02	0.0559802	0.24	Depth	0.4595
BRCA	ZNF263	33515	ES	M4604_1.02	-0.0951879	0.24	Depth	0.4595
BRCA	ZNF263	33515	ES	M2324_1.02	-0.0997948	0.32	Depth	0.46856
BRCA	MAZ	35937	AP	M6336_1.02	-0.0769345	0.29	Depth	0.466743
BRCA	MAZ	35938	AP	M6336_1.02	0.0881599	0.21	Depth	0.456646
BRCA	HSF4	36941	RI	M5567_1.02	-0.178474	0.04	Depth	0.339193
BRCA	NFATC3	37186	ES	M1517_1.02	0.0621848	0.22	Depth	0.456646
BRCA	NFAT5	37293	ES	M5655_1.02	0.0377113	0.44	Depth	0.491324
BRCA	NFAT5	37293	ES	M6366_1.02	0.00910274	0.54	Depth	0.54288
BRCA	NFAT5	37296	ES	M5655_1.02	-0.0255099	0.44	Depth	0.491324
BRCA	NFAT5	37296	ES	M6366_1.02	-0.00168197	0.42	Depth	0.487425
BRCA	ZFHX3	37557	AP	M0895_1.02	0.231358	0.01	Depth	0.203094
BRCA	ZFHX3	37557	AP	M6546_1.02	0.202917	0.03	Depth	0.320116
BRCA	ZFHX3	37558	AP	M0895_1.02	-0.231358	0.06	Depth	0.374783
BRCA	ZFHX3	37558	AP	M6546_1.02	-0.202917	0.07	Depth	0.390174
BRCA	MAF	37687	RI	M6332_1.02	-0.0495964	0.33	Depth	0.468733
BRCA	ZNF232	38656	RI	M5967_1.02	-0.0593925	0.3	Depth	0.467189
BRCA	SOX15	39008	AT	M5818_1.02	0.0268028	0.41	Depth	0.486495
BRCA	SOX15	39008	AT	M5819_1.02	0.0561068	0.25	Depth	0.462506
BRCA	SOX15	39008	AT	M5820_1.02	0.0462264	0.31	Depth	0.468376
BRCA	SOX15	39008	AT	M6472_1.02	0.0608607	0.25	Depth	0.462506
BRCA	SOX15	39009	AT	M5818_1.02	-0.0268028	0.38	Depth	0.480523
BRCA	SOX15	39009	AT	M5819_1.02	-0.0561068	0.32	Depth	0.46856
BRCA	SOX15	39009	AT	M5820_1.02	-0.0462264	0.46	Depth	0.496757
BRCA	SOX15	39009	AT	M6472_1.02	-0.0608607	0.24	Depth	0.4595
BRCA	SREBF1	39500	AP	M2387_1.02	-0.0703779	0.37	Depth	0.4769
BRCA	SREBF1	39500	AP	M3944_1.02	0.0229245	0.49	Depth	0.51005
BRCA	SREBF1	39501	AP	M2387_1.02	0.0703779	0.3	Depth	0.467189
BRCA	SREBF1	39501	AP	M3944_1.02	-0.0229245	0.46	Depth	0.496757
BRCA	RARA	40857	AP	M5763_1.02	0.162904	0.08	Depth	0.398482
BRCA	RARA	40857	AP	M5762_1.02	0.00503521	0.51	Depth	0.521273
BRCA	RARA	40857	AP	M5761_1.02	0.20049	0.02	Depth	0.275872
BRCA	RARA	40857	AP	M6443_1.02	0.0484713	0.37	Depth	0.4769
BRCA	RARA	40858	AP	M5763_1.02	-0.401277	0	Depth	0
BRCA	RARA	40858	AP	M5762_1.02	-0.0989567	0.23	Depth	0.456646
BRCA	RARA	40858	AP	M5761_1.02	-0.228569	0.02	Depth	0.275872
BRCA	RARA	40858	AP	M6443_1.02	-0.128724	0.09	Depth	0.405939
BRCA	RARA	40859	AP	M5763_1.02	0.320627	0	Depth	0
BRCA	RARA	40859	AP	M5762_1.02	0.230866	0.03	Depth	0.320116
BRCA	RARA	40859	AP	M5761_1.02	0.0572537	0.33	Depth	0.468733
BRCA	RARA	40859	AP	M6443_1.02	0.218011	0.03	Depth	0.320116
BRCA	NFE2L1	42157	AP	M4030_1.02	-0.0308184	0.4	Depth	0.48512
BRCA	NFE2L1	42158	AP	M4030_1.02	0.0347871	0.41	Depth	0.486495
BRCA	NFE2L1	42160	ES	M4030_1.02	0.306615	0	Depth	0
BRCA	HOXB3	42192	AP	M5542_1.02	-0.06952	0.25	Depth	0.462506
BRCA	HOXB3	42208	ES	M5542_1.02	-0.149124	0.21	Depth	0.456646
BRCA	HLF	42576	AP	M3393_1.02	-0.280655	0.01	Depth	0.203094
BRCA	HLF	42579	AP	M3393_1.02	0.306748	0	Depth	0
BRCA	BPTF	43116	AD	M3234_1.02	-0.10214	0.2	Depth	0.455938
BRCA	BPTF	43116	AD	M6163_1.02	-0.0405331	0.34	Depth	0.472261
BRCA	BPTF	43117	ES	M3234_1.02	-0.0271241	0.39	Depth	0.483684
BRCA	BPTF	43117	ES	M6163_1.02	-0.0264328	0.4	Depth	0.48512
BRCA	TGIF1	44497	AP	M4064_1.02	-0.0278267	0.39	Depth	0.483684
BRCA	TGIF1	44497	AP	M5933_1.02	0.0687301	0.23	Depth	0.456646
BRCA	TGIF1	44497	AP	M6519_1.02	0.234358	0.03	Depth	0.320116
BRCA	TGIF1	44497	AP	M6520_1.02	0.0433173	0.35	Depth	0.474663
BRCA	TGIF1	44502	AP	M4064_1.02	0.0950019	0.22	Depth	0.456646
BRCA	TGIF1	44502	AP	M5933_1.02	0.098023	0.18	Depth	0.449969
BRCA	TGIF1	44502	AP	M6519_1.02	-0.0269974	0.34	Depth	0.472261
BRCA	TGIF1	44502	AP	M6520_1.02	0.0339578	0.39	Depth	0.483684
BRCA	TGIF1	44512	ES	M4064_1.02	0.0299228	0.47	Depth	0.501079
BRCA	TGIF1	44512	ES	M5933_1.02	0.104079	0.21	Depth	0.456646
BRCA	TGIF1	44512	ES	M6519_1.02	-0.0545115	0.35	Depth	0.474663
BRCA	TGIF1	44512	ES	M6520_1.02	-0.0593252	0.37	Depth	0.4769
BRCA	ZBTB7C	45452	AP	M5962_1.02	-0.102266	0.2	Depth	0.455938
BRCA	ZBTB7C	45453	AP	M5962_1.02	0.0548567	0.35	Depth	0.474663
BRCA	ZBTB7C	45454	AP	M5962_1.02	0.0881248	0.27	Depth	0.463037
BRCA	SMAD4	45557	AP	M6466_1.02	0.056113	0.25	Depth	0.462506
BRCA	SMAD4	45559	AP	M6466_1.02	-0.125628	0.13	Depth	0.430329
BRCA	TCF4	45611	AP	M5901_1.02	-0.00493864	0.39	Depth	0.483684
BRCA	NFIC	46675	AP	M1970_1.02	0.106379	0.11	Depth	0.417512
BRCA	NFIC	46676	AP	M1970_1.02	-0.106379	0.18	Depth	0.449969
BRCA	RFX2	47010	ES	M2392_1.02	0.120316	0.19	Depth	0.452944
BRCA	RFX2	47010	ES	M1527_1.02	0.163934	0.12	Depth	0.425792
BRCA	RFX2	47010	ES	M5774_1.02	0.123517	0.26	Depth	0.463037
BRCA	RFX2	47010	ES	M6452_1.02	0.120849	0.25	Depth	0.462506
BRCA	NFIX	47900	AP	M5664_1.02	-0.44066	0	Depth	0
BRCA	NFIX	47900	AP	M5666_1.02	-0.31542	0	Depth	0
BRCA	NFIX	47903	AP	M5664_1.02	0.353858	0	Depth	0
BRCA	NFIX	47903	AP	M5666_1.02	0.276918	0	Depth	0
BRCA	NFIX	47907	ES	M5664_1.02	-0.112273	0.13	Depth	0.430329
BRCA	NFIX	47907	ES	M5666_1.02	-0.0347289	0.49	Depth	0.51005
BRCA	MEF2B	48596	ES	M5616_1.02	0.167339	0.05	Depth	0.363241
BRCA	CEBPG	48937	AP	M5318_1.02	0.236865	0.01	Depth	0.203094
BRCA	CEBPG	48937	AP	M6173_1.02	0.215197	0.02	Depth	0.275872
BRCA	CEBPG	48938	AP	M5318_1.02	-0.236865	0.06	Depth	0.374783
BRCA	CEBPG	48938	AP	M6173_1.02	-0.215197	0.04	Depth	0.339193
BRCA	CIC	50142	AP	M1581_1.02	-0.0536038	0.36	Depth	0.474663
BRCA	CIC	50143	AP	M1581_1.02	0.0536038	0.31	Depth	0.468376
BRCA	FOSB	50453	AD	M6228_1.02	-0.342402	0.06	Depth	0.374783
BRCA	MEIS3	50642	AT	M5621_1.02	0.0343725	0.43	Depth	0.489072
BRCA	MEIS3	50642	AT	M5622_1.02	0.0789485	0.32	Depth	0.46856
BRCA	MEIS3	50643	AT	M5621_1.02	-0.0343725	0.46	Depth	0.496757
BRCA	MEIS3	50643	AT	M5622_1.02	-0.0789485	0.25	Depth	0.462506
BRCA	MEIS3	50645	AA	M5621_1.02	-0.167838	0.15	Depth	0.438663
BRCA	MEIS3	50645	AA	M5622_1.02	-0.0971958	0.18	Depth	0.449969
BRCA	IRF3	50988	AD	M5572_1.02	-0.0735146	0.26	Depth	0.463037
BRCA	IRF3	50988	AD	M6309_1.02	-0.143564	0.07	Depth	0.390174
BRCA	IRF3	50997	AD	M5572_1.02	0.101687	0.2	Depth	0.455938
BRCA	IRF3	50997	AD	M6309_1.02	0.163076	0.11	Depth	0.417512
BRCA	IRF3	51006	ES	M5572_1.02	0.0362125	0.32	Depth	0.46856
BRCA	IRF3	51006	ES	M6309_1.02	-0.0653431	0.27	Depth	0.463037
BRCA	IRF3	51007	ES	M5572_1.02	0.0596138	0.32	Depth	0.46856
BRCA	IRF3	51007	ES	M6309_1.02	0.0178298	0.43	Depth	0.489072
BRCA	IRF3	51008	ES	M5572_1.02	-0.0654356	0.32	Depth	0.46856
BRCA	IRF3	51008	ES	M6309_1.02	-0.131212	0.2	Depth	0.455938
BRCA	IRF3	51011	ES	M5572_1.02	0.00922152	0.53	Depth	0.535242
BRCA	IRF3	51011	ES	M6309_1.02	-0.0647433	0.33	Depth	0.468733
BRCA	IRF3	51012	ES	M5572_1.02	-0.0406081	0.33	Depth	0.468733
BRCA	IRF3	51012	ES	M6309_1.02	-0.0929148	0.2	Depth	0.455938
BRCA	IRF3	51030	RI	M5572_1.02	0.0654701	0.33	Depth	0.468733
BRCA	IRF3	51030	RI	M6309_1.02	-0.0876826	0.23	Depth	0.456646
BRCA	IRF3	51032	AA	M5572_1.02	0.0536323	0.37	Depth	0.4769
BRCA	IRF3	51032	AA	M6309_1.02	-0.0895619	0.32	Depth	0.46856
BRCA	IRF3	51033	RI	M5572_1.02	0.00472418	0.46	Depth	0.496757
BRCA	IRF3	51033	RI	M6309_1.02	-0.0944983	0.19	Depth	0.452944
BRCA	ATF5	51133	AP	M6154_1.02	0.0662584	0.3	Depth	0.467189
BRCA	ATF5	51134	AP	M6154_1.02	-0.0662584	0.29	Depth	0.466743
BRCA	MZF1	52487	AT	M3594_1.02	0.144182	0.1	Depth	0.410039
BRCA	MZF1	52487	AT	M1888_1.02	0.232821	0.01	Depth	0.203094
BRCA	MZF1	52488	AT	M3594_1.02	-0.144182	0.14	Depth	0.43632
BRCA	MZF1	52488	AT	M1888_1.02	-0.232821	0.03	Depth	0.320116
BRCA	MZF1	52490	AD	M3594_1.02	-0.030818	0.42	Depth	0.487425
BRCA	MZF1	52490	AD	M1888_1.02	-0.0240609	0.33	Depth	0.468733
BRCA	GRHL1	52643	AP	M5498_1.02	0.262483	0.02	Depth	0.275872
BRCA	GRHL1	52643	AP	M5497_1.02	0.263304	0.02	Depth	0.275872
BRCA	GRHL1	52644	AP	M5498_1.02	-0.262483	0	Depth	0
BRCA	GRHL1	52644	AP	M5497_1.02	-0.263304	0.03	Depth	0.320116
BRCA	E2F6	52690	ES	M4615_1.02	-0.619048	0	Depth	0
BRCA	E2F6	52691	ES	M4615_1.02	-0.188961	0.04	Depth	0.339193
BRCA	E2F6	52692	ES	M4615_1.02	-0.46958	0	Depth	0
BRCA	E2F6	52694	ES	M4615_1.02	-0.423503	0	Depth	0
BRCA	FOSL2	53057	AP	M2280_1.02	0.283514	0	Depth	0
BRCA	FOSL2	53059	AP	M2280_1.02	-0.283127	0	Depth	0
BRCA	MEIS1	53813	AA	M3562_1.02	-0.126272	0.18	Depth	0.449969
BRCA	MEIS1	53813	AA	M6343_1.02	-0.0652512	0.28	Depth	0.464162
BRCA	MEIS1	53814	AD	M3562_1.02	-0.10264	0.15	Depth	0.438663
BRCA	MEIS1	53814	AD	M6343_1.02	0.0139035	0.46	Depth	0.496757
BRCA	MEIS1	53815	ES	M3562_1.02	0.122309	0.2	Depth	0.455938
BRCA	MEIS1	53815	ES	M6343_1.02	0.063534	0.31	Depth	0.468376
BRCA	NR4A2	55613	AP	M5687_1.02	0.0202396	0.39	Depth	0.483684
BRCA	NR4A2	55613	AP	M5685_1.02	0.0623231	0.34	Depth	0.472261
BRCA	NR4A2	55613	AP	M5686_1.02	0.138052	0.1	Depth	0.410039
BRCA	NR4A2	55614	AP	M5687_1.02	-0.0236334	0.48	Depth	0.505364
BRCA	NR4A2	55614	AP	M5685_1.02	-0.0742323	0.19	Depth	0.452944
BRCA	NR4A2	55614	AP	M5686_1.02	-0.153849	0.12	Depth	0.425792
BRCA	STAT1	56598	ES	M6493_1.02	0.135887	0.1	Depth	0.410039
BRCA	STAT1	56598	ES	M3966_1.02	0.0949495	0.19	Depth	0.452944
BRCA	STAT1	56598	ES	M3968_1.02	-0.124909	0.19	Depth	0.452944
BRCA	STAT1	56598	ES	M4707_1.02	-0.0161997	0.46	Depth	0.496757
BRCA	NFATC2	59798	AP	M1518_1.02	-0.250532	0.06	Depth	0.374783
BRCA	NFATC2	59799	AP	M1518_1.02	0.250532	0.06	Depth	0.374783
BRCA	NFATC2	59802	AA	M1518_1.02	0.177741	0.3	Depth	0.467189
BRCA	TFAP2C	59883	AP	M2939_1.02	0.12654	0.15	Depth	0.438663
BRCA	TFAP2C	59883	AP	M2320_1.02	0.159911	0.06	Depth	0.374783
BRCA	TFAP2C	59883	AP	M5920_1.02	0.142314	0.09	Depth	0.405939
BRCA	TFAP2C	59883	AP	M5921_1.02	0.12691	0.09	Depth	0.405939
BRCA	TFAP2C	59883	AP	M5922_1.02	0.165629	0.05	Depth	0.363241
BRCA	TFAP2C	59884	AP	M2939_1.02	-0.12654	0.1	Depth	0.410039
BRCA	TFAP2C	59884	AP	M2320_1.02	-0.159911	0.08	Depth	0.398482
BRCA	TFAP2C	59884	AP	M5920_1.02	-0.142314	0.11	Depth	0.417512
BRCA	TFAP2C	59884	AP	M5921_1.02	-0.12691	0.14	Depth	0.43632
BRCA	TFAP2C	59884	AP	M5922_1.02	-0.165629	0.1	Depth	0.410039
BRCA	CTCFL	59905	AT	M4612_1.02	-0.0944786	0.19	Depth	0.452944
BRCA	CTCFL	59907	AT	M4612_1.02	0.0874088	0.21	Depth	0.456646
BRCA	GABPA	60277	AP	M4505_1.02	-0.050322	0.31	Depth	0.468376
BRCA	GABPA	60278	AP	M4505_1.02	0.050322	0.37	Depth	0.4769
BRCA	ERG	60587	AP	M5399_1.02	0.105794	0.14	Depth	0.43632
BRCA	ERG	60587	AP	M5400_1.02	0.0975757	0.18	Depth	0.449969
BRCA	ERG	60589	AP	M5399_1.02	-0.137712	0.19	Depth	0.452944
BRCA	ERG	60589	AP	M5400_1.02	-0.138023	0.11	Depth	0.417512
BRCA	ERG	60598	ES	M5399_1.02	-0.0826657	0.24	Depth	0.4595
BRCA	ERG	60598	ES	M5400_1.02	-0.18212	0.04	Depth	0.339193
BRCA	XBP1	61563	RI	M5953_1.02	0.490166	0	Depth	0
BRCA	XBP1	61563	RI	M5952_1.02	0.552768	0	Depth	0
BRCA	PATZ1	61848	ES	M3546_1.02	-0.120444	0.16	Depth	0.44356
BRCA	MAFF	62214	AP	M4572_1.02	0.0295887	0.39	Depth	0.483684
BRCA	MAFF	62214	AP	M2295_1.02	0.0334146	0.44	Depth	0.491324
BRCA	MAFF	62216	AP	M4572_1.02	-0.0200858	0.42	Depth	0.487425
BRCA	MAFF	62216	AP	M2295_1.02	-0.046188	0.36	Depth	0.474663
BRCA	TEF	62421	AP	M5910_1.02	-0.365939	0	Depth	0
BRCA	TEF	62421	AP	M6510_1.02	-0.0656672	0.3	Depth	0.467189
BRCA	TEF	62422	AP	M5910_1.02	0.365939	0	Depth	0
BRCA	TEF	62422	AP	M6510_1.02	0.0656672	0.36	Depth	0.474663
BRCA	PPARG	63413	AP	M1894_1.02	0.0144458	0.5	Depth	0.515062
BRCA	PPARG	63413	AP	M3783_1.02	0.0119099	0.44	Depth	0.491324
BRCA	PPARG	63413	AP	M3785_1.02	0.0952791	0.32	Depth	0.46856
BRCA	PPARG	63413	AP	M6433_1.02	-0.00507189	0.45	Depth	0.494677
BRCA	PPARG	63413	AP	M6434_1.02	-0.0126797	0.46	Depth	0.496757
BRCA	PPARG	63414	AP	M1894_1.02	-0.0432579	0.37	Depth	0.4769
BRCA	PPARG	63414	AP	M3783_1.02	-0.0204525	0.54	Depth	0.54288
BRCA	PPARG	63414	AP	M3785_1.02	-0.0863348	0.25	Depth	0.462506
BRCA	PPARG	63414	AP	M6433_1.02	-0.061991	0.29	Depth	0.466743
BRCA	PPARG	63414	AP	M6434_1.02	0.0258824	0.52	Depth	0.527461
BRCA	PPARG	63425	ES	M1894_1.02	0.20649	0.08	Depth	0.398482
BRCA	PPARG	63425	ES	M3783_1.02	0.131073	0.21	Depth	0.456646
BRCA	PPARG	63425	ES	M3785_1.02	0.245551	0.08	Depth	0.398482
BRCA	PPARG	63425	ES	M6433_1.02	0.188465	0.14	Depth	0.43632
BRCA	PPARG	63425	ES	M6434_1.02	0.296459	0.03	Depth	0.320116
BRCA	RARB	63743	AP	M5764_1.02	-0.171775	0.06	Depth	0.374783
BRCA	RARB	63743	AP	M6445_1.02	-0.10145	0.23	Depth	0.456646
BRCA	RARB	63744	AP	M5764_1.02	0.145386	0.14	Depth	0.43632
BRCA	RARB	63744	AP	M6445_1.02	0.104523	0.19	Depth	0.452944
BRCA	BCL6	68079	AP	M6159_1.02	0.068582	0.27	Depth	0.463037
BRCA	BCL6	68081	AP	M6159_1.02	-0.068582	0.29	Depth	0.466743
BRCA	RBPJ	68986	AD	M6499_1.02	-0.0295468	0.41	Depth	0.486495
BRCA	CLOCK	69331	ES	M5321_1.02	-0.142929	0.1	Depth	0.410039
BRCA	LIN54	69750	AP	M0594_1.02	0.0317049	0.41	Depth	0.486495
BRCA	LIN54	69751	AP	M0594_1.02	-0.0317049	0.41	Depth	0.486495
BRCA	LIN54	69760	AD	M0594_1.02	0.0587918	0.32	Depth	0.46856
BRCA	LEF1	70286	AP	M5596_1.02	0.10036	0.21	Depth	0.456646
BRCA	LEF1	70286	AP	M6327_1.02	0.160991	0.08	Depth	0.398482
BRCA	LEF1	70287	AP	M5596_1.02	-0.1007	0.18	Depth	0.449969
BRCA	LEF1	70287	AP	M6327_1.02	-0.16133	0.07	Depth	0.390174
BRCA	LEF1	70294	ES	M5596_1.02	-0.0519516	0.39	Depth	0.483684
BRCA	LEF1	70294	ES	M6327_1.02	-0.130064	0.17	Depth	0.44765
BRCA	AHRR	71433	AT	M2917_1.02	0.226721	0.02	Depth	0.275872
BRCA	AHRR	71434	AT	M2917_1.02	-0.226721	0.06	Depth	0.374783
BRCA	TCF7	73350	ES	M6506_1.02	-0.0597797	0.35	Depth	0.474663
BRCA	RREB1	75253	ES	M1901_1.02	-0.00240652	0.48	Depth	0.505364
BRCA	RREB1	75253	ES	M3843_1.02	0.033537	0.4	Depth	0.48512
BRCA	HMGA1	75775	ES	M6279_1.02	0.0322041	0.44	Depth	0.491324
BRCA	ZNF76	75903	AA	M1915_1.02	-0.084318	0.24	Depth	0.4595
BRCA	NFYA	76094	ES	M1890_1.02	-0.126054	0.11	Depth	0.417512
BRCA	NFYA	76094	ES	M3628_1.02	-0.0405521	0.31	Depth	0.468376
BRCA	TFEB	76118	AP	M5931_1.02	0.15421	0.08	Depth	0.398482
BRCA	TFEB	76121	AP	M5931_1.02	-0.0407515	0.43	Depth	0.489072
BRCA	TFEB	76122	AP	M5931_1.02	-0.039286	0.35	Depth	0.474663
BRCA	RUNX2	76398	AP	M2310_1.02	0.0101947	0.49	Depth	0.51005
BRCA	RUNX2	76398	AP	M5788_1.02	-0.0216134	0.46	Depth	0.496757
BRCA	RUNX2	76398	AP	M5789_1.02	0.0748503	0.22	Depth	0.456646
BRCA	RUNX2	76398	AP	M5790_1.02	-0.0416171	0.32	Depth	0.46856
BRCA	RUNX2	76399	AP	M2310_1.02	-0.0101947	0.49	Depth	0.51005
BRCA	RUNX2	76399	AP	M5788_1.02	0.0216134	0.46	Depth	0.496757
BRCA	RUNX2	76399	AP	M5789_1.02	-0.0748503	0.35	Depth	0.474663
BRCA	RUNX2	76399	AP	M5790_1.02	0.0416171	0.3	Depth	0.467189
BRCA	TFAP2B	76460	ES	M5917_1.02	0.00806117	0.44	Depth	0.491324
BRCA	TFAP2B	76460	ES	M5918_1.02	0.0320076	0.35	Depth	0.474663
BRCA	TFAP2B	76460	ES	M5919_1.02	-0.0823899	0.2	Depth	0.455938
BRCA	TFAP2B	76460	ES	M6144_1.02	-0.147116	0.2	Depth	0.455938
BRCA	TBX18	76914	AT	M5880_1.02	0.075094	0.21	Depth	0.456646
BRCA	TBX18	76914	AT	M5881_1.02	-0.110896	0.17	Depth	0.44765
BRCA	TBX18	76915	AT	M5880_1.02	-0.075094	0.24	Depth	0.4595
BRCA	TBX18	76915	AT	M5881_1.02	0.110896	0.2	Depth	0.455938
BRCA	PRDM1	77110	AP	M2307_1.02	0.345289	0.01	Depth	0.203094
BRCA	PRDM1	77110	AP	M4686_1.02	0.381619	0	Depth	0
BRCA	PRDM1	77110	AP	M4687_1.02	0.247833	0.05	Depth	0.363241
BRCA	PRDM1	77111	AP	M2307_1.02	-0.345289	0.01	Depth	0.203094
BRCA	PRDM1	77111	AP	M4686_1.02	-0.381619	0	Depth	0
BRCA	PRDM1	77111	AP	M4687_1.02	-0.247833	0.07	Depth	0.390174
BRCA	PRDM1	77112	ES	M2307_1.02	-0.0141163	0.35	Depth	0.474663
BRCA	PRDM1	77112	ES	M4686_1.02	-0.294184	0.11	Depth	0.417512
BRCA	PRDM1	77112	ES	M4687_1.02	-0.0197628	0.49	Depth	0.51005
BRCA	HSF2	77374	ES	M5566_1.02	-0.148158	0.11	Depth	0.417512
BRCA	HSF2	77374	ES	M3444_1.02	-0.0573223	0.26	Depth	0.463037
BRCA	MYB	77817	ES	M3585_1.02	-0.0869304	0.29	Depth	0.466743
BRCA	MYB	77817	ES	M3068_1.02	-0.233211	0.01	Depth	0.203094
BRCA	MYB	77818	ES	M3585_1.02	-0.302033	0	Depth	0
BRCA	MYB	77818	ES	M3068_1.02	-0.083587	0.32	Depth	0.46856
BRCA	MYB	77835	ES	M3585_1.02	-0.109273	0.11	Depth	0.417512
BRCA	MYB	77835	ES	M3068_1.02	-0.019249	0.48	Depth	0.505364
BRCA	PLAGL1	77989	AP	M6422_1.02	0.0503199	0.45	Depth	0.494677
BRCA	PLAGL1	77994	AP	M6422_1.02	0.00330015	0.54	Depth	0.54288
BRCA	PLAGL1	78001	RI	M6422_1.02	-0.0483906	0.39	Depth	0.483684
BRCA	PLAGL1	78006	AA	M6422_1.02	-0.185796	0.1	Depth	0.410039
BRCA	PLAGL1	78007	AA	M6422_1.02	-0.0529624	0.39	Depth	0.483684
BRCA	PLAGL1	78018	ES	M6422_1.02	-0.318917	0.07	Depth	0.390174
BRCA	ESR1	78162	AP	M6217_1.02	0.158989	0.12	Depth	0.425792
BRCA	ESR1	78162	AP	M4697_1.02	-0.0388876	0.38	Depth	0.480523
BRCA	ESR1	78162	AP	M3206_1.02	0.132174	0.14	Depth	0.43632
BRCA	ESR1	78163	AP	M6217_1.02	0.0247216	0.41	Depth	0.486495
BRCA	ESR1	78163	AP	M4697_1.02	0.0432508	0.32	Depth	0.46856
BRCA	ESR1	78163	AP	M3206_1.02	-0.0678763	0.26	Depth	0.463037
BRCA	MAFK	78580	AP	M4573_1.02	-0.102487	0.22	Depth	0.456646
BRCA	MAFK	78580	AP	M5609_1.02	-0.0585892	0.25	Depth	0.462506
BRCA	MAFK	78580	AP	M6334_1.02	-0.0480147	0.4	Depth	0.48512
BRCA	MAFK	78581	AP	M4573_1.02	0.102487	0.21	Depth	0.456646
BRCA	MAFK	78581	AP	M5609_1.02	0.0585892	0.29	Depth	0.466743
BRCA	MAFK	78581	AP	M6334_1.02	0.0480147	0.3	Depth	0.467189
BRCA	ETV1	78827	AP	M5420_1.02	-0.0528474	0.42	Depth	0.487425
BRCA	ETV1	78828	AP	M5420_1.02	0.16087	0.14	Depth	0.43632
BRCA	IKZF1	79684	ES	M3450_1.02	0.064171	0.39	Depth	0.483684
BRCA	IKZF1	79684	ES	M3525_1.02	0.113088	0.33	Depth	0.468733
BRCA	FOXP2	81479	AT	M2385_1.02	-0.123987	0.13	Depth	0.430329
BRCA	TFEC	81515	AP	M5932_1.02	0.165379	0.15	Depth	0.438663
BRCA	TFEC	81516	AP	M5932_1.02	-0.165379	0.12	Depth	0.425792
BRCA	TFEC	81520	RI	M5932_1.02	0.164684	0.13	Depth	0.430329
BRCA	IRF5	81735	ES	M5574_1.02	-0.0146405	0.44	Depth	0.491324
BRCA	IRF5	81735	ES	M5575_1.02	-0.00456203	0.55	Depth	0.552178
BRCA	IRF5	81735	ES	M6311_1.02	-0.0683731	0.27	Depth	0.463037
BRCA	SOX7	82607	AP	M5835_1.02	-0.0233151	0.47	Depth	0.501079
BRCA	SOX7	82607	AP	M5836_1.02	0.0153076	0.41	Depth	0.486495
BRCA	SOX7	82607	AP	M5837_1.02	0.0345385	0.36	Depth	0.474663
BRCA	SOX7	82608	AP	M5835_1.02	0.0233151	0.49	Depth	0.51005
BRCA	SOX7	82608	AP	M5836_1.02	-0.0153076	0.48	Depth	0.505364
BRCA	SOX7	82608	AP	M5837_1.02	-0.0345385	0.34	Depth	0.472261
BRCA	OSR2	84664	AA	M0396_1.02	0.169209	0.07	Depth	0.390174
BRCA	KLF10	84779	AP	M5591_1.02	0.000844132	0.5	Depth	0.515062
BRCA	KLF10	84780	AP	M5591_1.02	-0.000844132	0.5	Depth	0.515062
BRCA	NFIB	85879	AP	M5662_1.02	0.0441186	0.35	Depth	0.474663
BRCA	NFIB	85881	AP	M5662_1.02	-0.0441186	0.43	Depth	0.489072
BRCA	NFIB	85885	AD	M5662_1.02	0.215177	0.06	Depth	0.374783
BRCA	NFIB	85888	ES	M5662_1.02	0.123411	0.17	Depth	0.44765
BRCA	NFIB	85891	ES	M5662_1.02	0.174254	0.1	Depth	0.410039
BRCA	PBX3	87588	AP	M4473_1.02	-0.0382299	0.42	Depth	0.487425
BRCA	PBX3	87589	AP	M4473_1.02	0.0382299	0.4	Depth	0.48512
BRCA	RXRA	88094	AP	M5795_1.02	-0.210568	0.05	Depth	0.363241
BRCA	RXRA	88094	AP	M4576_1.02	-0.0597287	0.33	Depth	0.468733
BRCA	RXRA	88094	AP	M5796_1.02	-0.0509908	0.34	Depth	0.472261
BRCA	RXRA	88095	AP	M5795_1.02	0.210568	0.02	Depth	0.275872
BRCA	RXRA	88095	AP	M4576_1.02	0.0597287	0.2	Depth	0.455938
BRCA	RXRA	88095	AP	M5796_1.02	0.0509908	0.27	Depth	0.463037
BRCA	ELK1	88937	ES	M5380_1.02	-0.115529	0.11	Depth	0.417512
BRCA	ELK1	88937	ES	M5382_1.02	-0.197308	0.05	Depth	0.363241
BRCA	TFE3	89056	AA	M5930_1.02	-0.264243	0.02	Depth	0.275872
BRCA	TFE3	89056	AA	M6517_1.02	-0.266657	0.02	Depth	0.275872
BRCA	NR1H3	92557	AD	M6383_1.02	0.135609	0.35	Depth	0.474663
BRCA	ZNF263	93848	ES	M4604_1.02	-0.0663811	0.34	Depth	0.472261
BRCA	ZNF263	93848	ES	M2324_1.02	-0.0968383	0.34	Depth	0.472261
BRCA	TCF3	94884	ES	M3155_1.02	0.0846851	0.3	Depth	0.467189
BRCA	TCF3	94884	ES	M3154_1.02	-0.0979728	0.23	Depth	0.456646
BRCA	TCF3	94884	ES	M6516_1.02	-0.0303025	0.38	Depth	0.480523
BRCA	TCF3	94886	ES	M3155_1.02	-0.205859	0.04	Depth	0.339193
BRCA	TCF3	94886	ES	M3154_1.02	0.0169173	0.46	Depth	0.496757
BRCA	TCF3	94886	ES	M6516_1.02	-0.162173	0.14	Depth	0.43632
BRCA	TCF3	94888	ES	M3155_1.02	-0.103254	0.21	Depth	0.456646
BRCA	TCF3	94888	ES	M3154_1.02	-0.0397978	0.27	Depth	0.463037
BRCA	TCF3	94888	ES	M6516_1.02	-0.0469925	0.38	Depth	0.480523
BRCA	BPTF	99447	ES	M3234_1.02	0.119887	0.19	Depth	0.452944
BRCA	BPTF	99447	ES	M6163_1.02	0.133771	0.27	Depth	0.463037
BRCA	NFIC	100455	ES	M1970_1.02	0.0378049	0.4	Depth	0.48512
BRCA	ZBTB7B	101301	ES	M5961_1.02	0.0652885	0.38	Depth	0.480523
BRCA	ZBTB7B	101301	ES	M6539_1.02	-0.0764626	0.3	Depth	0.467189
BRCA	ZBTB7B	101303	ES	M5961_1.02	0.101845	0.22	Depth	0.456646
BRCA	ZBTB7B	101303	ES	M6539_1.02	0.0480785	0.38	Depth	0.480523
BRCA	ZKSCAN3	101314	ES	M5971_1.02	-0.00650619	0.46	Depth	0.496757
BRCA	BPTF	101580	ES	M3234_1.02	-0.00599353	0.54	Depth	0.54288
BRCA	BPTF	101580	ES	M6163_1.02	0.0603634	0.34	Depth	0.472261
BRCA	BPTF	101581	ES	M3234_1.02	-0.0113067	0.56	Depth	0.561681
BRCA	BPTF	101581	ES	M6163_1.02	-0.0521014	0.43	Depth	0.489072
BRCA	ZBTB7B	115179	ES	M5961_1.02	0.169163	0.13	Depth	0.430329
BRCA	ZBTB7B	115179	ES	M6539_1.02	0.0802611	0.32	Depth	0.46856
BRCA	TCF7L2	151705	ME	M6512_1.02	0.102336	0.23	Depth	0.456646
BRCA	BPTF	655196	ES	M3234_1.02	-0.0550427	0.38	Depth	0.480523
BRCA	BPTF	655196	ES	M6163_1.02	-0.00307692	0.43	Depth	0.489072
BRCA	BPTF	655200	ES	M3234_1.02	-0.0123101	0.41	Depth	0.486495
BRCA	BPTF	655200	ES	M6163_1.02	0.0169263	0.43	Depth	0.489072
COAD	HES4	6	RI	M0191_1.02	-0.0167151	0.5	Depth	0.515062
COAD	HES2	400	AT	M0199_1.02	0.0883029	0.3	Depth	0.467189
COAD	HES2	401	AT	M0199_1.02	-0.0883029	0.32	Depth	0.46856
COAD	FOXJ3	2064	AP	M5456_1.02	0.0741024	0.29	Depth	0.466743
COAD	FOXJ3	2064	AP	M5457_1.02	0.0930481	0.24	Depth	0.4595
COAD	FOXJ3	2064	AP	M5458_1.02	0.131245	0.2	Depth	0.455938
COAD	FOXJ3	2064	AP	M6242_1.02	0.070741	0.31	Depth	0.468376
COAD	FOXJ3	2064	AP	M6243_1.02	-0.0102368	0.48	Depth	0.505364
COAD	FOXJ3	2067	AP	M5456_1.02	-0.0701299	0.36	Depth	0.474663
COAD	FOXJ3	2067	AP	M5457_1.02	-0.0756303	0.27	Depth	0.463037
COAD	FOXJ3	2067	AP	M5458_1.02	-0.0747135	0.31	Depth	0.468376
COAD	FOXJ3	2067	AP	M6242_1.02	0.00748663	0.4	Depth	0.48512
COAD	FOXJ3	2067	AP	M6243_1.02	0.0594347	0.33	Depth	0.468733
COAD	ARNT	7513	ES	M2957_1.02	-0.0187215	0.41	Depth	0.486495
COAD	ARNT	7513	ES	M6151_1.02	-0.0465575	0.38	Depth	0.480523
COAD	CREB3L4	7768	AP	M5323_1.02	-0.257397	0.1	Depth	0.410039
COAD	CREB3L4	7769	AP	M5323_1.02	0.257397	0.13	Depth	0.430329
COAD	ZBTB7B	7876	AP	M5961_1.02	0.147727	0.26	Depth	0.463037
COAD	ZBTB7B	7876	AP	M6539_1.02	0.0337243	0.46	Depth	0.496757
COAD	ZBTB7B	7877	AP	M5961_1.02	-0.422654	0	Depth	0
COAD	ZBTB7B	7877	AP	M6539_1.02	-0.309018	0.04	Depth	0.339193
COAD	ZBTB7B	7878	ES	M5961_1.02	0.0460881	0.44	Depth	0.491324
COAD	ZBTB7B	7878	ES	M6539_1.02	0.0211529	0.41	Depth	0.486495
COAD	ZBTB7B	7879	ES	M5961_1.02	-0.261774	0.1	Depth	0.410039
COAD	ZBTB7B	7879	ES	M6539_1.02	-0.144495	0.21	Depth	0.456646
COAD	ELF3	9394	RI	M5376_1.02	-0.0046332	0.46	Depth	0.496757
COAD	ELF3	9394	RI	M6205_1.02	-0.0738739	0.44	Depth	0.491324
COAD	ELK4	9560	AT	M1903_1.02	-0.112491	0.3	Depth	0.467189
COAD	ELK4	9561	AT	M1903_1.02	0.112491	0.33	Depth	0.468733
COAD	CREM	11231	AP	M6181_1.02	0.242115	0.13	Depth	0.430329
COAD	ARID5B	11865	AP	M3574_1.02	-0.407115	0.03	Depth	0.320116
COAD	ARID5B	11865	AP	M6149_1.02	-0.241107	0.16	Depth	0.44356
COAD	ARID5B	11866	AP	M3574_1.02	0.407115	0.01	Depth	0.203094
COAD	ARID5B	11866	AP	M6149_1.02	0.241107	0.18	Depth	0.449969
COAD	MXI1	13079	AP	M4543_1.02	-0.213918	0.07	Depth	0.390174
COAD	MXI1	13079	AP	M4678_1.02	-0.334282	0.02	Depth	0.275872
COAD	MXI1	13079	AP	M4679_1.02	0.0279024	0.36	Depth	0.474663
COAD	MXI1	13080	AP	M4543_1.02	0.190721	0.11	Depth	0.417512
COAD	MXI1	13080	AP	M4678_1.02	0.305613	0.02	Depth	0.275872
COAD	MXI1	13080	AP	M4679_1.02	0.0349054	0.39	Depth	0.483684
COAD	TCF7L2	13141	ES	M6512_1.02	-0.00919641	0.52	Depth	0.527461
COAD	TCF7L2	13142	ES	M6512_1.02	0.154887	0.3	Depth	0.467189
COAD	TCF7L2	13143	ES	M6512_1.02	-0.21214	0.24	Depth	0.4595
COAD	TCF7L2	13150	AD	M6512_1.02	-0.260684	0.08	Depth	0.398482
COAD	TCF7L2	13154	ES	M6512_1.02	-0.0900655	0.33	Depth	0.468733
COAD	TCF7L2	13156	ES	M6512_1.02	-0.16966	0.17	Depth	0.44765
COAD	ZNF143	14317	AP	M3964_1.02	-0.22188	0.09	Depth	0.405939
COAD	ZNF143	14317	AP	M3965_1.02	-0.19453	0.11	Depth	0.417512
COAD	ZNF143	14317	AP	M4484_1.02	-0.295726	0.06	Depth	0.374783
COAD	ZNF143	14318	AP	M3964_1.02	0.22188	0.11	Depth	0.417512
COAD	ZNF143	14318	AP	M3965_1.02	0.19453	0.17	Depth	0.44765
COAD	ZNF143	14318	AP	M4484_1.02	0.295726	0.06	Depth	0.374783
COAD	NR1H3	15692	AP	M6383_1.02	0.258382	0.09	Depth	0.405939
COAD	NR1H3	15694	AP	M6383_1.02	-0.223349	0.14	Depth	0.43632
COAD	NR1H3	15699	RI	M6383_1.02	0.0432695	0.44	Depth	0.491324
COAD	NR1H3	15704	RI	M6383_1.02	0.0909588	0.31	Depth	0.468376
COAD	NR1H3	15705	RI	M6383_1.02	-0.0422191	0.27	Depth	0.463037
COAD	SPI1	15728	AT	M6484_1.02	-0.144366	0.23	Depth	0.456646
COAD	SPI1	15728	AT	M5863_1.02	-0.155311	0.15	Depth	0.438663
COAD	SPI1	15729	AT	M6484_1.02	0.144366	0.2	Depth	0.455938
COAD	SPI1	15729	AT	M5863_1.02	0.155311	0.16	Depth	0.44356
COAD	ESRRA	16630	AP	M5404_1.02	-0.0368749	0.36	Depth	0.474663
COAD	ESRRA	16630	AP	M4663_1.02	0.346975	0.03	Depth	0.320116
COAD	ESRRA	16630	AP	M5405_1.02	-0.207134	0.11	Depth	0.417512
COAD	ESRRA	16630	AP	M5409_1.02	-0.111281	0.24	Depth	0.4595
COAD	ESRRA	16631	AP	M5404_1.02	0.0368749	0.45	Depth	0.494677
COAD	ESRRA	16631	AP	M4663_1.02	-0.346975	0.01	Depth	0.203094
COAD	ESRRA	16631	AP	M5405_1.02	0.207134	0.12	Depth	0.425792
COAD	ESRRA	16631	AP	M5409_1.02	0.111281	0.26	Depth	0.463037
COAD	ETS1	19408	AP	M5418_1.02	-0.0180823	0.4	Depth	0.48512
COAD	ETS1	19408	AP	M4461_1.02	0.0209077	0.46	Depth	0.496757
COAD	ETS1	19408	AP	M5419_1.02	0.127	0.21	Depth	0.456646
COAD	ETS1	19409	AP	M5418_1.02	0.0180823	0.53	Depth	0.535242
COAD	ETS1	19409	AP	M4461_1.02	-0.0209077	0.41	Depth	0.486495
COAD	ETS1	19409	AP	M5419_1.02	-0.127	0.17	Depth	0.44765
COAD	ZNF384	19921	AP	M6557_1.02	0.0628334	0.42	Depth	0.487425
COAD	ZNF384	19922	AP	M6557_1.02	-0.0628334	0.27	Depth	0.463037
COAD	ZNF384	19923	ES	M6557_1.02	0.0891782	0.33	Depth	0.468733
COAD	ARNTL2	20882	ES	M0220_1.02	-0.0943909	0.32	Depth	0.46856
COAD	VDR	21383	ES	M5946_1.02	-0.107294	0.34	Depth	0.472261
COAD	VDR	21383	ES	M6532_1.02	0.0607637	0.33	Depth	0.468733
COAD	VDR	21383	ES	M6533_1.02	-0.258382	0.1	Depth	0.410039
COAD	VDR	21385	ES	M5946_1.02	0.137728	0.19	Depth	0.452944
COAD	VDR	21385	ES	M6532_1.02	0.0757364	0.31	Depth	0.468376
COAD	VDR	21385	ES	M6533_1.02	-0.051613	0.4	Depth	0.48512
COAD	NR2C1	23741	AT	M6389_1.02	0.0957435	0.35	Depth	0.474663
COAD	NR2C1	23742	AT	M6389_1.02	-0.0957435	0.32	Depth	0.46856
COAD	TBX3	24654	ES	M6504_1.02	-0.036777	0.47	Depth	0.501079
COAD	KDM2B	24879	RI	M0607_1.02	0.0668427	0.27	Depth	0.463037
COAD	ZNF219	26526	AP	M6553_1.02	-0.04	0.4	Depth	0.48512
COAD	ZNF219	26528	AP	M6553_1.02	-0.00410327	0.52	Depth	0.527461
COAD	NFATC4	26982	AP	M6365_1.02	0.127791	0.27	Depth	0.463037
COAD	NFATC4	26983	AP	M6365_1.02	-0.143846	0.21	Depth	0.456646
COAD	ESR2	27867	AT	M2065_1.02	0.283272	0.1	Depth	0.410039
COAD	ESR2	27867	AT	M6219_1.02	-0.105006	0.35	Depth	0.474663
COAD	ESR2	27868	AT	M2065_1.02	0.183178	0.22	Depth	0.456646
COAD	ESR2	27868	AT	M6219_1.02	0.541902	0	Depth	0
COAD	MAX	27935	RI	M4646_1.02	0.223615	0.06	Depth	0.374783
COAD	MAX	27935	RI	M1889_1.02	0.0395526	0.37	Depth	0.4769
COAD	MAX	27935	RI	M5613_1.02	0.186922	0.11	Depth	0.417512
COAD	ZNF410	28319	AP	M5972_1.02	-0.418667	0.01	Depth	0.203094
COAD	ZNF410	28328	ES	M5972_1.02	-0.244733	0.05	Depth	0.363241
COAD	MEIS2	29905	AP	M5619_1.02	-0.182527	0.22	Depth	0.456646
COAD	MEIS2	29905	AP	M5620_1.02	-0.100032	0.34	Depth	0.472261
COAD	MEIS2	29907	AP	M5619_1.02	0.16008	0.2	Depth	0.455938
COAD	MEIS2	29907	AP	M5620_1.02	0.0542421	0.38	Depth	0.480523
COAD	TCF12	30783	AP	M4479_1.02	-0.0916929	0.28	Depth	0.464162
COAD	TCF12	30784	AP	M4479_1.02	0.0960228	0.25	Depth	0.462506
COAD	TCF12	30789	ES	M4479_1.02	-0.290752	0.06	Depth	0.374783
COAD	NR2F2	32593	AP	M4702_1.02	-0.193577	0.14	Depth	0.43632
COAD	NR2F2	32593	AP	M2960_1.02	0.0270285	0.49	Depth	0.51005
COAD	NR2F2	32593	AP	M4703_1.02	-0.232204	0.14	Depth	0.43632
COAD	NR2F2	32593	AP	M6179_1.02	-0.195656	0.07	Depth	0.390174
COAD	NR2F2	32594	AP	M4702_1.02	-0.056639	0.37	Depth	0.4769
COAD	NR2F2	32594	AP	M2960_1.02	-0.219216	0.07	Depth	0.390174
COAD	NR2F2	32594	AP	M4703_1.02	0.126096	0.28	Depth	0.464162
COAD	NR2F2	32594	AP	M6179_1.02	0.00591587	0.5	Depth	0.515062
COAD	MEF2A	32719	ES	M6340_1.02	0.0396893	0.44	Depth	0.491324
COAD	MEF2A	32719	ES	M3550_1.02	0.00661489	0.5	Depth	0.515062
COAD	MEF2A	32719	ES	M3553_1.02	-0.0185217	0.45	Depth	0.494677
COAD	MEF2A	32719	ES	M4695_1.02	0.0449813	0.42	Depth	0.487425
COAD	NFATC3	37186	ES	M1517_1.02	0.1566	0.21	Depth	0.456646
COAD	HIC1	38378	AP	M6274_1.02	-0.338294	0.1	Depth	0.410039
COAD	HIC1	38379	AP	M6274_1.02	0.338294	0.12	Depth	0.425792
COAD	ZNF232	38656	RI	M5967_1.02	0.201749	0.18	Depth	0.449969
COAD	SREBF1	39507	ES	M2387_1.02	0.172119	0.19	Depth	0.452944
COAD	SREBF1	39507	ES	M3944_1.02	0.00755006	0.47	Depth	0.501079
COAD	RARA	40856	AP	M5763_1.02	0.144772	0.19	Depth	0.452944
COAD	RARA	40856	AP	M5762_1.02	0.238332	0.06	Depth	0.374783
COAD	RARA	40856	AP	M5761_1.02	0.110521	0.13	Depth	0.430329
COAD	RARA	40856	AP	M6443_1.02	-0.0392843	0.39	Depth	0.483684
COAD	RARA	40857	AP	M5763_1.02	0.117847	0.18	Depth	0.449969
COAD	RARA	40857	AP	M5762_1.02	-0.0876464	0.32	Depth	0.46856
COAD	RARA	40857	AP	M5761_1.02	0.0454098	0.43	Depth	0.489072
COAD	RARA	40857	AP	M6443_1.02	0.0760477	0.36	Depth	0.474663
COAD	RARA	40858	AP	M5763_1.02	-0.159645	0.2	Depth	0.455938
COAD	RARA	40858	AP	M5762_1.02	-0.114345	0.27	Depth	0.463037
COAD	RARA	40858	AP	M5761_1.02	-0.0233067	0.35	Depth	0.474663
COAD	RARA	40858	AP	M6443_1.02	0.00645585	0.48	Depth	0.505364
COAD	NFE2L1	42157	AP	M4030_1.02	-0.0936463	0.29	Depth	0.466743
COAD	NFE2L1	42158	AP	M4030_1.02	0.097801	0.23	Depth	0.456646
COAD	NFE2L1	42160	ES	M4030_1.02	-0.0718897	0.27	Depth	0.463037
COAD	HOXB6	42211	AA	M6296_1.02	0.159077	0.22	Depth	0.456646
COAD	TGIF1	44503	AP	M4064_1.02	-0.11522	0.22	Depth	0.456646
COAD	TGIF1	44503	AP	M5933_1.02	-0.127913	0.17	Depth	0.44765
COAD	TGIF1	44503	AP	M6519_1.02	-0.248933	0.1	Depth	0.410039
COAD	TGIF1	44503	AP	M6520_1.02	-0.0953058	0.31	Depth	0.468376
COAD	TGIF1	44507	AD	M4064_1.02	0.165382	0.23	Depth	0.456646
COAD	TGIF1	44507	AD	M5933_1.02	-0.0187807	0.49	Depth	0.51005
COAD	TGIF1	44507	AD	M6519_1.02	0.0207428	0.41	Depth	0.486495
COAD	TGIF1	44507	AD	M6520_1.02	0.101051	0.27	Depth	0.463037
COAD	GATA6	44782	AP	M3334_1.02	-0.284152	0.01	Depth	0.203094
COAD	GATA6	44783	AP	M3334_1.02	0.284152	0.05	Depth	0.363241
COAD	NFATC1	46239	AT	M5656_1.02	0.059521	0.37	Depth	0.4769
COAD	NFATC1	46239	AT	M5657_1.02	-0.0184966	0.45	Depth	0.494677
COAD	NFATC1	46239	AT	M5658_1.02	0.0379417	0.5	Depth	0.515062
COAD	NFATC1	46239	AT	M6361_1.02	0.129002	0.24	Depth	0.4595
COAD	NFATC1	46239	AT	M6362_1.02	0.131847	0.27	Depth	0.463037
COAD	NFATC1	46240	AT	M5656_1.02	-0.059521	0.32	Depth	0.46856
COAD	NFATC1	46240	AT	M5657_1.02	0.0184966	0.49	Depth	0.51005
COAD	NFATC1	46240	AT	M5658_1.02	-0.0379417	0.36	Depth	0.474663
COAD	NFATC1	46240	AT	M6361_1.02	-0.129002	0.26	Depth	0.463037
COAD	NFATC1	46240	AT	M6362_1.02	-0.131847	0.24	Depth	0.4595
COAD	NFIX	47900	AP	M5664_1.02	-0.12525	0.25	Depth	0.462506
COAD	NFIX	47900	AP	M5666_1.02	0.295662	0.11	Depth	0.417512
COAD	NFIX	47903	AP	M5664_1.02	0.174638	0.18	Depth	0.449969
COAD	NFIX	47903	AP	M5666_1.02	-0.16396	0.15	Depth	0.438663
COAD	NFIX	47907	ES	M5664_1.02	0.0945916	0.32	Depth	0.46856
COAD	NFIX	47907	ES	M5666_1.02	0.0326254	0.42	Depth	0.487425
COAD	ZNF333	48018	AT	M6555_1.02	-0.00579932	0.56	Depth	0.561681
COAD	ZNF333	48020	AT	M6555_1.02	0.0246198	0.39	Depth	0.483684
COAD	ZNF333	48022	ES	M6555_1.02	0.0844979	0.34	Depth	0.472261
COAD	MEF2B	48590	AP	M5616_1.02	0.664066	0	Depth	0
COAD	MEF2B	48591	AP	M5616_1.02	-0.664066	0	Depth	0
COAD	USF2	49098	ES	M4579_1.02	0.227487	0.08	Depth	0.398482
COAD	MEIS3	50642	AT	M5621_1.02	-0.0559507	0.42	Depth	0.487425
COAD	MEIS3	50642	AT	M5622_1.02	0.0900901	0.36	Depth	0.474663
COAD	MEIS3	50643	AT	M5621_1.02	0.0559507	0.36	Depth	0.474663
COAD	MEIS3	50643	AT	M5622_1.02	-0.0900901	0.3	Depth	0.467189
COAD	MEIS3	50645	AA	M5621_1.02	-0.209853	0.13	Depth	0.430329
COAD	MEIS3	50645	AA	M5622_1.02	-0.00451298	0.35	Depth	0.474663
COAD	IRF3	50994	ES	M5572_1.02	-0.0301453	0.45	Depth	0.494677
COAD	IRF3	50994	ES	M6309_1.02	-0.010711	0.45	Depth	0.494677
COAD	IRF3	50995	ES	M5572_1.02	0.0252868	0.48	Depth	0.505364
COAD	IRF3	50995	ES	M6309_1.02	0.0396417	0.36	Depth	0.474663
COAD	IRF3	51011	ES	M5572_1.02	-0.0648093	0.44	Depth	0.491324
COAD	IRF3	51011	ES	M6309_1.02	-0.112829	0.26	Depth	0.463037
COAD	IRF3	51026	ES	M5572_1.02	-0.0886716	0.37	Depth	0.4769
COAD	IRF3	51026	ES	M6309_1.02	-0.0137594	0.49	Depth	0.51005
COAD	IRF3	51030	RI	M5572_1.02	-0.0177419	0.44	Depth	0.491324
COAD	IRF3	51030	RI	M6309_1.02	-0.0685484	0.43	Depth	0.489072
COAD	IRF3	51032	AA	M5572_1.02	0.290093	0.06	Depth	0.374783
COAD	IRF3	51032	AA	M6309_1.02	0.399015	0.03	Depth	0.320116
COAD	ATF5	51133	AP	M6154_1.02	0.0280566	0.48	Depth	0.505364
COAD	ATF5	51134	AP	M6154_1.02	-0.0280566	0.38	Depth	0.480523
COAD	MZF1	52484	AP	M3594_1.02	-0.200403	0.12	Depth	0.425792
COAD	MZF1	52484	AP	M1888_1.02	-0.115726	0.28	Depth	0.464162
COAD	MZF1	52485	AP	M3594_1.02	0.200403	0.14	Depth	0.43632
COAD	MZF1	52485	AP	M1888_1.02	0.115726	0.13	Depth	0.430329
COAD	MEIS1	53812	RI	M3562_1.02	0.272049	0.18	Depth	0.449969
COAD	MEIS1	53812	RI	M6343_1.02	0.241334	0.11	Depth	0.417512
COAD	LBX2	54098	AP	M5594_1.02	0.00284546	0.53	Depth	0.535242
COAD	LBX2	54098	AP	M5595_1.02	-0.0732705	0.28	Depth	0.464162
COAD	LBX2	54099	AP	M5594_1.02	-0.00284546	0.39	Depth	0.483684
COAD	LBX2	54099	AP	M5595_1.02	0.0732705	0.35	Depth	0.474663
COAD	ARID5A	54532	ES	M0108_1.02	-0.290237	0.04	Depth	0.339193
COAD	NPAS2	54725	AP	M0196_1.02	-0.434447	0	Depth	0
COAD	NPAS2	54726	AP	M0196_1.02	0.434447	0.04	Depth	0.339193
COAD	STAT1	56594	AT	M6493_1.02	0.0670752	0.33	Depth	0.468733
COAD	STAT1	56594	AT	M3966_1.02	0.123536	0.18	Depth	0.449969
COAD	STAT1	56594	AT	M3968_1.02	-0.201882	0.15	Depth	0.438663
COAD	STAT1	56594	AT	M4707_1.02	0.313492	0.04	Depth	0.339193
COAD	STAT1	56595	AT	M6493_1.02	-0.0670752	0.29	Depth	0.466743
COAD	STAT1	56595	AT	M3966_1.02	-0.123536	0.16	Depth	0.44356
COAD	STAT1	56595	AT	M3968_1.02	0.201882	0.19	Depth	0.452944
COAD	STAT1	56595	AT	M4707_1.02	-0.313492	0.01	Depth	0.203094
COAD	HNF4A	59461	AP	M6283_1.02	-0.359886	0	Depth	0
COAD	HNF4A	59461	AP	M5524_1.02	-0.278039	0.04	Depth	0.339193
COAD	HNF4A	59461	AP	M5527_1.02	-0.289638	0.07	Depth	0.390174
COAD	HNF4A	59461	AP	M5525_1.02	-0.417442	0	Depth	0
COAD	HNF4A	59461	AP	M4699_1.02	-0.129664	0.2	Depth	0.455938
COAD	HNF4A	59461	AP	M5529_1.02	-0.311522	0.04	Depth	0.339193
COAD	HNF4A	59462	AP	M6283_1.02	0.359886	0.02	Depth	0.275872
COAD	HNF4A	59462	AP	M5524_1.02	0.278039	0.02	Depth	0.275872
COAD	HNF4A	59462	AP	M5527_1.02	0.289638	0.04	Depth	0.339193
COAD	HNF4A	59462	AP	M5525_1.02	0.417442	0.01	Depth	0.203094
COAD	HNF4A	59462	AP	M4699_1.02	0.129664	0.3	Depth	0.467189
COAD	HNF4A	59462	AP	M5529_1.02	0.311522	0.02	Depth	0.275872
COAD	HNF4A	59465	AD	M6283_1.02	-0.266659	0.09	Depth	0.405939
COAD	HNF4A	59465	AD	M5524_1.02	-0.0620418	0.34	Depth	0.472261
COAD	HNF4A	59465	AD	M5527_1.02	-0.194441	0.12	Depth	0.425792
COAD	HNF4A	59465	AD	M5525_1.02	-0.150235	0.19	Depth	0.452944
COAD	HNF4A	59465	AD	M4699_1.02	-0.0248386	0.46	Depth	0.496757
COAD	HNF4A	59465	AD	M5529_1.02	-0.164679	0.18	Depth	0.449969
COAD	HNF4A	59466	ES	M6283_1.02	-0.321658	0.04	Depth	0.339193
COAD	HNF4A	59466	ES	M5524_1.02	-0.162712	0.23	Depth	0.456646
COAD	HNF4A	59466	ES	M5527_1.02	-0.155179	0.21	Depth	0.456646
COAD	HNF4A	59466	ES	M5525_1.02	-0.240302	0.15	Depth	0.438663
COAD	HNF4A	59466	ES	M4699_1.02	-0.219963	0.13	Depth	0.430329
COAD	HNF4A	59466	ES	M5529_1.02	-0.0994352	0.3	Depth	0.467189
COAD	TCFL5	60086	AT	M0212_1.02	0.00798774	0.54	Depth	0.54288
COAD	TCFL5	60087	AT	M0212_1.02	-0.00798774	0.54	Depth	0.54288
COAD	SIM2	60533	AT	M5234_1.02	0.268571	0.06	Depth	0.374783
COAD	SIM2	60533	AT	M5234_1.02	0.268571	0.03	Depth	0.320116
COAD	SIM2	60534	AT	M5234_1.02	-0.268571	0.11	Depth	0.417512
COAD	SIM2	60534	AT	M5234_1.02	-0.268571	0.03	Depth	0.320116
COAD	TBX1	61080	AT	M5875_1.02	-0.38956	0.04	Depth	0.339193
COAD	TBX1	61080	AT	M5876_1.02	-0.413122	0.02	Depth	0.275872
COAD	TBX1	61080	AT	M5877_1.02	-0.460246	0.01	Depth	0.203094
COAD	TBX1	61080	AT	M5878_1.02	-0.249758	0.15	Depth	0.438663
COAD	TBX1	61080	AT	M5879_1.02	-0.480666	0.05	Depth	0.363241
COAD	PATZ1	61847	ES	M3546_1.02	0.170308	0.13	Depth	0.430329
COAD	TEF	62421	AP	M5910_1.02	-0.184882	0.1	Depth	0.410039
COAD	TEF	62421	AP	M6510_1.02	-0.256847	0.09	Depth	0.405939
COAD	TEF	62422	AP	M5910_1.02	0.184882	0.17	Depth	0.44765
COAD	TEF	62422	AP	M6510_1.02	0.256847	0.1	Depth	0.410039
COAD	PPARG	63414	AP	M1894_1.02	0.300853	0.02	Depth	0.275872
COAD	PPARG	63414	AP	M3783_1.02	0.304884	0.04	Depth	0.339193
COAD	PPARG	63414	AP	M3785_1.02	-0.0123281	0.44	Depth	0.491324
COAD	PPARG	63414	AP	M6433_1.02	0.194879	0.14	Depth	0.43632
COAD	PPARG	63414	AP	M6434_1.02	0.0384068	0.42	Depth	0.487425
COAD	PPARG	63415	AP	M1894_1.02	-0.378615	0.03	Depth	0.320116
COAD	PPARG	63415	AP	M3783_1.02	-0.286392	0.07	Depth	0.390174
COAD	PPARG	63415	AP	M3785_1.02	0.0870081	0.29	Depth	0.466743
COAD	PPARG	63415	AP	M6433_1.02	-0.177098	0.16	Depth	0.44356
COAD	PPARG	63415	AP	M6434_1.02	-0.00806069	0.44	Depth	0.491324
COAD	FOXP1	65599	AP	M0717_1.02	-0.112692	0.34	Depth	0.472261
COAD	FOXP1	65599	AP	M2283_1.02	-0.0118257	0.46	Depth	0.496757
COAD	TFDP2	67090	AA	M6515_1.02	0.249332	0.1	Depth	0.410039
COAD	TFDP2	67101	ES	M6515_1.02	0.118646	0.3	Depth	0.467189
COAD	MECOM	67567	AP	M3227_1.02	-0.0711144	0.35	Depth	0.474663
COAD	MECOM	67567	AP	M3225_1.02	-0.0667155	0.33	Depth	0.468733
COAD	MECOM	67567	AP	M3228_1.02	-0.00989736	0.46	Depth	0.496757
COAD	MECOM	67567	AP	M3230_1.02	-0.13893	0.28	Depth	0.464162
COAD	MECOM	67572	ES	M3227_1.02	-0.0596641	0.49	Depth	0.51005
COAD	MECOM	67572	ES	M3225_1.02	-0.0663491	0.42	Depth	0.487425
COAD	MECOM	67572	ES	M3228_1.02	0.163282	0.11	Depth	0.417512
COAD	MECOM	67572	ES	M3230_1.02	-0.0180496	0.44	Depth	0.491324
COAD	KLF3	69020	AT	M6323_1.02	-0.153518	0.19	Depth	0.452944
COAD	KLF3	69021	AT	M6323_1.02	0.153518	0.2	Depth	0.455938
COAD	LEF1	70286	AP	M5596_1.02	-0.035014	0.38	Depth	0.480523
COAD	LEF1	70286	AP	M6327_1.02	-0.016593	0.42	Depth	0.487425
COAD	LEF1	70287	AP	M5596_1.02	0.035014	0.45	Depth	0.494677
COAD	LEF1	70287	AP	M6327_1.02	0.016593	0.36	Depth	0.474663
COAD	LEF1	70294	ES	M5596_1.02	0.0808549	0.39	Depth	0.483684
COAD	LEF1	70294	ES	M6327_1.02	-0.0683537	0.36	Depth	0.474663
COAD	ELF2	70608	AP	M6204_1.02	0.169369	0.18	Depth	0.449969
COAD	ELF2	70610	AP	M6204_1.02	-0.169369	0.1	Depth	0.410039
COAD	ELF2	70614	AA	M6204_1.02	-0.463061	0	Depth	0
COAD	MEF2C	72747	AP	M2297_1.02	0.00592885	0.51	Depth	0.521273
COAD	MEF2C	72749	AP	M2297_1.02	-0.00592885	0.53	Depth	0.535242
COAD	TCF7	73350	ES	M6506_1.02	-0.135381	0.13	Depth	0.430329
COAD	SMAD5	73475	ES	M2329_1.02	-0.144038	0.25	Depth	0.462506
COAD	SMAD5	73475	ES	M5099_1.02	-0.164509	0.16	Depth	0.44356
COAD	SMAD5	73475	ES	M6463_1.02	-0.00024664	0.36	Depth	0.474663
COAD	HMGA1	75775	ES	M6279_1.02	-0.18897	0.14	Depth	0.43632
COAD	ZNF76	75900	RI	M1915_1.02	0.00557235	0.54	Depth	0.54288
COAD	ZNF76	75901	AA	M1915_1.02	0.1261	0.21	Depth	0.456646
COAD	PPARD	75913	ES	M6432_1.02	0.0547049	0.38	Depth	0.480523
COAD	NFYA	76094	ES	M1890_1.02	-0.0911474	0.28	Depth	0.464162
COAD	NFYA	76094	ES	M3628_1.02	0.00947772	0.48	Depth	0.505364
COAD	FOXP4	76112	AA	M0717_1.02	-0.326184	0.01	Depth	0.203094
COAD	PRDM1	77110	AP	M2307_1.02	-0.300152	0.09	Depth	0.405939
COAD	PRDM1	77110	AP	M4686_1.02	-0.265461	0.13	Depth	0.430329
COAD	PRDM1	77110	AP	M4687_1.02	-0.179488	0.17	Depth	0.44765
COAD	PRDM1	77111	AP	M2307_1.02	0.300152	0.1	Depth	0.410039
COAD	PRDM1	77111	AP	M4686_1.02	0.265461	0.09	Depth	0.405939
COAD	PRDM1	77111	AP	M4687_1.02	0.179488	0.23	Depth	0.456646
COAD	HSF2	77374	ES	M5566_1.02	-0.261374	0.09	Depth	0.405939
COAD	HSF2	77374	ES	M3444_1.02	-0.249466	0.14	Depth	0.43632
COAD	MYB	77817	ES	M3585_1.02	-0.00079614	0.54	Depth	0.54288
COAD	MYB	77817	ES	M3068_1.02	0.0334379	0.49	Depth	0.51005
COAD	MYB	77818	ES	M3585_1.02	-0.305302	0.02	Depth	0.275872
COAD	MYB	77818	ES	M3068_1.02	0.200033	0.09	Depth	0.405939
COAD	PLAGL1	78001	RI	M6422_1.02	-0.133481	0.24	Depth	0.4595
COAD	FOXK1	78641	AP	M0718_1.02	-0.202254	0.15	Depth	0.438663
COAD	FOXK1	78641	AP	M5459_1.02	0.071422	0.33	Depth	0.468733
COAD	FOXK1	78642	AP	M0718_1.02	0.202254	0.12	Depth	0.425792
COAD	FOXK1	78642	AP	M5459_1.02	-0.071422	0.29	Depth	0.466743
COAD	ETV1	78827	AP	M5420_1.02	0.322296	0.14	Depth	0.43632
COAD	ETV1	78832	AP	M5420_1.02	-0.119918	0.26	Depth	0.463037
COAD	MNX1	82500	AP	M5635_1.02	-0.218733	0.06	Depth	0.374783
COAD	MNX1	82501	AP	M5635_1.02	0.218733	0.08	Depth	0.398482
COAD	MNX1	82504	AD	M5635_1.02	-0.314919	0.05	Depth	0.363241
COAD	SOX7	82607	AP	M5835_1.02	0.174859	0.22	Depth	0.456646
COAD	SOX7	82607	AP	M5836_1.02	0.100044	0.27	Depth	0.463037
COAD	SOX7	82607	AP	M5837_1.02	0.168769	0.27	Depth	0.463037
COAD	SOX7	82608	AP	M5835_1.02	-0.174859	0.23	Depth	0.456646
COAD	SOX7	82608	AP	M5836_1.02	-0.100044	0.25	Depth	0.462506
COAD	SOX7	82608	AP	M5837_1.02	-0.168769	0.21	Depth	0.456646
COAD	E2F5	84324	AP	M6194_1.02	0.183662	0.1	Depth	0.410039
COAD	E2F5	84325	AP	M6194_1.02	-0.183662	0.15	Depth	0.438663
COAD	OSR2	84665	ES	M0396_1.02	-0.398214	0.09	Depth	0.405939
COAD	PBX3	87590	ES	M4473_1.02	0.0292457	0.34	Depth	0.472261
COAD	CREM	91509	ES	M6181_1.02	-0.236364	0.2	Depth	0.455938
COAD	HOXB9	94582	AD	M1157_1.02	-0.0519851	0.35	Depth	0.474663
COAD	ZBTB7B	101301	ES	M5961_1.02	0.357895	0.06	Depth	0.374783
COAD	ZBTB7B	101301	ES	M6539_1.02	0.0508772	0.41	Depth	0.486495
COAD	ZBTB7B	101302	ES	M5961_1.02	-0.00701754	0.46	Depth	0.496757
COAD	ZBTB7B	101302	ES	M6539_1.02	0.0929825	0.28	Depth	0.464162
COAD	ZBTB7B	101303	ES	M5961_1.02	-0.0917293	0.37	Depth	0.4769
COAD	ZBTB7B	101303	ES	M6539_1.02	-0.0827068	0.33	Depth	0.468733
COAD	ZBTB7B	115179	ES	M5961_1.02	0.349451	0.12	Depth	0.425792
COAD	ZBTB7B	115179	ES	M6539_1.02	0.221978	0.23	Depth	0.456646
KIRC	HES4	4	AD	M0191_1.02	0.0426785	0.5	Depth	0.515062
KIRC	HES4	5	ES	M0191_1.02	-0.0191317	0.47	Depth	0.501079
KIRC	GMEB1	1390	AA	M1545_1.02	-0.333333	0.18	Depth	0.449969
KIRC	NFYC	2013	AP	M6373_1.02	-0.461765	0.05	Depth	0.363241
KIRC	NFYC	2015	AP	M6373_1.02	0.514706	0	Depth	0
KIRC	FOXJ3	2065	AP	M5456_1.02	-0.288235	0.1	Depth	0.410039
KIRC	FOXJ3	2065	AP	M5457_1.02	-0.376471	0.08	Depth	0.398482
KIRC	FOXJ3	2065	AP	M5458_1.02	-0.388235	0.08	Depth	0.398482
KIRC	FOXJ3	2065	AP	M6242_1.02	-0.438235	0.04	Depth	0.339193
KIRC	FOXJ3	2065	AP	M6243_1.02	-0.544118	0.02	Depth	0.275872
KIRC	FOXJ3	2067	AP	M5456_1.02	0.217647	0.27	Depth	0.463037
KIRC	FOXJ3	2067	AP	M5457_1.02	0	0.52	Depth	0.527461
KIRC	FOXJ3	2067	AP	M5458_1.02	0.0147059	0.52	Depth	0.527461
KIRC	FOXJ3	2067	AP	M6242_1.02	-0.244118	0.14	Depth	0.43632
KIRC	FOXJ3	2067	AP	M6243_1.02	-0.279412	0.13	Depth	0.430329
KIRC	FOXJ3	2069	ES	M5456_1.02	-0.375	0.12	Depth	0.425792
KIRC	FOXJ3	2069	ES	M5457_1.02	-0.346429	0.07	Depth	0.390174
KIRC	FOXJ3	2069	ES	M5458_1.02	-0.282143	0.17	Depth	0.44765
KIRC	FOXJ3	2069	ES	M6242_1.02	-0.221429	0.26	Depth	0.463037
KIRC	FOXJ3	2069	ES	M6243_1.02	-0.0821429	0.47	Depth	0.501079
KIRC	NFIA	3222	AP	M5660_1.02	-0.416483	0.06	Depth	0.374783
KIRC	NFIA	3222	AP	M5661_1.02	-0.264901	0.17	Depth	0.44765
KIRC	NFIA	3224	AP	M5660_1.02	0.279412	0.12	Depth	0.425792
KIRC	NFIA	3224	AP	M5661_1.02	0.155882	0.27	Depth	0.463037
KIRC	RFX5	7609	ES	M4510_1.02	0	0.41	Depth	0.486495
KIRC	RFX5	7609	ES	M5780_1.02	0.0176471	0.41	Depth	0.486495
KIRC	ZBTB7B	7878	ES	M5961_1.02	0.111765	0.4	Depth	0.48512
KIRC	ZBTB7B	7878	ES	M6539_1.02	0.132353	0.32	Depth	0.46856
KIRC	NR1I3	8622	AT	M6387_1.02	-0.144543	0.21	Depth	0.456646
KIRC	NR1I3	8622	AT	M6388_1.02	-0.250739	0.17	Depth	0.44765
KIRC	NR1I3	8624	AT	M6387_1.02	0.144543	0.21	Depth	0.456646
KIRC	NR1I3	8624	AT	M6388_1.02	0.250739	0.16	Depth	0.44356
KIRC	PBX1	8790	ES	M1898_1.02	0.160714	0.29	Depth	0.466743
KIRC	ATF3	9736	RI	M4552_1.02	0.46962	0.02	Depth	0.275872
KIRC	ATF3	9736	RI	M4684_1.02	0.447521	0.05	Depth	0.363241
KIRC	ATF3	9736	RI	M6153_1.02	0.270722	0.16	Depth	0.44356
KIRC	HLX	9879	RI	M1018_1.02	0.526471	0.04	Depth	0.339193
KIRC	CREM	11231	AP	M6181_1.02	0.261765	0.15	Depth	0.438663
KIRC	CREM	11237	AT	M6181_1.02	-0.323529	0.08	Depth	0.398482
KIRC	CREM	11238	AT	M6181_1.02	0.305882	0.11	Depth	0.417512
KIRC	CREM	11240	ES	M6181_1.02	-0.00549451	0.53	Depth	0.535242
KIRC	CREM	11242	ES	M6181_1.02	-0.043011	0.43	Depth	0.489072
KIRC	CREM	11243	ES	M6181_1.02	0.114388	0.3	Depth	0.467189
KIRC	CREM	11245	ES	M6181_1.02	-0.0454545	0.41	Depth	0.486495
KIRC	CREM	11251	ES	M6181_1.02	-0.164706	0.29	Depth	0.466743
KIRC	CREM	11258	ES	M6181_1.02	-0.0420316	0.38	Depth	0.480523
KIRC	CREM	11261	ES	M6181_1.02	-0.111765	0.4	Depth	0.48512
KIRC	CREM	11264	ES	M6181_1.02	-0.15	0.32	Depth	0.46856
KIRC	CREM	11285	ES	M6181_1.02	0.318527	0.09	Depth	0.405939
KIRC	CREM	11290	ES	M6181_1.02	-0.0668696	0.47	Depth	0.501079
KIRC	CREM	11291	ES	M6181_1.02	0.300749	0.16	Depth	0.44356
KIRC	MXI1	13079	AP	M4543_1.02	0.05	0.32	Depth	0.46856
KIRC	MXI1	13079	AP	M4678_1.02	-0.0147059	0.49	Depth	0.51005
KIRC	MXI1	13079	AP	M4679_1.02	-0.305882	0.13	Depth	0.430329
KIRC	MXI1	13080	AP	M4543_1.02	0.55	0.02	Depth	0.275872
KIRC	MXI1	13080	AP	M4678_1.02	0.194118	0.21	Depth	0.456646
KIRC	MXI1	13080	AP	M4679_1.02	0.758824	0	Depth	0
KIRC	TCF7L2	13138	ES	M6512_1.02	0.0181818	0.44	Depth	0.491324
KIRC	TCF7L2	13141	ES	M6512_1.02	0.457143	0.05	Depth	0.363241
KIRC	TCF7L2	13142	ES	M6512_1.02	-0.545455	0.04	Depth	0.339193
KIRC	TCF7L2	13156	ES	M6512_1.02	0.454545	0.06	Depth	0.374783
KIRC	IRF7	13701	AP	M3480_1.02	-0.305882	0.08	Depth	0.398482
KIRC	IRF7	13701	AP	M5576_1.02	-0.155882	0.33	Depth	0.468733
KIRC	IRF7	13701	AP	M5577_1.02	-0.279412	0.19	Depth	0.452944
KIRC	IRF7	13701	AP	M6312_1.02	-0.211765	0.17	Depth	0.44765
KIRC	IRF7	13703	AP	M3480_1.02	0.305882	0.12	Depth	0.425792
KIRC	IRF7	13703	AP	M5576_1.02	0.155882	0.23	Depth	0.456646
KIRC	IRF7	13703	AP	M5577_1.02	0.279412	0.17	Depth	0.44765
KIRC	IRF7	13703	AP	M6312_1.02	0.211765	0.2	Depth	0.455938
KIRC	TEAD1	14433	AP	M1916_1.02	0.209091	0.24	Depth	0.4595
KIRC	TEAD1	14433	AP	M5905_1.02	0.236364	0.19	Depth	0.452944
KIRC	TEAD1	14434	AP	M1916_1.02	-0.209091	0.18	Depth	0.449969
KIRC	TEAD1	14434	AP	M5905_1.02	-0.236364	0.26	Depth	0.463037
KIRC	ARNTL	14437	AP	M5290_1.02	0.309091	0.2	Depth	0.455938
KIRC	ARNTL	14437	AP	M6162_1.02	0.357576	0.23	Depth	0.456646
KIRC	ARNTL	14438	AP	M5290_1.02	-0.309091	0.18	Depth	0.449969
KIRC	ARNTL	14438	AP	M6162_1.02	-0.357576	0.13	Depth	0.430329
KIRC	ELF5	14951	AT	M5379_1.02	0.448511	0.09	Depth	0.405939
KIRC	ELF5	14952	AT	M5379_1.02	-0.448511	0.08	Depth	0.398482
KIRC	NR1H3	15692	AP	M6383_1.02	0.276471	0.17	Depth	0.44765
KIRC	NR1H3	15694	AP	M6383_1.02	0.0794118	0.41	Depth	0.486495
KIRC	NR1H3	15695	AP	M6383_1.02	-0.370588	0.03	Depth	0.320116
KIRC	ESRRA	16630	AP	M5404_1.02	0.473529	0.03	Depth	0.320116
KIRC	ESRRA	16630	AP	M4663_1.02	-0.311765	0.14	Depth	0.43632
KIRC	ESRRA	16630	AP	M5405_1.02	0.132353	0.33	Depth	0.468733
KIRC	ESRRA	16630	AP	M5409_1.02	0.111765	0.26	Depth	0.463037
KIRC	ESRRA	16631	AP	M5404_1.02	-0.473529	0.03	Depth	0.320116
KIRC	ESRRA	16631	AP	M4663_1.02	0.311765	0.05	Depth	0.363241
KIRC	ESRRA	16631	AP	M5405_1.02	-0.132353	0.35	Depth	0.474663
KIRC	ESRRA	16631	AP	M5409_1.02	-0.111765	0.29	Depth	0.466743
KIRC	OVOL1	16917	AP	M6402_1.02	0.395139	0.12	Depth	0.425792
KIRC	OVOL1	16918	AP	M6402_1.02	-0.395139	0.14	Depth	0.43632
KIRC	ZNF384	19923	ES	M6557_1.02	0.141176	0.27	Depth	0.463037
KIRC	ZNF384	19927	AD	M6557_1.02	0.389993	0.1	Depth	0.410039
KIRC	POU6F1	21806	AP	M3780_1.02	-0.194817	0.23	Depth	0.456646
KIRC	POU6F1	21806	AP	M0899_1.02	-0.151921	0.3	Depth	0.467189
KIRC	NR4A1	21884	AP	M6393_1.02	-0.264706	0.23	Depth	0.456646
KIRC	NR4A1	21887	AP	M6393_1.02	0.264706	0.18	Depth	0.449969
KIRC	RARG	21979	AP	M1435_1.02	0.179412	0.27	Depth	0.463037
KIRC	RARG	21979	AP	M5768_1.02	-0.414706	0.1	Depth	0.410039
KIRC	RARG	21979	AP	M5769_1.02	-0.108824	0.27	Depth	0.463037
KIRC	RARG	21979	AP	M5767_1.02	-0.570588	0.02	Depth	0.275872
KIRC	RARG	21979	AP	M6446_1.02	-0.0676471	0.43	Depth	0.489072
KIRC	RARG	21980	AP	M1435_1.02	-0.179412	0.25	Depth	0.462506
KIRC	RARG	21980	AP	M5768_1.02	0.414706	0.07	Depth	0.390174
KIRC	RARG	21980	AP	M5769_1.02	0.108824	0.35	Depth	0.474663
KIRC	RARG	21980	AP	M5767_1.02	0.570588	0	Depth	0
KIRC	RARG	21980	AP	M6446_1.02	0.0676471	0.39	Depth	0.483684
KIRC	ATF7	22094	AT	M5293_1.02	0.191317	0.28	Depth	0.464162
KIRC	ATF7	22095	AT	M5293_1.02	-0.179412	0.28	Depth	0.464162
KIRC	HOXC6	22115	AP	M6299_1.02	0.494118	0.02	Depth	0.275872
KIRC	HOXC6	22116	AP	M6299_1.02	-0.494118	0.03	Depth	0.320116
KIRC	DDIT3	22628	RI	M6187_1.02	-0.0794118	0.36	Depth	0.474663
KIRC	HMGA2	22877	AT	M6280_1.02	0.38956	0.06	Depth	0.374783
KIRC	HMGA2	22880	AT	M6280_1.02	-0.20445	0.2	Depth	0.455938
KIRC	HMGA2	22881	AT	M6280_1.02	-0.195732	0.22	Depth	0.456646
KIRC	NR1H4	23921	AP	M6384_1.02	0.305882	0.17	Depth	0.44765
KIRC	NR1H4	23922	AP	M6384_1.02	-0.305882	0.23	Depth	0.456646
KIRC	NR1H4	23923	AT	M6384_1.02	-0.102941	0.34	Depth	0.472261
KIRC	NR1H4	23924	AT	M6384_1.02	0.102941	0.37	Depth	0.4769
KIRC	KDM2B	24871	AP	M0607_1.02	0.238236	0.15	Depth	0.438663
KIRC	KDM2B	24873	AP	M0607_1.02	-0.0125112	0.44	Depth	0.491324
KIRC	TFDP1	26385	AP	M6515_1.02	-0.108824	0.32	Depth	0.46856
KIRC	HOMEZ	26723	AP	M5530_1.02	0.00893655	0.48	Depth	0.505364
KIRC	HOMEZ	26724	AP	M5530_1.02	-0.00893655	0.48	Depth	0.505364
KIRC	NRL	26808	AP	M5689_1.02	-0.127273	0.39	Depth	0.483684
KIRC	NFATC4	26982	AP	M6365_1.02	-0.101544	0.38	Depth	0.480523
KIRC	NFATC4	26983	AP	M6365_1.02	-0.247253	0.11	Depth	0.417512
KIRC	NFATC4	26993	AD	M6365_1.02	-0.170588	0.27	Depth	0.463037
KIRC	SIX1	27780	AP	M1049_1.02	0.0337164	0.48	Depth	0.505364
KIRC	SIX1	27781	AP	M1049_1.02	-0.0337164	0.41	Depth	0.486495
KIRC	ESR2	27867	AT	M2065_1.02	-0.264706	0.21	Depth	0.456646
KIRC	ESR2	27867	AT	M6219_1.02	-0.261765	0.15	Depth	0.438663
KIRC	ESR2	27869	AT	M2065_1.02	0.508824	0.02	Depth	0.275872
KIRC	ESR2	27869	AT	M6219_1.02	0.273529	0.13	Depth	0.430329
KIRC	ESR2	27872	RI	M2065_1.02	0.33735	0.16	Depth	0.44356
KIRC	ESR2	27872	RI	M6219_1.02	-0.18165	0.26	Depth	0.463037
KIRC	MAX	27935	RI	M4646_1.02	-0.544118	0	Depth	0
KIRC	MAX	27935	RI	M1889_1.02	-0.405882	0.09	Depth	0.405939
KIRC	MAX	27935	RI	M5613_1.02	-0.588235	0.02	Depth	0.275872
KIRC	JDP2	28500	AP	M5587_1.02	-0.170588	0.27	Depth	0.463037
KIRC	JDP2	28500	AP	M5590_1.02	-0.0352941	0.42	Depth	0.487425
KIRC	JDP2	28502	AP	M5587_1.02	0.00314161	0.48	Depth	0.505364
KIRC	JDP2	28502	AP	M5590_1.02	-0.124094	0.27	Depth	0.463037
KIRC	FOXN3	28792	ES	M0726_1.02	-0.269231	0.19	Depth	0.452944
KIRC	FOXN3	28792	ES	M0756_1.02	-0.346154	0.1	Depth	0.410039
KIRC	FOXN3	28792	ES	M5453_1.02	-0.28022	0.17	Depth	0.44765
KIRC	FOXN3	28792	ES	M5458_1.02	-0.126374	0.32	Depth	0.46856
KIRC	FOXN3	28792	ES	M6241_1.02	-0.269231	0.22	Depth	0.456646
KIRC	FOXN3	28792	ES	M3257_1.02	-0.302198	0.17	Depth	0.44765
KIRC	FOXN3	28792	ES	M6014_1.02	-0.0274725	0.45	Depth	0.494677
KIRC	FOXN3	28792	ES	M6242_1.02	-0.417582	0.04	Depth	0.339193
KIRC	FOXN3	28792	ES	M6243_1.02	-0.351648	0.09	Depth	0.405939
KIRC	KLF13	29803	AP	M5591_1.02	-0.241613	0.16	Depth	0.44356
KIRC	KLF13	29804	AP	M5591_1.02	0.241613	0.22	Depth	0.456646
KIRC	MEIS2	29905	AP	M5619_1.02	0.508824	0.01	Depth	0.203094
KIRC	MEIS2	29905	AP	M5620_1.02	0.447059	0.06	Depth	0.374783
KIRC	MEIS2	29906	AP	M5619_1.02	-0.161765	0.28	Depth	0.464162
KIRC	MEIS2	29906	AP	M5620_1.02	-0.367647	0.06	Depth	0.374783
KIRC	MESP2	32444	AP	M5627_1.02	-0.4	0.1	Depth	0.410039
KIRC	MESP2	32445	AP	M5627_1.02	0.4	0.13	Depth	0.430329
KIRC	NR2F2	32593	AP	M4702_1.02	0.225166	0.14	Depth	0.43632
KIRC	NR2F2	32593	AP	M2960_1.02	-0.301693	0.19	Depth	0.452944
KIRC	NR2F2	32593	AP	M4703_1.02	0.588668	0.01	Depth	0.203094
KIRC	NR2F2	32593	AP	M6179_1.02	0.571008	0.01	Depth	0.203094
KIRC	MEF2A	32713	AP	M6340_1.02	-0.174574	0.28	Depth	0.464162
KIRC	MEF2A	32713	AP	M3550_1.02	0.0109109	0.52	Depth	0.527461
KIRC	MEF2A	32713	AP	M3553_1.02	-0.250951	0.12	Depth	0.425792
KIRC	MEF2A	32713	AP	M4695_1.02	0.0363696	0.47	Depth	0.501079
KIRC	MEF2A	32714	AP	M6340_1.02	0.174574	0.3	Depth	0.467189
KIRC	MEF2A	32714	AP	M3550_1.02	-0.0109109	0.54	Depth	0.54288
KIRC	MEF2A	32714	AP	M3553_1.02	0.250951	0.2	Depth	0.455938
KIRC	MEF2A	32714	AP	M4695_1.02	-0.0363696	0.43	Depth	0.489072
KIRC	ZNF263	33511	ES	M4604_1.02	0.388235	0.07	Depth	0.390174
KIRC	ZNF263	33511	ES	M2324_1.02	0.488235	0.02	Depth	0.275872
KIRC	ZNF263	33512	ES	M4604_1.02	0.0783789	0.37	Depth	0.4769
KIRC	ZNF263	33512	ES	M2324_1.02	0.302319	0.16	Depth	0.44356
KIRC	ZNF263	33514	ES	M4604_1.02	0.488235	0.02	Depth	0.275872
KIRC	ZNF263	33514	ES	M2324_1.02	0.485294	0.01	Depth	0.203094
KIRC	MAZ	35937	AP	M6336_1.02	0.482353	0.05	Depth	0.363241
KIRC	MAZ	35938	AP	M6336_1.02	-0.4	0.08	Depth	0.398482
KIRC	HSF4	36941	RI	M5567_1.02	0.2	0.16	Depth	0.44356
KIRC	HSF4	36944	AA	M5567_1.02	-0.320588	0.15	Depth	0.438663
KIRC	ZFHX3	37557	AP	M0895_1.02	-0.269135	0.16	Depth	0.44356
KIRC	ZFHX3	37557	AP	M6546_1.02	-0.458258	0.01	Depth	0.203094
KIRC	ZFHX3	37558	AP	M0895_1.02	0.269135	0.18	Depth	0.449969
KIRC	ZFHX3	37558	AP	M6546_1.02	0.458258	0.03	Depth	0.320116
KIRC	ZNF232	38656	RI	M5967_1.02	0.314286	0.14	Depth	0.43632
KIRC	ZNF232	38658	ES	M5967_1.02	0.219839	0.19	Depth	0.452944
KIRC	SOX15	39008	AT	M5818_1.02	0.446429	0.03	Depth	0.320116
KIRC	SOX15	39008	AT	M5819_1.02	0.307143	0.12	Depth	0.425792
KIRC	SOX15	39008	AT	M5820_1.02	0.353571	0.1	Depth	0.410039
KIRC	SOX15	39008	AT	M6472_1.02	0.317857	0.11	Depth	0.417512
KIRC	SOX15	39009	AT	M5818_1.02	-0.446429	0.05	Depth	0.363241
KIRC	SOX15	39009	AT	M5819_1.02	-0.307143	0.18	Depth	0.449969
KIRC	SOX15	39009	AT	M5820_1.02	-0.353571	0.14	Depth	0.43632
KIRC	SOX15	39009	AT	M6472_1.02	-0.317857	0.14	Depth	0.43632
KIRC	HNF1B	40545	ES	M5522_1.02	0.0153846	0.45	Depth	0.494677
KIRC	THRA	40839	AT	M5936_1.02	-0.120588	0.21	Depth	0.456646
KIRC	THRA	40839	AT	M6521_1.02	-0.0235294	0.43	Depth	0.489072
KIRC	THRA	40839	AT	M6522_1.02	-0.220588	0.21	Depth	0.456646
KIRC	THRA	40840	AT	M5936_1.02	0.120588	0.31	Depth	0.468376
KIRC	THRA	40840	AT	M6521_1.02	0.0235294	0.43	Depth	0.489072
KIRC	THRA	40840	AT	M6522_1.02	0.220588	0.24	Depth	0.4595
KIRC	RARA	40857	AP	M5763_1.02	0.05	0.43	Depth	0.489072
KIRC	RARA	40857	AP	M5762_1.02	0.0647059	0.4	Depth	0.48512
KIRC	RARA	40857	AP	M5761_1.02	0.152941	0.33	Depth	0.468733
KIRC	RARA	40857	AP	M6443_1.02	0.102941	0.31	Depth	0.468376
KIRC	RARA	40858	AP	M5763_1.02	-0.1	0.44	Depth	0.491324
KIRC	RARA	40858	AP	M5762_1.02	0.0852941	0.31	Depth	0.468376
KIRC	RARA	40858	AP	M5761_1.02	0.0294118	0.48	Depth	0.505364
KIRC	RARA	40858	AP	M6443_1.02	-0.00882353	0.47	Depth	0.501079
KIRC	RARA	40859	AP	M5763_1.02	0.0264706	0.44	Depth	0.491324
KIRC	RARA	40859	AP	M5762_1.02	-0.191176	0.21	Depth	0.456646
KIRC	RARA	40859	AP	M5761_1.02	-0.152941	0.3	Depth	0.467189
KIRC	RARA	40859	AP	M6443_1.02	-0.111765	0.32	Depth	0.46856
KIRC	NFE2L1	42157	AP	M4030_1.02	-0.138235	0.34	Depth	0.472261
KIRC	NFE2L1	42158	AP	M4030_1.02	0.152941	0.31	Depth	0.468376
KIRC	HOXB3	42192	AP	M5542_1.02	0.00588235	0.58	Depth	0.580395
KIRC	HOXB3	42193	AP	M5542_1.02	-0.0750552	0.43	Depth	0.489072
KIRC	HOXB3	42195	AP	M5542_1.02	0.237192	0.19	Depth	0.452944
KIRC	HLF	42576	AP	M3393_1.02	-0.578277	0	Depth	0
KIRC	BPTF	43117	ES	M3234_1.02	-0.470427	0.08	Depth	0.398482
KIRC	BPTF	43117	ES	M6163_1.02	-0.456672	0.09	Depth	0.405939
KIRC	TGIF1	44497	AP	M4064_1.02	-0.252941	0.15	Depth	0.438663
KIRC	TGIF1	44497	AP	M5933_1.02	-0.402941	0.09	Depth	0.405939
KIRC	TGIF1	44497	AP	M6519_1.02	0.205882	0.27	Depth	0.463037
KIRC	TGIF1	44497	AP	M6520_1.02	-0.432353	0.02	Depth	0.275872
KIRC	TGIF1	44503	AP	M4064_1.02	0.0617647	0.46	Depth	0.496757
KIRC	TGIF1	44503	AP	M5933_1.02	0.179412	0.22	Depth	0.456646
KIRC	TGIF1	44503	AP	M6519_1.02	-0.441176	0.04	Depth	0.339193
KIRC	TGIF1	44503	AP	M6520_1.02	0.205882	0.27	Depth	0.463037
KIRC	TGIF1	44507	AD	M4064_1.02	0.373529	0.1	Depth	0.410039
KIRC	TGIF1	44507	AD	M5933_1.02	0.241176	0.2	Depth	0.455938
KIRC	TGIF1	44507	AD	M6519_1.02	0.258824	0.16	Depth	0.44356
KIRC	TGIF1	44507	AD	M6520_1.02	0.429412	0.06	Depth	0.374783
KIRC	TGIF1	44508	AD	M4064_1.02	0.410977	0.07	Depth	0.390174
KIRC	TGIF1	44508	AD	M5933_1.02	0.327327	0.09	Depth	0.405939
KIRC	TGIF1	44508	AD	M6519_1.02	0.207307	0.16	Depth	0.44356
KIRC	TGIF1	44508	AD	M6520_1.02	0.440073	0.09	Depth	0.405939
KIRC	TGIF1	44512	ES	M4064_1.02	0.154545	0.3	Depth	0.467189
KIRC	TGIF1	44512	ES	M5933_1.02	0.309091	0.11	Depth	0.417512
KIRC	TGIF1	44512	ES	M6519_1.02	0.136364	0.29	Depth	0.466743
KIRC	TGIF1	44512	ES	M6520_1.02	0.290909	0.23	Depth	0.456646
KIRC	TCF4	45609	AP	M5901_1.02	0.102941	0.39	Depth	0.483684
KIRC	NFIC	46679	ES	M1970_1.02	0.0794118	0.41	Depth	0.486495
KIRC	NFIC	46680	ES	M1970_1.02	-0.0823529	0.39	Depth	0.483684
KIRC	NFIX	47901	AP	M5664_1.02	0.324176	0.17	Depth	0.44765
KIRC	NFIX	47901	AP	M5666_1.02	-0.10989	0.36	Depth	0.474663
KIRC	NFIX	47903	AP	M5664_1.02	-0.175824	0.29	Depth	0.466743
KIRC	NFIX	47903	AP	M5666_1.02	0.104396	0.33	Depth	0.468733
KIRC	ZNF333	48017	AT	M6555_1.02	-0.311765	0.13	Depth	0.430329
KIRC	ZNF333	48020	AT	M6555_1.02	0.126471	0.36	Depth	0.474663
KIRC	ZNF333	48021	AA	M6555_1.02	0.021978	0.53	Depth	0.535242
KIRC	ZNF333	48022	ES	M6555_1.02	-0.217163	0.25	Depth	0.462506
KIRC	MEF2B	48600	ES	M5616_1.02	0.191344	0.27	Depth	0.463037
KIRC	PBX4	48662	AD	M4961_1.02	0.31194	0.12	Depth	0.425792
KIRC	PBX4	48662	AD	M1898_1.02	0.330289	0.18	Depth	0.449969
KIRC	PBX4	48662	AD	M1082_1.02	0.440386	0.07	Depth	0.390174
KIRC	PBX4	48662	AD	M6413_1.02	0.486259	0.01	Depth	0.203094
KIRC	PBX4	48662	AD	M4473_1.02	0.44956	0.07	Depth	0.390174
KIRC	PBX4	48662	AD	M4959_1.02	0.183494	0.24	Depth	0.4595
KIRC	FOSB	50452	RI	M6228_1.02	0.189846	0.21	Depth	0.456646
KIRC	MEIS3	50642	AT	M5621_1.02	0.0294118	0.51	Depth	0.521273
KIRC	MEIS3	50642	AT	M5622_1.02	-0.00294118	0.55	Depth	0.552178
KIRC	MEIS3	50643	AT	M5621_1.02	-0.0294118	0.48	Depth	0.505364
KIRC	MEIS3	50643	AT	M5622_1.02	0.00294118	0.46	Depth	0.496757
KIRC	MEIS3	50645	AA	M5621_1.02	-0.353571	0.1	Depth	0.410039
KIRC	MEIS3	50645	AA	M5622_1.02	-0.171429	0.21	Depth	0.456646
KIRC	DBP	50798	AD	M5337_1.02	-0.231149	0.26	Depth	0.463037
KIRC	DBP	50798	AD	M6186_1.02	0.107511	0.33	Depth	0.468733
KIRC	IRF3	50997	AD	M5572_1.02	-0.0607686	0.46	Depth	0.496757
KIRC	IRF3	50997	AD	M6309_1.02	0.0142985	0.54	Depth	0.54288
KIRC	IRF3	51032	AA	M5572_1.02	-0.398601	0.08	Depth	0.398482
KIRC	IRF3	51032	AA	M6309_1.02	-0.181818	0.21	Depth	0.456646
KIRC	ATF5	51133	AP	M6154_1.02	0.420588	0.03	Depth	0.320116
KIRC	ATF5	51134	AP	M6154_1.02	-0.420588	0.03	Depth	0.320116
KIRC	ZNF524	52115	AP	M5974_1.02	-0.235294	0.17	Depth	0.44765
KIRC	ZNF524	52115	AP	M5975_1.02	-0.241176	0.17	Depth	0.44765
KIRC	ZNF524	52116	AP	M5974_1.02	0.235294	0.18	Depth	0.449969
KIRC	ZNF524	52116	AP	M5975_1.02	0.241176	0.19	Depth	0.452944
KIRC	MZF1	52490	AD	M3594_1.02	0.357198	0.07	Depth	0.390174
KIRC	MZF1	52490	AD	M1888_1.02	0	0.51	Depth	0.521273
KIRC	BCL11A	53658	AT	M4453_1.02	-0.252941	0.25	Depth	0.462506
KIRC	BCL11A	53659	AT	M4453_1.02	0.252941	0.14	Depth	0.43632
KIRC	BCL11A	53662	AD	M4453_1.02	-0.200418	0.25	Depth	0.462506
KIRC	BCL11A	53664	AD	M4453_1.02	-0.292308	0.2	Depth	0.455938
KIRC	ARID5A	54532	ES	M0108_1.02	-0.105882	0.29	Depth	0.466743
KIRC	NR4A2	55613	AP	M5687_1.02	0.379412	0.08	Depth	0.398482
KIRC	NR4A2	55613	AP	M5685_1.02	0.452941	0.03	Depth	0.320116
KIRC	NR4A2	55613	AP	M5686_1.02	0.320588	0.12	Depth	0.425792
KIRC	NR4A2	55614	AP	M5687_1.02	-0.361765	0.05	Depth	0.363241
KIRC	NR4A2	55614	AP	M5685_1.02	-0.423529	0.05	Depth	0.363241
KIRC	NR4A2	55614	AP	M5686_1.02	-0.352941	0.12	Depth	0.425792
KIRC	ATF2	56090	ES	M3087_1.02	-0.0618102	0.43	Depth	0.489072
KIRC	ATF2	56090	ES	M3088_1.02	-0.173657	0.27	Depth	0.463037
KIRC	HOXD8	56111	ES	M5563_1.02	-0.265235	0.2	Depth	0.455938
KIRC	HOXD3	56114	AP	M1071_1.02	-0.376471	0.03	Depth	0.320116
KIRC	HOXD3	56115	AP	M1071_1.02	0.197037	0.19	Depth	0.452944
KIRC	HOXD3	56116	AP	M1071_1.02	0.376471	0.03	Depth	0.320116
KIRC	STAT1	56594	AT	M6493_1.02	0.379412	0.06	Depth	0.374783
KIRC	STAT1	56594	AT	M3966_1.02	0.535294	0.02	Depth	0.275872
KIRC	STAT1	56594	AT	M3968_1.02	0.644118	0.01	Depth	0.203094
KIRC	STAT1	56594	AT	M4707_1.02	0.476471	0.04	Depth	0.339193
KIRC	STAT1	56595	AT	M6493_1.02	-0.379412	0.08	Depth	0.398482
KIRC	STAT1	56595	AT	M3966_1.02	-0.535294	0.01	Depth	0.203094
KIRC	STAT1	56595	AT	M3968_1.02	-0.644118	0	Depth	0
KIRC	STAT1	56595	AT	M4707_1.02	-0.476471	0.02	Depth	0.275872
KIRC	HNF4A	59465	AD	M6283_1.02	-0.0357143	0.43	Depth	0.489072
KIRC	HNF4A	59465	AD	M5524_1.02	-0.396429	0.07	Depth	0.390174
KIRC	HNF4A	59465	AD	M5527_1.02	-0.225	0.2	Depth	0.455938
KIRC	HNF4A	59465	AD	M5525_1.02	-0.0642857	0.44	Depth	0.491324
KIRC	HNF4A	59465	AD	M4699_1.02	-0.353571	0.11	Depth	0.417512
KIRC	HNF4A	59465	AD	M5529_1.02	-0.285714	0.16	Depth	0.44356
KIRC	GABPA	60277	AP	M4505_1.02	-0.314286	0.06	Depth	0.374783
KIRC	GABPA	60278	AP	M4505_1.02	0.314286	0.13	Depth	0.430329
KIRC	BACH1	60322	AP	M2979_1.02	-0.116484	0.39	Depth	0.483684
KIRC	BACH1	60322	AP	M4680_1.02	-0.125275	0.34	Depth	0.472261
KIRC	BACH1	60322	AP	M4681_1.02	-0.12967	0.39	Depth	0.483684
KIRC	BACH1	60322	AP	M4682_1.02	-0.0285714	0.48	Depth	0.505364
KIRC	BACH1	60322	AP	M6156_1.02	-0.2	0.28	Depth	0.464162
KIRC	BACH1	60323	AP	M2979_1.02	0.116484	0.32	Depth	0.46856
KIRC	BACH1	60323	AP	M4680_1.02	0.125275	0.3	Depth	0.467189
KIRC	BACH1	60323	AP	M4681_1.02	0.12967	0.4	Depth	0.48512
KIRC	BACH1	60323	AP	M4682_1.02	0.0285714	0.46	Depth	0.496757
KIRC	BACH1	60323	AP	M6156_1.02	0.2	0.27	Depth	0.463037
KIRC	PATZ1	61844	AT	M3546_1.02	-0.338235	0.11	Depth	0.417512
KIRC	PATZ1	61845	AT	M3546_1.02	0.338235	0.07	Depth	0.390174
KIRC	PATZ1	61847	ES	M3546_1.02	-0.173529	0.24	Depth	0.4595
KIRC	TEF	62421	AP	M5910_1.02	0.621429	0.03	Depth	0.320116
KIRC	TEF	62421	AP	M6510_1.02	0.639286	0.03	Depth	0.320116
KIRC	TEF	62422	AP	M5910_1.02	-0.621429	0	Depth	0
KIRC	TEF	62422	AP	M6510_1.02	-0.639286	0	Depth	0
KIRC	PPARA	62690	ES	M3781_1.02	-0.398803	0.12	Depth	0.425792
KIRC	PPARA	62690	ES	M6430_1.02	-0.460157	0.15	Depth	0.438663
KIRC	PPARA	62690	ES	M6431_1.02	-0.190198	0.3	Depth	0.467189
KIRC	PPARG	63414	AP	M1894_1.02	0.364706	0.15	Depth	0.438663
KIRC	PPARG	63414	AP	M3783_1.02	-0.197059	0.23	Depth	0.456646
KIRC	PPARG	63414	AP	M3785_1.02	-0.0588235	0.41	Depth	0.486495
KIRC	PPARG	63414	AP	M6433_1.02	0.0294118	0.38	Depth	0.480523
KIRC	PPARG	63414	AP	M6434_1.02	0.00882353	0.42	Depth	0.487425
KIRC	PPARG	63415	AP	M1894_1.02	-0.420588	0.05	Depth	0.363241
KIRC	PPARG	63415	AP	M3783_1.02	0.311765	0.13	Depth	0.430329
KIRC	PPARG	63415	AP	M3785_1.02	0.161765	0.19	Depth	0.452944
KIRC	PPARG	63415	AP	M6433_1.02	0.114706	0.4	Depth	0.48512
KIRC	PPARG	63415	AP	M6434_1.02	0.0205882	0.45	Depth	0.494677
KIRC	ZNF35	64379	ES	M0436_1.02	-0.506236	0.04	Depth	0.339193
KIRC	ZNF589	64578	ES	M6559_1.02	-0.681818	0.03	Depth	0.320116
KIRC	MITF	65584	AP	M6345_1.02	0.185411	0.28	Depth	0.464162
KIRC	MITF	65585	AP	M6345_1.02	0.0857143	0.45	Depth	0.494677
KIRC	MITF	65586	AP	M6345_1.02	0.433444	0.03	Depth	0.320116
KIRC	FOXP1	65608	ES	M0717_1.02	-0.317647	0.11	Depth	0.417512
KIRC	FOXP1	65608	ES	M2283_1.02	-0.352941	0.08	Depth	0.398482
KIRC	BBX	66005	AP	M1583_1.02	-0.572727	0.07	Depth	0.390174
KIRC	BBX	66006	AP	M1583_1.02	0.572727	0.02	Depth	0.275872
KIRC	BBX	66009	ES	M1583_1.02	-0.692857	0	Depth	0
KIRC	TFDP2	67093	ES	M6515_1.02	0.475809	0.02	Depth	0.275872
KIRC	TFDP2	67101	ES	M6515_1.02	-0.0373626	0.46	Depth	0.496757
KIRC	MECOM	67567	AP	M3227_1.02	-0.0678571	0.32	Depth	0.46856
KIRC	MECOM	67567	AP	M3225_1.02	-0.1	0.25	Depth	0.462506
KIRC	MECOM	67567	AP	M3228_1.02	-0.160714	0.26	Depth	0.463037
KIRC	MECOM	67567	AP	M3230_1.02	-0.0785714	0.44	Depth	0.491324
KIRC	MECOM	67568	AP	M3227_1.02	-0.167857	0.28	Depth	0.464162
KIRC	MECOM	67568	AP	M3225_1.02	-0.185714	0.27	Depth	0.463037
KIRC	MECOM	67568	AP	M3228_1.02	-0.339286	0.09	Depth	0.405939
KIRC	MECOM	67568	AP	M3230_1.02	-0.203571	0.32	Depth	0.46856
KIRC	MECOM	67570	AP	M3227_1.02	0.325291	0.14	Depth	0.43632
KIRC	MECOM	67570	AP	M3225_1.02	0.37891	0.08	Depth	0.398482
KIRC	MECOM	67570	AP	M3228_1.02	0.623771	0.01	Depth	0.203094
KIRC	MECOM	67570	AP	M3230_1.02	0.478999	0.01	Depth	0.203094
KIRC	BCL6	68079	AP	M6159_1.02	0.0647059	0.42	Depth	0.487425
KIRC	BCL6	68081	AP	M6159_1.02	-0.0647059	0.43	Depth	0.489072
KIRC	RBPJ	68984	ES	M6499_1.02	-0.389286	0.09	Depth	0.405939
KIRC	LEF1	70286	AP	M5596_1.02	0.136414	0.32	Depth	0.46856
KIRC	LEF1	70286	AP	M6327_1.02	0.10341	0.23	Depth	0.456646
KIRC	LEF1	70287	AP	M5596_1.02	-0.136414	0.35	Depth	0.474663
KIRC	LEF1	70287	AP	M6327_1.02	-0.10341	0.42	Depth	0.487425
KIRC	LEF1	70292	ES	M5596_1.02	0.143054	0.3	Depth	0.467189
KIRC	LEF1	70292	ES	M6327_1.02	0.110041	0.36	Depth	0.474663
KIRC	ELF2	70608	AP	M6204_1.02	0.485294	0.06	Depth	0.374783
KIRC	ELF2	70610	AP	M6204_1.02	-0.485294	0.02	Depth	0.275872
KIRC	RREB1	75253	ES	M1901_1.02	-0.167647	0.31	Depth	0.468376
KIRC	RREB1	75253	ES	M3843_1.02	-0.211765	0.2	Depth	0.455938
KIRC	ZNF76	75901	AA	M1915_1.02	-0.0392857	0.46	Depth	0.496757
KIRC	NFYA	76094	ES	M1890_1.02	0.129507	0.33	Depth	0.468733
KIRC	NFYA	76094	ES	M3628_1.02	0.110375	0.36	Depth	0.474663
KIRC	RUNX2	76398	AP	M2310_1.02	-0.0540562	0.47	Depth	0.501079
KIRC	RUNX2	76398	AP	M5788_1.02	-0.0630656	0.42	Depth	0.487425
KIRC	RUNX2	76398	AP	M5789_1.02	-0.0450469	0.47	Depth	0.501079
KIRC	RUNX2	76398	AP	M5790_1.02	-0.0468487	0.42	Depth	0.487425
KIRC	RUNX2	76399	AP	M2310_1.02	0.0540562	0.39	Depth	0.483684
KIRC	RUNX2	76399	AP	M5788_1.02	0.0630656	0.43	Depth	0.489072
KIRC	RUNX2	76399	AP	M5789_1.02	0.0450469	0.5	Depth	0.515062
KIRC	RUNX2	76399	AP	M5790_1.02	0.0468487	0.39	Depth	0.483684
KIRC	RUNX2	76401	AT	M2310_1.02	0.0852941	0.36	Depth	0.474663
KIRC	RUNX2	76401	AT	M5788_1.02	0.126471	0.31	Depth	0.468376
KIRC	RUNX2	76401	AT	M5789_1.02	-0.123529	0.36	Depth	0.474663
KIRC	RUNX2	76401	AT	M5790_1.02	0.0470588	0.31	Depth	0.468376
KIRC	RUNX2	76402	AT	M2310_1.02	-0.0852941	0.31	Depth	0.468376
KIRC	RUNX2	76402	AT	M5788_1.02	-0.126471	0.39	Depth	0.483684
KIRC	RUNX2	76402	AT	M5789_1.02	0.123529	0.22	Depth	0.456646
KIRC	RUNX2	76402	AT	M5790_1.02	-0.0470588	0.42	Depth	0.487425
KIRC	TBX18	76914	AT	M5880_1.02	0.14415	0.29	Depth	0.466743
KIRC	TBX18	76914	AT	M5881_1.02	0.356771	0.07	Depth	0.390174
KIRC	TBX18	76915	AT	M5880_1.02	-0.14415	0.31	Depth	0.468376
KIRC	TBX18	76915	AT	M5881_1.02	-0.356771	0.1	Depth	0.410039
KIRC	PRDM1	77110	AP	M2307_1.02	0.431613	0.11	Depth	0.417512
KIRC	PRDM1	77110	AP	M4686_1.02	0.182372	0.28	Depth	0.464162
KIRC	PRDM1	77110	AP	M4687_1.02	0.139818	0.46	Depth	0.496757
KIRC	PRDM1	77111	AP	M2307_1.02	-0.431613	0.09	Depth	0.405939
KIRC	PRDM1	77111	AP	M4686_1.02	-0.182372	0.32	Depth	0.46856
KIRC	PRDM1	77111	AP	M4687_1.02	-0.139818	0.34	Depth	0.472261
KIRC	TCF21	77767	RI	M0214_1.02	-0.229338	0.2	Depth	0.455938
KIRC	MYB	77817	ES	M3585_1.02	0.396017	0.15	Depth	0.438663
KIRC	MYB	77817	ES	M3068_1.02	0.546231	0.06	Depth	0.374783
KIRC	MYB	77818	ES	M3585_1.02	0.434296	0.06	Depth	0.374783
KIRC	MYB	77818	ES	M3068_1.02	0.434296	0.07	Depth	0.390174
KIRC	PLAGL1	77989	AP	M6422_1.02	-0.0133337	0.54	Depth	0.54288
KIRC	PLAGL1	77991	AP	M6422_1.02	0.0294334	0.52	Depth	0.527461
KIRC	PLAGL1	77994	AP	M6422_1.02	0.223529	0.16	Depth	0.44356
KIRC	PLAGL1	77995	ES	M6422_1.02	-0.0882353	0.38	Depth	0.480523
KIRC	PLAGL1	78001	RI	M6422_1.02	-0.255882	0.14	Depth	0.43632
KIRC	PLAGL1	78005	AA	M6422_1.02	-0.158523	0.26	Depth	0.463037
KIRC	PLAGL1	78006	AA	M6422_1.02	-0.195323	0.23	Depth	0.456646
KIRC	PLAGL1	78007	AA	M6422_1.02	-0.359122	0.18	Depth	0.449969
KIRC	PLAGL1	78017	ES	M6422_1.02	-0.0629371	0.43	Depth	0.489072
KIRC	ESR1	78166	AT	M6217_1.02	-0.0176471	0.42	Depth	0.487425
KIRC	ESR1	78166	AT	M4697_1.02	-0.182353	0.29	Depth	0.466743
KIRC	ESR1	78166	AT	M3206_1.02	0.373529	0.05	Depth	0.363241
KIRC	ESR1	78167	AT	M6217_1.02	0.0176471	0.5	Depth	0.515062
KIRC	ESR1	78167	AT	M4697_1.02	0.182353	0.26	Depth	0.463037
KIRC	ESR1	78167	AT	M3206_1.02	-0.373529	0.11	Depth	0.417512
KIRC	HOXA3	79051	AP	M3433_1.02	0.168565	0.26	Depth	0.463037
KIRC	HOXA3	79052	AP	M3433_1.02	-0.168565	0.33	Depth	0.468733
KIRC	HOXA9	79054	RI	M5531_1.02	0	0.48	Depth	0.505364
KIRC	HOXA9	79054	RI	M5532_1.02	-0.139286	0.36	Depth	0.474663
KIRC	HOXA9	79054	RI	M6289_1.02	-0.0821429	0.38	Depth	0.480523
KIRC	HOXA9	79054	RI	M6294_1.02	-0.253571	0.23	Depth	0.456646
KIRC	MLXIPL	79992	AA	M5633_1.02	-0.55846	0.05	Depth	0.363241
KIRC	MLXIPL	79992	AA	M6346_1.02	-0.31912	0.15	Depth	0.438663
KIRC	ZKSCAN1	80872	ES	M0408_1.02	-0.161765	0.28	Depth	0.464162
KIRC	TFEC	81515	AP	M5932_1.02	0.384615	0.11	Depth	0.417512
KIRC	TFEC	81516	AP	M5932_1.02	-0.0883991	0.34	Depth	0.472261
KIRC	TFEC	81517	AP	M5932_1.02	-0.236264	0.2	Depth	0.455938
KIRC	E2F5	84324	AP	M6194_1.02	0.234065	0.15	Depth	0.438663
KIRC	E2F5	84325	AP	M6194_1.02	-0.234065	0.23	Depth	0.456646
KIRC	NFIB	85886	ES	M5662_1.02	0.110011	0.34	Depth	0.472261
KIRC	NFIB	85891	ES	M5662_1.02	0.38022	0.1	Depth	0.410039
KIRC	PBX3	87588	AP	M4473_1.02	0.375276	0.11	Depth	0.417512
KIRC	PBX3	87589	AP	M4473_1.02	-0.375276	0.07	Depth	0.390174
KIRC	ZNF263	93849	ES	M4604_1.02	-0.109091	0.34	Depth	0.472261
KIRC	ZNF263	93849	ES	M2324_1.02	0.1	0.39	Depth	0.483684
KIRC	ZBTB7B	101303	ES	M5961_1.02	-0.818182	0.01	Depth	0.203094
KIRC	ZBTB7B	101303	ES	M6539_1.02	-0.781818	0.02	Depth	0.275872
KIRC	PAX8	102558	ES	M6411_1.02	-0.207143	0.23	Depth	0.456646
KIRC	ZNF263	103139	ES	M4604_1.02	-0.0363636	0.44	Depth	0.491324
KIRC	ZNF263	103139	ES	M2324_1.02	0.181818	0.29	Depth	0.466743
KIRC	TCF7L2	151705	ME	M6512_1.02	-0.917582	0	Depth	0
KIRP	HES2	400	AT	M0199_1.02	-0.0785428	0.26	Depth	0.463037
KIRP	HES2	401	AT	M0199_1.02	0.0785428	0.29	Depth	0.466743
KIRP	ZNF691	2127	ES	M0428_1.02	-0.427481	0.02	Depth	0.275872
KIRP	NFIA	3223	AP	M5660_1.02	-0.232892	0.14	Depth	0.43632
KIRP	NFIA	3223	AP	M5661_1.02	-0.197027	0.11	Depth	0.417512
KIRP	CREB3L4	7768	AP	M5323_1.02	-0.183455	0.17	Depth	0.44765
KIRP	CREB3L4	7769	AP	M5323_1.02	0.183455	0.15	Depth	0.438663
KIRP	NR1I3	8622	AT	M6387_1.02	0.189586	0.12	Depth	0.425792
KIRP	NR1I3	8622	AT	M6388_1.02	0.107627	0.23	Depth	0.456646
KIRP	NR1I3	8624	AT	M6387_1.02	-0.189586	0.16	Depth	0.44356
KIRP	NR1I3	8624	AT	M6388_1.02	-0.107627	0.31	Depth	0.468376
KIRP	ESRRG	9808	AP	M5413_1.02	0.406181	0.09	Depth	0.405939
KIRP	ESRRG	9808	AP	M5411_1.02	0.522233	0	Depth	0
KIRP	ESRRG	9808	AP	M5412_1.02	0.522233	0	Depth	0
KIRP	ESRRG	9812	AP	M5413_1.02	0.00606061	0.53	Depth	0.535242
KIRP	ESRRG	9812	AP	M5411_1.02	-0.00606061	0.57	Depth	0.57101
KIRP	ESRRG	9812	AP	M5412_1.02	0.333333	0.15	Depth	0.438663
KIRP	ESRRG	9814	AP	M5413_1.02	-0.522233	0	Depth	0
KIRP	ESRRG	9814	AP	M5411_1.02	-0.290129	0.22	Depth	0.456646
KIRP	ESRRG	9814	AP	M5412_1.02	-0.290129	0.22	Depth	0.456646
KIRP	CREM	11229	AP	M6181_1.02	-0.16863	0.18	Depth	0.449969
KIRP	CREM	11230	AP	M6181_1.02	0.439652	0.01	Depth	0.203094
KIRP	CREM	11232	AP	M6181_1.02	0.0307744	0.4	Depth	0.48512
KIRP	CREM	11261	ES	M6181_1.02	-0.000772207	0.49	Depth	0.51005
KIRP	CREM	11264	ES	M6181_1.02	0.128594	0.28	Depth	0.464162
KIRP	NFKB2	12948	AA	M5669_1.02	-0.30183	0.07	Depth	0.390174
KIRP	NFKB2	12948	AA	M6370_1.02	0.120665	0.25	Depth	0.462506
KIRP	MXI1	13079	AP	M4543_1.02	-0.0991935	0.27	Depth	0.463037
KIRP	MXI1	13079	AP	M4678_1.02	0.575403	0	Depth	0
KIRP	MXI1	13079	AP	M4679_1.02	-0.340323	0.05	Depth	0.363241
KIRP	MXI1	13080	AP	M4543_1.02	-0.259905	0.08	Depth	0.398482
KIRP	MXI1	13080	AP	M4678_1.02	0.12098	0.27	Depth	0.463037
KIRP	MXI1	13080	AP	M4679_1.02	-0.14941	0.2	Depth	0.455938
KIRP	MXI1	13081	AP	M4543_1.02	0.229839	0.12	Depth	0.425792
KIRP	MXI1	13081	AP	M4678_1.02	-0.567339	0.01	Depth	0.203094
KIRP	MXI1	13081	AP	M4679_1.02	0.358468	0.03	Depth	0.320116
KIRP	TCF7L2	13138	ES	M6512_1.02	0.227671	0.26	Depth	0.463037
KIRP	TCF7L2	13139	ES	M6512_1.02	-0.236364	0.22	Depth	0.456646
KIRP	TCF7L2	13141	ES	M6512_1.02	-0.0695031	0.4	Depth	0.48512
KIRP	TCF7L2	13142	ES	M6512_1.02	-0.077029	0.34	Depth	0.472261
KIRP	TCF7L2	13156	ES	M6512_1.02	-0.291718	0.06	Depth	0.374783
KIRP	TEAD1	14436	ES	M1916_1.02	-0.42503	0.1	Depth	0.410039
KIRP	TEAD1	14436	ES	M5905_1.02	0.141677	0.34	Depth	0.472261
KIRP	ELF5	14951	AT	M5379_1.02	-0.136134	0.22	Depth	0.456646
KIRP	ELF5	14952	AT	M5379_1.02	0.136134	0.27	Depth	0.463037
KIRP	NR1H3	15692	AP	M6383_1.02	0.134531	0.22	Depth	0.456646
KIRP	NR1H3	15695	AP	M6383_1.02	0.0542572	0.45	Depth	0.494677
KIRP	CREBZF	18137	RI	M0307_1.02	-0.338014	0.01	Depth	0.203094
KIRP	ZNF384	19923	ES	M6557_1.02	-0.0511364	0.41	Depth	0.486495
KIRP	ZNF384	19926	ES	M6557_1.02	0.0628466	0.39	Depth	0.483684
KIRP	POU6F1	21804	AP	M3780_1.02	-0.336996	0.02	Depth	0.275872
KIRP	POU6F1	21804	AP	M0899_1.02	-0.277167	0.1	Depth	0.410039
KIRP	POU6F1	21806	AP	M3780_1.02	0.315211	0.06	Depth	0.374783
KIRP	POU6F1	21806	AP	M0899_1.02	0.381185	0.05	Depth	0.363241
KIRP	NR4A1	21884	AP	M6393_1.02	0.346257	0.08	Depth	0.398482
KIRP	NR4A1	21887	AP	M6393_1.02	-0.338235	0	Depth	0
KIRP	ATF7	22094	AT	M5293_1.02	0.148396	0.17	Depth	0.44765
KIRP	ATF7	22095	AT	M5293_1.02	-0.15508	0.21	Depth	0.456646
KIRP	STAT6	22531	ES	M3992_1.02	-0.020248	0.52	Depth	0.527461
KIRP	STAT6	22531	ES	M6497_1.02	0.0123249	0.4	Depth	0.48512
KIRP	DDIT3	22628	RI	M6187_1.02	0.272393	0.04	Depth	0.339193
KIRP	HMGA2	22877	AT	M6280_1.02	-0.101378	0.26	Depth	0.463037
KIRP	HMGA2	22880	AT	M6280_1.02	-0.0282443	0.5	Depth	0.515062
KIRP	NR1H4	23921	AP	M6384_1.02	-0.330074	0.03	Depth	0.320116
KIRP	NR1H4	23922	AP	M6384_1.02	0.330074	0.05	Depth	0.363241
KIRP	NR1H4	23923	AT	M6384_1.02	0.0444519	0.34	Depth	0.472261
KIRP	NR1H4	23924	AT	M6384_1.02	-0.0444519	0.36	Depth	0.474663
KIRP	KDM2B	24873	AP	M0607_1.02	-0.0284793	0.46	Depth	0.496757
KIRP	KDM2B	24876	AT	M0607_1.02	0.145053	0.25	Depth	0.462506
KIRP	TFDP1	26385	AP	M6515_1.02	-0.0516129	0.45	Depth	0.494677
KIRP	TFDP1	26386	AP	M6515_1.02	-0.156048	0.18	Depth	0.449969
KIRP	NFATC4	26988	AP	M6365_1.02	-0.0293621	0.47	Depth	0.501079
KIRP	HIF1A	27803	AA	M6275_1.02	0.0602767	0.39	Depth	0.483684
KIRP	KLF13	29803	AP	M5591_1.02	-0.201432	0.08	Depth	0.398482
KIRP	KLF13	29804	AP	M5591_1.02	0.201432	0.15	Depth	0.438663
KIRP	MEIS2	29905	AP	M5619_1.02	0.0737631	0.36	Depth	0.474663
KIRP	MEIS2	29905	AP	M5620_1.02	0.132574	0.36	Depth	0.474663
KIRP	MEIS2	29906	AP	M5619_1.02	-0.310848	0.06	Depth	0.374783
KIRP	MEIS2	29906	AP	M5620_1.02	-0.355819	0.02	Depth	0.275872
KIRP	MEF2A	32717	ME	M6340_1.02	0.0944001	0.36	Depth	0.474663
KIRP	MEF2A	32717	ME	M3550_1.02	0.250756	0.09	Depth	0.405939
KIRP	MEF2A	32717	ME	M3553_1.02	0.118779	0.19	Depth	0.452944
KIRP	MEF2A	32717	ME	M4695_1.02	0.200898	0.13	Depth	0.430329
KIRP	ZNF263	33511	ES	M4604_1.02	-0.0822913	0.4	Depth	0.48512
KIRP	ZNF263	33511	ES	M2324_1.02	-0.121017	0.24	Depth	0.4595
KIRP	MAZ	35942	ES	M6336_1.02	0.444853	0	Depth	0
KIRP	HSF4	36941	RI	M5567_1.02	-0.182821	0.13	Depth	0.430329
KIRP	NFATC3	37186	ES	M1517_1.02	0.129523	0.26	Depth	0.463037
KIRP	SOX15	39008	AT	M5818_1.02	-0.00161421	0.45	Depth	0.494677
KIRP	SOX15	39008	AT	M5819_1.02	0.0635593	0.31	Depth	0.468376
KIRP	SOX15	39008	AT	M5820_1.02	-0.0528652	0.36	Depth	0.474663
KIRP	SOX15	39008	AT	M6472_1.02	-0.0579096	0.41	Depth	0.486495
KIRP	SOX15	39009	AT	M5818_1.02	0.00161421	0.5	Depth	0.515062
KIRP	SOX15	39009	AT	M5819_1.02	-0.0635593	0.4	Depth	0.48512
KIRP	SOX15	39009	AT	M5820_1.02	0.0528652	0.4	Depth	0.48512
KIRP	SOX15	39009	AT	M6472_1.02	0.0579096	0.37	Depth	0.4769
KIRP	SREBF1	39507	ES	M2387_1.02	-0.32448	0.03	Depth	0.320116
KIRP	SREBF1	39507	ES	M3944_1.02	-0.235181	0.13	Depth	0.430329
KIRP	THRA	40839	AT	M5936_1.02	-0.0349294	0.41	Depth	0.486495
KIRP	THRA	40839	AT	M6521_1.02	-0.0228963	0.47	Depth	0.501079
KIRP	THRA	40839	AT	M6522_1.02	-0.0753739	0.37	Depth	0.4769
KIRP	THRA	40840	AT	M5936_1.02	0.0349294	0.45	Depth	0.494677
KIRP	THRA	40840	AT	M6521_1.02	0.0228963	0.47	Depth	0.501079
KIRP	THRA	40840	AT	M6522_1.02	0.0753739	0.3	Depth	0.467189
KIRP	RARA	40858	AP	M5763_1.02	-0.0340909	0.49	Depth	0.51005
KIRP	RARA	40858	AP	M5762_1.02	-0.0765374	0.33	Depth	0.468733
KIRP	RARA	40858	AP	M5761_1.02	-0.0608289	0.31	Depth	0.468376
KIRP	RARA	40858	AP	M6443_1.02	0.0611631	0.39	Depth	0.483684
KIRP	RARA	40859	AP	M5763_1.02	-0.17481	0.22	Depth	0.456646
KIRP	RARA	40859	AP	M5762_1.02	0.291127	0.1	Depth	0.410039
KIRP	RARA	40859	AP	M5761_1.02	-0.182687	0.24	Depth	0.4595
KIRP	RARA	40859	AP	M6443_1.02	-0.142798	0.19	Depth	0.452944
KIRP	HOXB3	42192	AP	M5542_1.02	-0.296107	0.09	Depth	0.405939
KIRP	HOXB3	42193	AP	M5542_1.02	0.367297	0	Depth	0
KIRP	HOXB3	42195	AP	M5542_1.02	-0.225859	0.06	Depth	0.374783
KIRP	HOXB3	42208	ES	M5542_1.02	0.462299	0.08	Depth	0.398482
KIRP	BPTF	43116	AD	M3234_1.02	0.079736	0.32	Depth	0.46856
KIRP	BPTF	43116	AD	M6163_1.02	0.21153	0.08	Depth	0.398482
KIRP	TGIF1	44497	AP	M4064_1.02	0.318516	0.05	Depth	0.363241
KIRP	TGIF1	44497	AP	M5933_1.02	0.295789	0.04	Depth	0.339193
KIRP	TGIF1	44497	AP	M6519_1.02	-0.0394385	0.4	Depth	0.48512
KIRP	TGIF1	44497	AP	M6520_1.02	0.380682	0.02	Depth	0.275872
KIRP	ZNF333	48017	AT	M6555_1.02	-0.102607	0.31	Depth	0.468376
KIRP	ZNF333	48018	AT	M6555_1.02	-0.0955882	0.3	Depth	0.467189
KIRP	ZNF333	48020	AT	M6555_1.02	0.229947	0.05	Depth	0.363241
KIRP	FOSB	50450	AT	M6228_1.02	0.383356	0.04	Depth	0.339193
KIRP	FOSB	50451	AT	M6228_1.02	-0.383356	0.01	Depth	0.203094
KIRP	MEIS3	50645	AA	M5621_1.02	-0.419179	0.01	Depth	0.203094
KIRP	MEIS3	50645	AA	M5622_1.02	-0.337079	0.04	Depth	0.339193
KIRP	IRF3	50988	AD	M5572_1.02	-0.323195	0.04	Depth	0.339193
KIRP	IRF3	50988	AD	M6309_1.02	-0.218249	0.09	Depth	0.405939
KIRP	ATF5	51133	AP	M6154_1.02	0.164786	0.14	Depth	0.43632
KIRP	ATF5	51134	AP	M6154_1.02	-0.164786	0.15	Depth	0.438663
KIRP	ZNF524	52115	AP	M5974_1.02	0.191176	0.15	Depth	0.438663
KIRP	ZNF524	52115	AP	M5975_1.02	0.0441176	0.46	Depth	0.496757
KIRP	ZNF524	52116	AP	M5974_1.02	-0.191176	0.15	Depth	0.438663
KIRP	ZNF524	52116	AP	M5975_1.02	-0.0441176	0.48	Depth	0.505364
KIRP	E2F6	52689	ES	M4615_1.02	-0.150489	0.35	Depth	0.474663
KIRP	BCL11A	53658	AT	M4453_1.02	-0.0792178	0.39	Depth	0.483684
KIRP	BCL11A	53659	AT	M4453_1.02	0.0792178	0.25	Depth	0.462506
KIRP	REL	53671	ES	M3091_1.02	0.294853	0.19	Depth	0.452944
KIRP	NPAS2	54725	AP	M0196_1.02	-0.0609252	0.44	Depth	0.491324
KIRP	NPAS2	54726	AP	M0196_1.02	0.0609252	0.46	Depth	0.496757
KIRP	NR4A2	55613	AP	M5687_1.02	-0.09359	0.33	Depth	0.468733
KIRP	NR4A2	55613	AP	M5685_1.02	-0.315037	0.01	Depth	0.203094
KIRP	NR4A2	55613	AP	M5686_1.02	-0.0121593	0.43	Depth	0.489072
KIRP	NR4A2	55614	AP	M5687_1.02	0.0843784	0.33	Depth	0.468733
KIRP	NR4A2	55614	AP	M5685_1.02	0.322775	0.06	Depth	0.374783
KIRP	NR4A2	55614	AP	M5686_1.02	0.00589544	0.5	Depth	0.515062
KIRP	HOXD8	56111	ES	M5563_1.02	-0.0418079	0.38	Depth	0.480523
KIRP	HOXD3	56114	AP	M1071_1.02	-0.179266	0.18	Depth	0.449969
KIRP	HOXD3	56116	AP	M1071_1.02	0.138043	0.25	Depth	0.462506
KIRP	STAT1	56594	AT	M6493_1.02	0.404412	0.02	Depth	0.275872
KIRP	STAT1	56594	AT	M3966_1.02	0.443182	0.01	Depth	0.203094
KIRP	STAT1	56594	AT	M3968_1.02	0.28643	0.04	Depth	0.339193
KIRP	STAT1	56594	AT	M4707_1.02	0.350602	0.01	Depth	0.203094
KIRP	STAT1	56595	AT	M6493_1.02	-0.404412	0.01	Depth	0.203094
KIRP	STAT1	56595	AT	M3966_1.02	-0.443182	0.01	Depth	0.203094
KIRP	STAT1	56595	AT	M3968_1.02	-0.28643	0.08	Depth	0.398482
KIRP	STAT1	56595	AT	M4707_1.02	-0.350602	0.04	Depth	0.339193
KIRP	HNF4A	59465	AD	M6283_1.02	0.333698	0.06	Depth	0.374783
KIRP	HNF4A	59465	AD	M5524_1.02	0.19573	0.23	Depth	0.456646
KIRP	HNF4A	59465	AD	M5527_1.02	0.232685	0.17	Depth	0.44765
KIRP	HNF4A	59465	AD	M5525_1.02	0.241719	0.1	Depth	0.410039
KIRP	HNF4A	59465	AD	M4699_1.02	0.246099	0.04	Depth	0.339193
KIRP	HNF4A	59465	AD	M5529_1.02	0.213523	0.16	Depth	0.44356
KIRP	CTCFL	59903	AT	M4612_1.02	-0.229458	0.16	Depth	0.44356
KIRP	BACH1	60322	AP	M2979_1.02	0.0945367	0.38	Depth	0.480523
KIRP	BACH1	60322	AP	M4680_1.02	0.0662985	0.52	Depth	0.527461
KIRP	BACH1	60322	AP	M4681_1.02	0.0577042	0.38	Depth	0.480523
KIRP	BACH1	60322	AP	M4682_1.02	-0.108042	0.34	Depth	0.472261
KIRP	BACH1	60322	AP	M6156_1.02	0.024555	0.5	Depth	0.515062
KIRP	BACH1	60323	AP	M2979_1.02	-0.0945367	0.28	Depth	0.464162
KIRP	BACH1	60323	AP	M4680_1.02	-0.0662985	0.48	Depth	0.505364
KIRP	BACH1	60323	AP	M4681_1.02	-0.0577042	0.44	Depth	0.491324
KIRP	BACH1	60323	AP	M4682_1.02	0.108042	0.33	Depth	0.468733
KIRP	BACH1	60323	AP	M6156_1.02	-0.024555	0.45	Depth	0.494677
KIRP	PATZ1	61844	AT	M3546_1.02	0.183003	0.13	Depth	0.430329
KIRP	PATZ1	61845	AT	M3546_1.02	-0.183003	0.13	Depth	0.430329
KIRP	TEF	62421	AP	M5910_1.02	0.0583148	0.4	Depth	0.48512
KIRP	TEF	62421	AP	M6510_1.02	0.0439832	0.42	Depth	0.487425
KIRP	TEF	62422	AP	M5910_1.02	-0.0583148	0.29	Depth	0.466743
KIRP	TEF	62422	AP	M6510_1.02	-0.0439832	0.47	Depth	0.501079
KIRP	UBP1	63866	ES	M6529_1.02	-0.180318	0.17	Depth	0.44765
KIRP	MITF	65584	AP	M6345_1.02	-0.0412196	0.39	Depth	0.483684
KIRP	MITF	65585	AP	M6345_1.02	-0.00338887	0.44	Depth	0.491324
KIRP	MITF	65586	AP	M6345_1.02	-0.0982773	0.3	Depth	0.467189
KIRP	BBX	66009	ES	M1583_1.02	-0.193731	0.16	Depth	0.44356
KIRP	TFDP2	67090	AA	M6515_1.02	-0.019158	0.39	Depth	0.483684
KIRP	TFDP2	67101	ES	M6515_1.02	-0.270434	0.17	Depth	0.44765
KIRP	LEF1	70286	AP	M5596_1.02	0.326398	0.2	Depth	0.455938
KIRP	LEF1	70286	AP	M6327_1.02	0.591422	0	Depth	0
KIRP	LEF1	70287	AP	M5596_1.02	-0.326398	0.09	Depth	0.405939
KIRP	LEF1	70287	AP	M6327_1.02	-0.591422	0.01	Depth	0.203094
KIRP	ELF2	70608	AP	M6204_1.02	0.134548	0.17	Depth	0.44765
KIRP	ELF2	70610	AP	M6204_1.02	-0.134548	0.22	Depth	0.456646
KIRP	ZNF76	75901	AA	M1915_1.02	-0.340909	0.01	Depth	0.203094
KIRP	ZNF76	75903	AA	M1915_1.02	-0.329973	0.04	Depth	0.339193
KIRP	FOXP4	76112	AA	M0717_1.02	-0.308158	0.08	Depth	0.398482
KIRP	RUNX2	76398	AP	M2310_1.02	0.0712649	0.4	Depth	0.48512
KIRP	RUNX2	76398	AP	M5788_1.02	-0.128766	0.32	Depth	0.46856
KIRP	RUNX2	76398	AP	M5789_1.02	-0.0908398	0.27	Depth	0.463037
KIRP	RUNX2	76398	AP	M5790_1.02	0.0513841	0.41	Depth	0.486495
KIRP	RUNX2	76399	AP	M2310_1.02	-0.0712649	0.39	Depth	0.483684
KIRP	RUNX2	76399	AP	M5788_1.02	0.128766	0.28	Depth	0.464162
KIRP	RUNX2	76399	AP	M5789_1.02	0.0908398	0.36	Depth	0.474663
KIRP	RUNX2	76399	AP	M5790_1.02	-0.0513841	0.39	Depth	0.483684
KIRP	TCF21	77767	RI	M0214_1.02	-0.274968	0.17	Depth	0.44765
KIRP	PLAGL1	77991	AP	M6422_1.02	-0.455198	0.02	Depth	0.275872
KIRP	PLAGL1	78006	AA	M6422_1.02	0.022817	0.49	Depth	0.51005
KIRP	PLAGL1	78007	AA	M6422_1.02	0.153614	0.21	Depth	0.456646
KIRP	PLAGL1	78019	ES	M6422_1.02	0.118182	0.37	Depth	0.4769
KIRP	TBP	78496	AA	M6502_1.02	0.198773	0.18	Depth	0.449969
KIRP	TBP	78496	AA	M4011_1.02	0.107976	0.37	Depth	0.4769
KIRP	TBP	78496	AA	M4014_1.02	0.230675	0.16	Depth	0.44356
KIRP	TBP	78496	AA	M4708_1.02	0.0969326	0.41	Depth	0.486495
KIRP	MAFK	78580	AP	M4573_1.02	0.0230938	0.54	Depth	0.54288
KIRP	MAFK	78580	AP	M5609_1.02	-0.039956	0.35	Depth	0.474663
KIRP	MAFK	78580	AP	M6334_1.02	0.082478	0.42	Depth	0.487425
KIRP	MAFK	78581	AP	M4573_1.02	-0.0230938	0.45	Depth	0.494677
KIRP	MAFK	78581	AP	M5609_1.02	0.039956	0.44	Depth	0.491324
KIRP	MAFK	78581	AP	M6334_1.02	-0.082478	0.26	Depth	0.463037
KIRP	HOXA3	79051	AP	M3433_1.02	0.029082	0.36	Depth	0.474663
KIRP	HOXA3	79052	AP	M3433_1.02	-0.029082	0.58	Depth	0.580395
KIRP	HOXA9	79054	RI	M5531_1.02	0.246719	0.1	Depth	0.410039
KIRP	HOXA9	79054	RI	M5532_1.02	0.227141	0.11	Depth	0.417512
KIRP	HOXA9	79054	RI	M6289_1.02	0.167519	0.21	Depth	0.456646
KIRP	HOXA9	79054	RI	M6294_1.02	0.19733	0.13	Depth	0.430329
KIRP	CREB5	79074	AP	M5998_1.02	0.376855	0.02	Depth	0.275872
KIRP	MLXIPL	79992	AA	M5633_1.02	-0.1181	0.29	Depth	0.466743
KIRP	MLXIPL	79992	AA	M6346_1.02	0.084247	0.41	Depth	0.486495
KIRP	TFEC	81515	AP	M5932_1.02	0.16436	0.2	Depth	0.455938
KIRP	TFEC	81516	AP	M5932_1.02	0.177995	0.18	Depth	0.449969
KIRP	TFEC	81517	AP	M5932_1.02	-0.16662	0.16	Depth	0.44356
KIRP	SOX7	82607	AP	M5835_1.02	-0.0113208	0.51	Depth	0.521273
KIRP	SOX7	82607	AP	M5836_1.02	0.120756	0.34	Depth	0.472261
KIRP	SOX7	82607	AP	M5837_1.02	0.0384908	0.36	Depth	0.474663
KIRP	SOX7	82608	AP	M5835_1.02	0.0113208	0.51	Depth	0.521273
KIRP	SOX7	82608	AP	M5836_1.02	-0.120756	0.33	Depth	0.468733
KIRP	SOX7	82608	AP	M5837_1.02	-0.0384908	0.39	Depth	0.483684
KIRP	NFIB	85879	AP	M5662_1.02	-0.168106	0.26	Depth	0.463037
KIRP	NFIB	85881	AP	M5662_1.02	0.168106	0.16	Depth	0.44356
KIRP	PBX3	87588	AP	M4473_1.02	-0.202462	0.14	Depth	0.43632
KIRP	PBX3	87589	AP	M4473_1.02	0.202462	0.18	Depth	0.449969
KIRP	ZBED1	88404	AP	M5958_1.02	-0.111501	0.3	Depth	0.467189
KIRP	ZBED1	88405	AP	M5958_1.02	0.111501	0.36	Depth	0.474663
KIRP	PAX2	91786	ES	M3710_1.02	0.142555	0.24	Depth	0.4595
KIRP	PAX2	91786	ES	M3711_1.02	0.064321	0.4	Depth	0.48512
KIRP	PAX2	91786	ES	M5703_1.02	0.0334711	0.44	Depth	0.491324
KIRP	PAX2	91786	ES	M6406_1.02	0.242766	0.12	Depth	0.425792
KIRP	PAX2	91786	ES	M6407_1.02	-0.0048392	0.51	Depth	0.521273
KIRP	TCF3	94888	ES	M3155_1.02	-0.025641	0.45	Depth	0.494677
KIRP	TCF3	94888	ES	M3154_1.02	0.404444	0.03	Depth	0.320116
KIRP	TCF3	94888	ES	M6516_1.02	-0.230085	0.1	Depth	0.410039
KIRP	PAX8	533933	ES	M6411_1.02	-0.000985343	0.48	Depth	0.505364
LIHC	HES2	400	AT	M0199_1.02	-0.125	0.27	Depth	0.463037
LIHC	HES2	401	AT	M0199_1.02	0.125	0.26	Depth	0.463037
LIHC	ZBTB7B	7878	ES	M5961_1.02	-0.56044	0.04	Depth	0.339193
LIHC	ZBTB7B	7878	ES	M6539_1.02	-0.134066	0.28	Depth	0.464162
LIHC	NR1I3	8622	AT	M6387_1.02	0.17402	0.29	Depth	0.466743
LIHC	NR1I3	8622	AT	M6388_1.02	0.230392	0.17	Depth	0.44765
LIHC	NR1I3	8624	AT	M6387_1.02	-0.17402	0.3	Depth	0.467189
LIHC	NR1I3	8624	AT	M6388_1.02	-0.230392	0.14	Depth	0.43632
LIHC	NR1I3	8626	RI	M6387_1.02	-0.361765	0.13	Depth	0.430329
LIHC	NR1I3	8626	RI	M6388_1.02	-0.135294	0.41	Depth	0.486495
LIHC	NR1I3	8628	RI	M6387_1.02	-0.285294	0.1	Depth	0.410039
LIHC	NR1I3	8628	RI	M6388_1.02	-0.108824	0.36	Depth	0.474663
LIHC	NR1I3	8629	RI	M6387_1.02	-0.338235	0.14	Depth	0.43632
LIHC	NR1I3	8629	RI	M6388_1.02	-0.129412	0.34	Depth	0.472261
LIHC	NR1I3	8631	RI	M6387_1.02	-0.368132	0.09	Depth	0.405939
LIHC	NR1I3	8631	RI	M6388_1.02	-0.21978	0.25	Depth	0.462506
LIHC	NR1I3	8632	AA	M6387_1.02	0.034965	0.42	Depth	0.487425
LIHC	NR1I3	8632	AA	M6388_1.02	-0.111888	0.42	Depth	0.487425
LIHC	NR1I3	8633	AA	M6387_1.02	-0.235165	0.22	Depth	0.456646
LIHC	NR1I3	8633	AA	M6388_1.02	-0.327473	0.09	Depth	0.405939
LIHC	NR1I3	8634	AD	M6387_1.02	-0.159341	0.35	Depth	0.474663
LIHC	NR1I3	8634	AD	M6388_1.02	-0.104396	0.36	Depth	0.474663
LIHC	NR1I3	8635	ES	M6387_1.02	0.0714286	0.51	Depth	0.521273
LIHC	NR1I3	8635	ES	M6388_1.02	0.021978	0.47	Depth	0.501079
LIHC	NR1I3	8636	ES	M6387_1.02	0.130979	0.31	Depth	0.468376
LIHC	NR1I3	8636	ES	M6388_1.02	0.00441501	0.47	Depth	0.501079
LIHC	NR1I3	8637	RI	M6387_1.02	-0.282143	0.15	Depth	0.438663
LIHC	NR1I3	8637	RI	M6388_1.02	-0.185714	0.22	Depth	0.456646
LIHC	NR1I3	8641	ES	M6387_1.02	0.105611	0.43	Depth	0.489072
LIHC	NR1I3	8641	ES	M6388_1.02	0.125413	0.35	Depth	0.474663
LIHC	NR1I3	8642	ES	M6387_1.02	-0.0588235	0.4	Depth	0.48512
LIHC	NR1I3	8642	ES	M6388_1.02	-0.117647	0.35	Depth	0.474663
LIHC	NR1I3	8644	AD	M6387_1.02	-0.0928571	0.36	Depth	0.474663
LIHC	NR1I3	8644	AD	M6388_1.02	-0.0428571	0.47	Depth	0.501079
LIHC	NR1I3	8645	ES	M6387_1.02	0.204396	0.22	Depth	0.456646
LIHC	NR1I3	8645	ES	M6388_1.02	0.0593407	0.39	Depth	0.483684
LIHC	NR1I3	8646	ES	M6387_1.02	0.0529412	0.48	Depth	0.505364
LIHC	NR1I3	8646	ES	M6388_1.02	-0.208824	0.16	Depth	0.44356
LIHC	NR1I3	8647	RI	M6387_1.02	-0.367857	0.07	Depth	0.390174
LIHC	NR1I3	8647	RI	M6388_1.02	-0.0964286	0.32	Depth	0.46856
LIHC	NR1I3	8652	ES	M6387_1.02	0.157143	0.3	Depth	0.467189
LIHC	NR1I3	8652	ES	M6388_1.02	0.207143	0.26	Depth	0.463037
LIHC	NR1I3	8653	ES	M6387_1.02	-0.356891	0.16	Depth	0.44356
LIHC	NR1I3	8653	ES	M6388_1.02	-0.0842659	0.38	Depth	0.480523
LIHC	CREM	11229	AP	M6181_1.02	-0.182353	0.25	Depth	0.462506
LIHC	CREM	11231	AP	M6181_1.02	0.00882353	0.52	Depth	0.527461
LIHC	CREM	11232	AP	M6181_1.02	0.155882	0.26	Depth	0.463037
LIHC	CREM	11237	AT	M6181_1.02	-0.311275	0.09	Depth	0.405939
LIHC	CREM	11238	AT	M6181_1.02	0.389706	0.03	Depth	0.320116
LIHC	MXI1	13079	AP	M4543_1.02	-0.226374	0.22	Depth	0.456646
LIHC	MXI1	13079	AP	M4678_1.02	0.345055	0.19	Depth	0.452944
LIHC	MXI1	13079	AP	M4679_1.02	-0.652747	0	Depth	0
LIHC	MXI1	13080	AP	M4543_1.02	0.187019	0.25	Depth	0.462506
LIHC	MXI1	13080	AP	M4678_1.02	-0.290429	0.15	Depth	0.438663
LIHC	MXI1	13080	AP	M4679_1.02	0.481848	0.06	Depth	0.374783
LIHC	TCF7L2	13141	ES	M6512_1.02	-0.236364	0.18	Depth	0.449969
LIHC	TCF7L2	13156	ES	M6512_1.02	0.509091	0.07	Depth	0.390174
LIHC	ZNF143	14317	AP	M3964_1.02	0.286029	0.13	Depth	0.430329
LIHC	ZNF143	14317	AP	M3965_1.02	0.290429	0.11	Depth	0.417512
LIHC	ZNF143	14317	AP	M4484_1.02	0.343235	0.08	Depth	0.398482
LIHC	ZNF143	14318	AP	M3964_1.02	-0.286029	0.15	Depth	0.438663
LIHC	ZNF143	14318	AP	M3965_1.02	-0.290429	0.14	Depth	0.43632
LIHC	ZNF143	14318	AP	M4484_1.02	-0.343235	0.12	Depth	0.425792
LIHC	NR1H3	15692	AP	M6383_1.02	-0.335714	0.15	Depth	0.438663
LIHC	NR1H3	15695	AP	M6383_1.02	0.321429	0.16	Depth	0.44356
LIHC	CREBZF	18139	RI	M0307_1.02	-0.502451	0.01	Depth	0.203094
LIHC	ETS1	19408	AP	M5418_1.02	0.261399	0.27	Depth	0.463037
LIHC	ETS1	19408	AP	M4461_1.02	0.0607906	0.46	Depth	0.496757
LIHC	ETS1	19408	AP	M5419_1.02	0.674775	0.05	Depth	0.363241
LIHC	ETS1	19409	AP	M5418_1.02	-0.261399	0.25	Depth	0.462506
LIHC	ETS1	19409	AP	M4461_1.02	-0.0607906	0.51	Depth	0.521273
LIHC	ETS1	19409	AP	M5419_1.02	-0.674775	0.02	Depth	0.275872
LIHC	ZNF384	19923	ES	M6557_1.02	0.428571	0.06	Depth	0.374783
LIHC	NR4A1	21884	AP	M6393_1.02	0.00245248	0.42	Depth	0.487425
LIHC	NR4A1	21887	AP	M6393_1.02	-0.00245248	0.48	Depth	0.505364
LIHC	NR2C1	23741	AT	M6389_1.02	-0.191176	0.21	Depth	0.456646
LIHC	NR2C1	23742	AT	M6389_1.02	0.191176	0.25	Depth	0.462506
LIHC	NR1H4	23926	AD	M6384_1.02	0.178571	0.2	Depth	0.455938
LIHC	NFYB	24093	AP	M6372_1.02	-0.167857	0.28	Depth	0.464162
LIHC	NFYB	24094	AP	M6372_1.02	0.167857	0.21	Depth	0.456646
LIHC	NRL	26808	AP	M5689_1.02	-0.345455	0.16	Depth	0.44356
LIHC	NRL	26809	AP	M5689_1.02	0.127273	0.3	Depth	0.467189
LIHC	NRL	26811	AP	M5689_1.02	-0.226278	0.33	Depth	0.468733
LIHC	HSF4	36942	AA	M5567_1.02	0.32369	0.1	Depth	0.410039
LIHC	NFATC3	37186	ES	M1517_1.02	-0.110294	0.32	Depth	0.46856
LIHC	THRA	40839	AT	M5936_1.02	0.664216	0	Depth	0
LIHC	THRA	40839	AT	M6521_1.02	0.360294	0.06	Depth	0.374783
LIHC	THRA	40839	AT	M6522_1.02	0.247549	0.13	Depth	0.430329
LIHC	THRA	40840	AT	M5936_1.02	-0.664216	0	Depth	0
LIHC	THRA	40840	AT	M6521_1.02	-0.360294	0.09	Depth	0.405939
LIHC	THRA	40840	AT	M6522_1.02	-0.247549	0.19	Depth	0.452944
LIHC	NFE2L1	42157	AP	M4030_1.02	-0.3	0.09	Depth	0.405939
LIHC	NFE2L1	42158	AP	M4030_1.02	0.3	0.16	Depth	0.44356
LIHC	NFE2L1	42160	ES	M4030_1.02	0.0892857	0.37	Depth	0.4769
LIHC	HLF	42576	AP	M3393_1.02	0.0882353	0.36	Depth	0.474663
LIHC	HLF	42579	AP	M3393_1.02	0.00735835	0.48	Depth	0.505364
LIHC	ZNF333	48017	AT	M6555_1.02	-0.232843	0.15	Depth	0.438663
LIHC	ZNF333	48018	AT	M6555_1.02	0.0931373	0.38	Depth	0.480523
LIHC	USF2	49098	ES	M4579_1.02	0.139706	0.22	Depth	0.456646
LIHC	FOSB	50450	AT	M6228_1.02	0.17402	0.27	Depth	0.463037
LIHC	FOSB	50451	AT	M6228_1.02	-0.17402	0.21	Depth	0.456646
LIHC	IRF3	50994	ES	M5572_1.02	0.445126	0.02	Depth	0.275872
LIHC	IRF3	50994	ES	M6309_1.02	0.418148	0.07	Depth	0.390174
LIHC	IRF3	50995	ES	M5572_1.02	0.641324	0	Depth	0
LIHC	IRF3	50995	ES	M6309_1.02	0.697732	0	Depth	0
LIHC	IRF3	50998	ES	M5572_1.02	0.562199	0.01	Depth	0.203094
LIHC	IRF3	50998	ES	M6309_1.02	0.511969	0.02	Depth	0.275872
LIHC	IRF3	50999	ES	M5572_1.02	0.505314	0.05	Depth	0.363241
LIHC	IRF3	50999	ES	M6309_1.02	0.464443	0.05	Depth	0.363241
LIHC	IRF3	51010	ES	M5572_1.02	0.491403	0.1	Depth	0.410039
LIHC	IRF3	51010	ES	M6309_1.02	0.439372	0.1	Depth	0.410039
LIHC	IRF3	51012	ES	M5572_1.02	0.480805	0.02	Depth	0.275872
LIHC	IRF3	51012	ES	M6309_1.02	0.411648	0.02	Depth	0.275872
LIHC	IRF3	51030	RI	M5572_1.02	-0.136364	0.36	Depth	0.474663
LIHC	IRF3	51030	RI	M6309_1.02	-0.0636364	0.38	Depth	0.480523
LIHC	ATF5	51133	AP	M6154_1.02	0.491538	0.05	Depth	0.363241
LIHC	ATF5	51134	AP	M6154_1.02	-0.491538	0.03	Depth	0.320116
LIHC	KLF11	52652	AP	M5592_1.02	0.136364	0.23	Depth	0.456646
LIHC	KLF11	52654	AP	M5592_1.02	-0.109091	0.4	Depth	0.48512
LIHC	MEIS1	53804	AP	M3562_1.02	0.0522526	0.43	Depth	0.489072
LIHC	MEIS1	53804	AP	M6343_1.02	-0.839774	0	Depth	0
LIHC	MEIS1	53805	AP	M3562_1.02	0.054586	0.38	Depth	0.480523
LIHC	MEIS1	53805	AP	M6343_1.02	0.561456	0	Depth	0
LIHC	NR4A2	55613	AP	M5687_1.02	0.175628	0.29	Depth	0.466743
LIHC	NR4A2	55613	AP	M5685_1.02	0.175628	0.25	Depth	0.462506
LIHC	NR4A2	55613	AP	M5686_1.02	0.136202	0.31	Depth	0.468376
LIHC	NR4A2	55614	AP	M5687_1.02	-0.175628	0.33	Depth	0.468733
LIHC	NR4A2	55614	AP	M5685_1.02	-0.175628	0.3	Depth	0.467189
LIHC	NR4A2	55614	AP	M5686_1.02	-0.136202	0.36	Depth	0.474663
LIHC	NFE2L2	56127	AP	M6360_1.02	-0.489691	0.01	Depth	0.203094
LIHC	NFE2L2	56129	AP	M6360_1.02	0.1	0.33	Depth	0.468733
LIHC	HNF4A	59461	AP	M6283_1.02	0.208824	0.23	Depth	0.456646
LIHC	HNF4A	59461	AP	M5524_1.02	0.144118	0.37	Depth	0.4769
LIHC	HNF4A	59461	AP	M5527_1.02	0.155882	0.29	Depth	0.466743
LIHC	HNF4A	59461	AP	M5525_1.02	0.161765	0.27	Depth	0.463037
LIHC	HNF4A	59461	AP	M4699_1.02	-0.211765	0.25	Depth	0.462506
LIHC	HNF4A	59461	AP	M5529_1.02	0.217647	0.28	Depth	0.464162
LIHC	HNF4A	59462	AP	M6283_1.02	-0.208824	0.21	Depth	0.456646
LIHC	HNF4A	59462	AP	M5524_1.02	-0.144118	0.21	Depth	0.456646
LIHC	HNF4A	59462	AP	M5527_1.02	-0.155882	0.29	Depth	0.466743
LIHC	HNF4A	59462	AP	M5525_1.02	-0.161765	0.19	Depth	0.452944
LIHC	HNF4A	59462	AP	M4699_1.02	0.211765	0.2	Depth	0.455938
LIHC	HNF4A	59462	AP	M5529_1.02	-0.217647	0.19	Depth	0.452944
LIHC	HNF4A	59465	AD	M6283_1.02	-0.417857	0.04	Depth	0.339193
LIHC	HNF4A	59465	AD	M5524_1.02	-0.482143	0.04	Depth	0.339193
LIHC	HNF4A	59465	AD	M5527_1.02	-0.460714	0.04	Depth	0.339193
LIHC	HNF4A	59465	AD	M5525_1.02	-0.435714	0.05	Depth	0.363241
LIHC	HNF4A	59465	AD	M4699_1.02	-0.5	0.03	Depth	0.320116
LIHC	HNF4A	59465	AD	M5529_1.02	-0.471429	0.04	Depth	0.339193
LIHC	MAFF	62214	AP	M4572_1.02	-0.156734	0.36	Depth	0.474663
LIHC	MAFF	62214	AP	M2295_1.02	-0.0551882	0.39	Depth	0.483684
LIHC	MAFF	62216	AP	M4572_1.02	0.116999	0.34	Depth	0.472261
LIHC	MAFF	62216	AP	M2295_1.02	0.0507731	0.32	Depth	0.46856
LIHC	PPARG	63413	AP	M1894_1.02	-0.24826	0.22	Depth	0.456646
LIHC	PPARG	63413	AP	M3783_1.02	0.292071	0.18	Depth	0.449969
LIHC	PPARG	63413	AP	M3785_1.02	0.257996	0.17	Depth	0.44765
LIHC	PPARG	63413	AP	M6433_1.02	0.150903	0.3	Depth	0.467189
LIHC	PPARG	63413	AP	M6434_1.02	0.282335	0.13	Depth	0.430329
LIHC	MECOM	67568	AP	M3227_1.02	0.115152	0.37	Depth	0.4769
LIHC	MECOM	67568	AP	M3225_1.02	-0.0545455	0.36	Depth	0.474663
LIHC	MECOM	67568	AP	M3228_1.02	0.490909	0.1	Depth	0.410039
LIHC	MECOM	67568	AP	M3230_1.02	0.0666667	0.55	Depth	0.552178
LIHC	NR3C1	73877	AP	M4440_1.02	-0.412088	0.01	Depth	0.203094
LIHC	NR3C1	73877	AP	M3356_1.02	-0.247253	0.16	Depth	0.44356
LIHC	NR3C1	73877	AP	M3359_1.02	-0.0714286	0.49	Depth	0.51005
LIHC	NR3C1	73877	AP	M6260_1.02	-0.307692	0.14	Depth	0.43632
LIHC	NR3C1	73877	AP	M6261_1.02	-0.137363	0.35	Depth	0.474663
LIHC	NR3C1	73878	AP	M4440_1.02	0.456044	0.09	Depth	0.405939
LIHC	NR3C1	73878	AP	M3356_1.02	0.357143	0.14	Depth	0.43632
LIHC	NR3C1	73878	AP	M3359_1.02	-0.0384615	0.53	Depth	0.535242
LIHC	NR3C1	73878	AP	M6260_1.02	0.313187	0.14	Depth	0.43632
LIHC	NR3C1	73878	AP	M6261_1.02	0.120879	0.35	Depth	0.474663
LIHC	NR3C1	73880	AP	M4440_1.02	-0.508941	0.06	Depth	0.374783
LIHC	NR3C1	73880	AP	M3356_1.02	-0.082531	0.46	Depth	0.496757
LIHC	NR3C1	73880	AP	M3359_1.02	-0.0357634	0.48	Depth	0.505364
LIHC	NR3C1	73880	AP	M6260_1.02	-0.148556	0.38	Depth	0.480523
LIHC	NR3C1	73880	AP	M6261_1.02	-0.0550207	0.43	Depth	0.489072
LIHC	ZNF76	75902	ES	M1915_1.02	0.0882353	0.29	Depth	0.466743
LIHC	NFYA	76094	ES	M1890_1.02	0.030303	0.46	Depth	0.496757
LIHC	NFYA	76094	ES	M3628_1.02	-0.115152	0.5	Depth	0.515062
LUAD	HES4	4	AD	M0191_1.02	-0.139535	0.26	Depth	0.463037
LUAD	PRDM16	302	AA	M1861_1.02	-0.539403	0.08	Depth	0.398482
LUAD	PRDM16	303	ES	M1861_1.02	-0.315636	0.1	Depth	0.410039
LUAD	NFYC	2013	AP	M6373_1.02	-0.0902256	0.26	Depth	0.463037
LUAD	NFYC	2015	AP	M6373_1.02	-0.00300752	0.53	Depth	0.535242
LUAD	ARNT	7513	ES	M2957_1.02	0.321053	0.08	Depth	0.398482
LUAD	ARNT	7513	ES	M6151_1.02	0.429825	0.03	Depth	0.320116
LUAD	RORC	7674	ES	M6455_1.02	0.0351058	0.5	Depth	0.515062
LUAD	ZBTB7B	7877	AP	M5961_1.02	0.284211	0.16	Depth	0.44356
LUAD	ZBTB7B	7877	AP	M6539_1.02	0.34386	0.08	Depth	0.398482
LUAD	ZBTB7B	7878	ES	M5961_1.02	0.0541557	0.37	Depth	0.4769
LUAD	ZBTB7B	7878	ES	M6539_1.02	-0.0842422	0.42	Depth	0.487425
LUAD	ZBTB7B	7879	ES	M5961_1.02	0.022817	0.49	Depth	0.51005
LUAD	ZBTB7B	7879	ES	M6539_1.02	-0.0526547	0.38	Depth	0.480523
LUAD	ATF3	9737	AA	M4552_1.02	0.478195	0.01	Depth	0.203094
LUAD	ATF3	9737	AA	M4684_1.02	0.0406015	0.49	Depth	0.51005
LUAD	ATF3	9737	AA	M6153_1.02	0.162406	0.3	Depth	0.467189
LUAD	CREM	11231	AP	M6181_1.02	0.00451128	0.5	Depth	0.515062
LUAD	CREM	11237	AT	M6181_1.02	-0.195489	0.21	Depth	0.456646
LUAD	CREM	11238	AT	M6181_1.02	0.0932331	0.34	Depth	0.472261
LUAD	ARID5B	11865	AP	M3574_1.02	0.301009	0.05	Depth	0.363241
LUAD	ARID5B	11865	AP	M6149_1.02	0.322071	0.11	Depth	0.417512
LUAD	ARID5B	11866	AP	M3574_1.02	-0.301009	0.12	Depth	0.425792
LUAD	ARID5B	11866	AP	M6149_1.02	-0.322071	0.1	Depth	0.410039
LUAD	HHEX	12536	AP	M1110_1.02	0.0300752	0.45	Depth	0.494677
LUAD	HHEX	12537	AP	M1110_1.02	-0.0300752	0.49	Depth	0.51005
LUAD	NFKB2	12946	AP	M5669_1.02	-0.157895	0.33	Depth	0.468733
LUAD	NFKB2	12946	AP	M6370_1.02	-0.0526316	0.43	Depth	0.489072
LUAD	NFKB2	12947	AP	M5669_1.02	0.157895	0.23	Depth	0.456646
LUAD	NFKB2	12947	AP	M6370_1.02	0.0526316	0.41	Depth	0.486495
LUAD	MXI1	13079	AP	M4543_1.02	0.0210526	0.46	Depth	0.496757
LUAD	MXI1	13079	AP	M4678_1.02	-0.0796992	0.32	Depth	0.46856
LUAD	MXI1	13079	AP	M4679_1.02	0.0210526	0.44	Depth	0.491324
LUAD	MXI1	13080	AP	M4543_1.02	-0.156391	0.27	Depth	0.463037
LUAD	MXI1	13080	AP	M4678_1.02	0.169925	0.31	Depth	0.468376
LUAD	MXI1	13080	AP	M4679_1.02	-0.133835	0.25	Depth	0.462506
LUAD	TCF7L2	13140	ES	M6512_1.02	-0.141115	0.35	Depth	0.474663
LUAD	TCF7L2	13141	ES	M6512_1.02	-0.436842	0.01	Depth	0.203094
LUAD	TCF7L2	13146	ES	M6512_1.02	-0.0687963	0.38	Depth	0.480523
LUAD	TCF7L2	13150	AD	M6512_1.02	-0.423513	0.02	Depth	0.275872
LUAD	TCF7L2	13156	ES	M6512_1.02	-0.519744	0	Depth	0
LUAD	IRF7	13708	AA	M3480_1.02	-0.0894737	0.35	Depth	0.474663
LUAD	IRF7	13708	AA	M5576_1.02	-0.0473684	0.4	Depth	0.48512
LUAD	IRF7	13708	AA	M5577_1.02	-0.17193	0.19	Depth	0.452944
LUAD	IRF7	13708	AA	M6312_1.02	-0.164912	0.21	Depth	0.456646
LUAD	IRF7	13714	ES	M3480_1.02	0.067925	0.48	Depth	0.505364
LUAD	IRF7	13714	ES	M5576_1.02	0.0883025	0.32	Depth	0.46856
LUAD	IRF7	13714	ES	M5577_1.02	0.0973592	0.33	Depth	0.468733
LUAD	IRF7	13714	ES	M6312_1.02	0.00301889	0.37	Depth	0.4769
LUAD	IRF7	13715	ES	M3480_1.02	0.261654	0.1	Depth	0.410039
LUAD	IRF7	13715	ES	M5576_1.02	0.315789	0.08	Depth	0.398482
LUAD	IRF7	13715	ES	M5577_1.02	0.133835	0.26	Depth	0.463037
LUAD	IRF7	13715	ES	M6312_1.02	0.160902	0.25	Depth	0.462506
LUAD	IRF7	13720	RI	M3480_1.02	-0.322807	0.08	Depth	0.398482
LUAD	IRF7	13720	RI	M5576_1.02	-0.350877	0.04	Depth	0.339193
LUAD	IRF7	13720	RI	M5577_1.02	-0.282456	0.12	Depth	0.425792
LUAD	IRF7	13720	RI	M6312_1.02	-0.182456	0.21	Depth	0.456646
LUAD	TEAD1	14433	AP	M1916_1.02	-0.365514	0.06	Depth	0.374783
LUAD	TEAD1	14433	AP	M5905_1.02	0.134228	0.24	Depth	0.4595
LUAD	TEAD1	14434	AP	M1916_1.02	0.365514	0.06	Depth	0.374783
LUAD	TEAD1	14434	AP	M5905_1.02	-0.134228	0.28	Depth	0.464162
LUAD	ELF5	14949	AP	M5379_1.02	0.283798	0.23	Depth	0.456646
LUAD	ELF5	14950	AP	M5379_1.02	-0.283798	0.24	Depth	0.4595
LUAD	NR1H3	15692	AP	M6383_1.02	-0.172343	0.26	Depth	0.463037
LUAD	NR1H3	15694	AP	M6383_1.02	0.0454311	0.32	Depth	0.46856
LUAD	NR1H3	15695	AP	M6383_1.02	0.135191	0.24	Depth	0.4595
LUAD	ESRRA	16630	AP	M5404_1.02	0.0614035	0.4	Depth	0.48512
LUAD	ESRRA	16630	AP	M4663_1.02	-0.303509	0.06	Depth	0.374783
LUAD	ESRRA	16630	AP	M5405_1.02	0.135088	0.21	Depth	0.456646
LUAD	ESRRA	16630	AP	M5409_1.02	0.34386	0.07	Depth	0.390174
LUAD	ESRRA	16631	AP	M5404_1.02	-0.0614035	0.38	Depth	0.480523
LUAD	ESRRA	16631	AP	M4663_1.02	0.303509	0.08	Depth	0.398482
LUAD	ESRRA	16631	AP	M5405_1.02	-0.135088	0.3	Depth	0.467189
LUAD	ESRRA	16631	AP	M5409_1.02	-0.34386	0.1	Depth	0.410039
LUAD	CREBZF	18139	RI	M0307_1.02	0.215038	0.16	Depth	0.44356
LUAD	ZNF384	19921	AP	M6557_1.02	0.170741	0.18	Depth	0.449969
LUAD	ZNF384	19922	AP	M6557_1.02	-0.170741	0.24	Depth	0.4595
LUAD	ZNF384	19923	ES	M6557_1.02	0.124812	0.36	Depth	0.474663
LUAD	ZNF384	19927	AD	M6557_1.02	0.324213	0.07	Depth	0.390174
LUAD	NR4A1	21884	AP	M6393_1.02	-0.124812	0.27	Depth	0.463037
LUAD	NR4A1	21887	AP	M6393_1.02	0.111278	0.32	Depth	0.46856
LUAD	RARG	21979	AP	M1435_1.02	-0.0842105	0.33	Depth	0.468733
LUAD	RARG	21979	AP	M5768_1.02	-0.0315789	0.44	Depth	0.491324
LUAD	RARG	21979	AP	M5769_1.02	0.136842	0.28	Depth	0.464162
LUAD	RARG	21979	AP	M5767_1.02	0.0421053	0.41	Depth	0.486495
LUAD	RARG	21979	AP	M6446_1.02	-0.0280702	0.4	Depth	0.48512
LUAD	RARG	21980	AP	M1435_1.02	0.0842105	0.41	Depth	0.486495
LUAD	RARG	21980	AP	M5768_1.02	0.0315789	0.53	Depth	0.535242
LUAD	RARG	21980	AP	M5769_1.02	-0.136842	0.37	Depth	0.4769
LUAD	RARG	21980	AP	M5767_1.02	-0.0421053	0.39	Depth	0.483684
LUAD	RARG	21980	AP	M6446_1.02	0.0280702	0.43	Depth	0.489072
LUAD	ATF7	22090	AP	M5293_1.02	-0.00676946	0.53	Depth	0.535242
LUAD	ATF7	22092	AP	M5293_1.02	0.00676946	0.5	Depth	0.515062
LUAD	ATF7	22095	AT	M5293_1.02	-0.146672	0.17	Depth	0.44765
LUAD	DDIT3	22624	RI	M6187_1.02	-0.231755	0.11	Depth	0.417512
LUAD	HMGA2	22880	AT	M6280_1.02	-0.410526	0.06	Depth	0.374783
LUAD	HMGA2	22881	AT	M6280_1.02	0.615038	0	Depth	0
LUAD	NR2C1	23741	AT	M6389_1.02	0.32782	0.06	Depth	0.374783
LUAD	NR2C1	23742	AT	M6389_1.02	-0.32782	0.05	Depth	0.363241
LUAD	NFYB	24093	AP	M6372_1.02	0.0947368	0.3	Depth	0.467189
LUAD	NFYB	24094	AP	M6372_1.02	-0.0947368	0.41	Depth	0.486495
LUAD	TBX5	24649	AP	M5898_1.02	0.0352941	0.48	Depth	0.505364
LUAD	TBX5	24649	AP	M5899_1.02	0.555882	0.01	Depth	0.203094
LUAD	TBX5	24650	AP	M5898_1.02	-0.0352941	0.49	Depth	0.51005
LUAD	TBX5	24650	AP	M5899_1.02	-0.555882	0.02	Depth	0.275872
LUAD	HNF1A	24782	AT	M6281_1.02	-0.0195489	0.54	Depth	0.54288
LUAD	HNF1A	24782	AT	M3407_1.02	-0.312782	0.07	Depth	0.390174
LUAD	HNF1A	24784	AT	M6281_1.02	0.0195489	0.43	Depth	0.489072
LUAD	HNF1A	24784	AT	M3407_1.02	0.312782	0.09	Depth	0.405939
LUAD	KDM2B	24879	RI	M0607_1.02	0.331704	0.08	Depth	0.398482
LUAD	TFDP1	26387	AD	M6515_1.02	0.206015	0.16	Depth	0.44356
LUAD	TFDP1	26393	ES	M6515_1.02	0.0473862	0.34	Depth	0.472261
LUAD	ZNF219	26526	AP	M6553_1.02	0.146429	0.32	Depth	0.46856
LUAD	ZNF219	26527	AP	M6553_1.02	0.317857	0.12	Depth	0.425792
LUAD	NFATC4	26983	AP	M6365_1.02	-0.114286	0.32	Depth	0.46856
LUAD	NFATC4	26986	AP	M6365_1.02	0.115789	0.25	Depth	0.462506
LUAD	NFATC4	26991	RI	M6365_1.02	-0.17594	0.3	Depth	0.467189
LUAD	NFATC4	26993	AD	M6365_1.02	0.651373	0	Depth	0
LUAD	ZBTB1	27894	ES	M0413_1.02	-0.00723515	0.56	Depth	0.561681
LUAD	MAX	28008	ES	M4646_1.02	-0.300752	0.12	Depth	0.425792
LUAD	MAX	28008	ES	M1889_1.02	-0.0962406	0.47	Depth	0.501079
LUAD	MAX	28008	ES	M5613_1.02	-0.341353	0.08	Depth	0.398482
LUAD	ZNF410	28328	ES	M5972_1.02	-0.233083	0.18	Depth	0.449969
LUAD	FOS	28495	RI	M2278_1.02	-0.0528562	0.43	Depth	0.489072
LUAD	FOS	28495	RI	M6231_1.02	-0.226176	0.17	Depth	0.44765
LUAD	JDP2	28500	AP	M5587_1.02	-0.310663	0.09	Depth	0.405939
LUAD	JDP2	28500	AP	M5590_1.02	-0.451953	0.04	Depth	0.339193
LUAD	MEIS2	29905	AP	M5619_1.02	0.186466	0.2	Depth	0.455938
LUAD	MEIS2	29905	AP	M5620_1.02	0.0601504	0.42	Depth	0.487425
LUAD	MEIS2	29906	AP	M5619_1.02	-0.144361	0.3	Depth	0.467189
LUAD	MEIS2	29906	AP	M5620_1.02	-0.206015	0.16	Depth	0.44356
LUAD	MEIS2	29907	AP	M5619_1.02	0.310583	0.07	Depth	0.390174
LUAD	MEIS2	29907	AP	M5620_1.02	0.342114	0.04	Depth	0.339193
LUAD	TCF12	30789	ES	M4479_1.02	0.0877193	0.39	Depth	0.483684
LUAD	NR2F2	32594	AP	M4702_1.02	0.326316	0.08	Depth	0.398482
LUAD	NR2F2	32594	AP	M2960_1.02	0.383459	0.03	Depth	0.320116
LUAD	NR2F2	32594	AP	M4703_1.02	0.111278	0.31	Depth	0.468376
LUAD	NR2F2	32594	AP	M6179_1.02	0.336842	0.08	Depth	0.398482
LUAD	ZNF263	33506	AP	M4604_1.02	0.233434	0.19	Depth	0.452944
LUAD	ZNF263	33506	AP	M2324_1.02	0.118976	0.26	Depth	0.463037
LUAD	ZNF263	33507	AP	M4604_1.02	-0.233434	0.18	Depth	0.449969
LUAD	ZNF263	33507	AP	M2324_1.02	-0.118976	0.28	Depth	0.464162
LUAD	ZNF263	33512	ES	M4604_1.02	0.206328	0.24	Depth	0.4595
LUAD	ZNF263	33512	ES	M2324_1.02	0.178817	0.3	Depth	0.467189
LUAD	MAZ	35937	AP	M6336_1.02	0.0360902	0.46	Depth	0.496757
LUAD	MAZ	35938	AP	M6336_1.02	-0.0616541	0.35	Depth	0.474663
LUAD	ZNF232	38656	RI	M5967_1.02	0.10764	0.41	Depth	0.486495
LUAD	SREBF1	39500	AP	M2387_1.02	-0.117293	0.33	Depth	0.468733
LUAD	SREBF1	39500	AP	M3944_1.02	-0.434586	0.04	Depth	0.339193
LUAD	SREBF1	39501	AP	M2387_1.02	0.117293	0.36	Depth	0.474663
LUAD	SREBF1	39501	AP	M3944_1.02	0.434586	0.02	Depth	0.275872
LUAD	SREBF1	39507	ES	M2387_1.02	0.02783	0.42	Depth	0.487425
LUAD	SREBF1	39507	ES	M3944_1.02	0.270026	0.14	Depth	0.43632
LUAD	RARA	40857	AP	M5763_1.02	0.141353	0.31	Depth	0.468376
LUAD	RARA	40857	AP	M5762_1.02	-0.0887218	0.33	Depth	0.468733
LUAD	RARA	40857	AP	M5761_1.02	-0.177444	0.25	Depth	0.462506
LUAD	RARA	40857	AP	M6443_1.02	0.0105263	0.44	Depth	0.491324
LUAD	RARA	40858	AP	M5763_1.02	0.0601504	0.42	Depth	0.487425
LUAD	RARA	40858	AP	M5762_1.02	-0.109774	0.28	Depth	0.464162
LUAD	RARA	40858	AP	M5761_1.02	0.150376	0.26	Depth	0.463037
LUAD	RARA	40858	AP	M6443_1.02	0.0285714	0.46	Depth	0.496757
LUAD	RARA	40859	AP	M5763_1.02	-0.233083	0.19	Depth	0.452944
LUAD	RARA	40859	AP	M5762_1.02	0.276692	0.15	Depth	0.438663
[truncated: 5,353 more rows]
